# Supplementary material for: Elucidating Atropisomerism in Nonplanar Porphyrins with Tunable Supramolecular Complexes
Source: PubMed Central journal article supplement — Chemistry. 2020 Nov 24;27(1):331–9. doi: 10.1002/chem.202003414 (PMC7839692; doi:10.1002/chem.202003414), 2020-11-24
Supplement: CHEM-27-331-s001.pdf [file CHEM-27-331-s001.pdf]

# Chemistry–A European Journal

Supporting Information

## Elucidating Atropisomerism in Nonplanar Porphyrins with Tunable Supramolecular Complexes

Karolis Norvaiša,<sup>[a]</sup> John E. O'Brien,<sup>[a]</sup> Dáire J. Gibbons,<sup>[a]</sup> and Mathias O. Senge\*<sup>[a, b]</sup>

## Table of Contents

|                                                                                              |    |
|----------------------------------------------------------------------------------------------|----|
| Experimental Procedures .....                                                                | 2  |
| General Methods.....                                                                         | 2  |
| Synthesis and Characterization of Compounds .....                                            | 3  |
| <i>Synthesis and Characterization of <math>\alpha,\beta,\alpha,\beta</math>-P1-BSA</i> ..... | 3  |
| <i>Synthesis and Characterization of <math>\alpha_2,\beta_2</math>-P1-BSA</i> .....          | 11 |
| <i>Synthesis and Characterization of <math>\alpha_3,\beta</math>-P1-BSA</i> .....            | 21 |
| <i>Synthesis and Characterization of <math>\alpha_4</math>-P1-BSA</i> .....                  | 33 |
| Determination of Atropisomeric Mixtures by NMR.....                                          | 41 |
| Structural Determination of Receptor-Substrate Complexes and Atropisomers.....               | 43 |
| References .....                                                                             | 55 |

## SUPPORTING INFORMATION

## Experimental Procedures

## General Methods

**NMR spectra** were recorded on a Bruker Advance III 400 MHz, a Bruker Advance HD 400 and an Agilent 400 spectrometer for  $^1\text{H}$  (400.13 MHz) and  $^{13}\text{C}$  (100.61 MHz) NMR spectra. A Bruker Ultrashield 600 spectrometer was employed for  $^1\text{H}$  (600.13 MHz),  $^{13}\text{C}$  (150.90 MHz) and  $^{15}\text{N}$  NMR (61 MHz) spectra. All NMR experiments were performed at 25 °C. Resonances  $\delta$  are given in ppm units and referenced to the deuterium signal in the NMR solvents, acetonitrile- $d_3$  ( $\delta_{\text{H}} = 1.94$  ppm,  $\delta_{\text{C}} = 1.32, 118.26$  ppm). Signal multiplicities are abbreviated as follows: singlet = s, doublet = d, triplet = t, dq = doublet of quartets, multiplet = m.

**Single crystal X-ray crystallography:** Diffraction data for all compounds were collected on a Bruker APEX 2 DUO CCD diffractometer using graphite-monochromated Mo- $K_{\alpha}$  ( $\lambda = 0.71073$  Å) and Incoatec  $\mu\text{S}$  Cu- $K_{\alpha}$  ( $\lambda = 1.54178$  Å) radiation. Crystals were mounted on a MiTeGen MicroMount and collected at 100(2) K using an Oxford Cryosystems Cobra low-temperature device. Data were collected using omega and phi scans and were corrected for Lorentz and polarization effects using the APEX software suite.<sup>[S1]</sup> Data were corrected for absorption effects using the multi-scan method (SADABS).<sup>[S2]</sup>

**Shelntt's NSD** (normal structural decomposition) method was used to delineate, quantify and illustrate the various distortions modes present in the tetrapyrrole macrocycles.<sup>[S3]</sup> NSD calculations were performed with the NSD GUI version of the program.<sup>[S4]</sup>

**Crystals** were grown following the protocol developed by Hope, e.g. oversaturated porphyrin/ DMSO solution, slow evaporation in acetonitrile or slow liquid-liquid diffusion of  $\text{CHCl}_3$  and MeOH.<sup>[S5]</sup> Using Olex2, the structure was solved with the XT structure solution program, using the intrinsic phasing solution method and refined against  $|F^2|$  with XL using least-squares minimization.<sup>[S6]</sup> If electron density was not sufficient, the C and N bound H atoms were placed in their expected calculated positions and refined using a riding model: N-H = 0.88 Å, C-H = 0.95–0.98 Å, with  $U_{\text{iso}}(\text{H}) = 1.5U_{\text{eq}}(\text{C})$  for methyl H atoms and  $1.2U_{\text{eq}}(\text{C}, \text{N})$ . Details of data refinements can be found in Table S1-S2. All images were prepared using Olex2.<sup>[S6a]</sup>

## SUPPORTING INFORMATION

## Synthesis and Characterization of Compounds

Synthesis and Characterization of  $\alpha,\beta,\alpha,\beta$ -P1-BSA

**$\alpha,\beta,\alpha,\beta$ -5,10,15,20-Tetrakis(2-aminiumphenyl)-2,3,7,8,12,13,17,18-octaethylporphyrin hexa-benzenesulfonic acid salt ( $\alpha,\beta,\alpha,\beta$ -P1-BSA).** In a sample tube benzenesulfonic acid (0.82 mg; 0.25 mmol; 50 eq.) was dissolved in 1 mL of acetonitrile- $d_3$ . Isomerically pure [ $\alpha,\beta,\alpha,\beta$ -5,10,15,20-tetrakis(2-aminophenyl)-2,3,7,8,12,13,17,18-octaethylporphyrinato]nickel(II) (5 mg; 0.005 mmol; 1 eq.) was added in one batch and stirred for 16 hours. The completion of demetalation followed by complex formation was identified by a distinct color change (maroon to green) of the solution.  $^1\text{H}$  NMR (600 MHz, acetonitrile- $d_3$ )  $\delta$  = 8.92 (d,  $J$  = 7.5 Hz, 4H, Ar-H), 8.11 (t,  $J$  = 7.7 Hz, 4H, Ar-H), 8.02 (d,  $J$  = 8.1 Hz, 4H, Ar-H), 7.99 (t,  $J$  = 7.6 Hz, 4H, Ar-H), 2.63 (dq,  $J$  = 14.9, 7.6 Hz, 4H,  $\text{CH}_2$  (a)), 2.38 (dq,  $J$  = 15.1, 7.5 Hz, 4H,  $\text{CH}_2$  (b)), 2.06 (dq,  $J$  = 15.1, 7.7 Hz, 4H,  $\text{CH}_2$  (b)), 1.86 (dq,  $J$  = 15.4, 7.7 Hz, 4H,  $\text{CH}_2$  (a)), 0.62 (t,  $J$  = 7.6 Hz, 12H,  $\text{CH}_3$  (b)), 0.05 (t,  $J$  = 7.5 Hz, 12H,  $\text{CH}_3$  (a)), -1.42 (s, 4H) ppm.;  $^{13}\text{C}$  NMR (151 MHz, acetonitrile- $d_3$ )  $\delta$  = 145.01 ( $\alpha$ -pyrrole (b)), 144 ( $\beta$ -pyrrole (b)), 143.82 ( $\beta$ -pyrrole (a)), 143.63 ( $\alpha$ -pyrrole (a)), 140.12 (Ar), 134.41 (Ar), 132.86 (Ar), 132.11 (Ar), 130.91 (Ar), 126.02 (Ar), 113.12 (meso-), 20.62 ( $\text{CH}_2$  (b)), 19.81 ( $\text{CH}_2$  (a)), 15.56 ( $\text{CH}_3$  (b)), 15.28 ( $\text{CH}_3$  (a)) ppm.;  $^{15}\text{N}$  NMR (61 MHz, acetonitrile- $d_3$ )  $\delta$  126.46 (N-H) ppm.

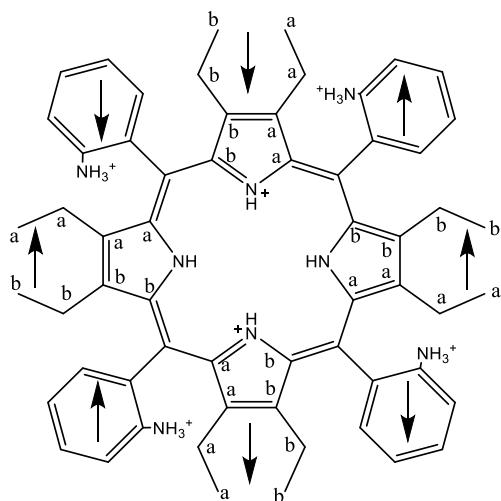

**Figure S1.** Structure of  $\alpha,\beta,\alpha,\beta$ -P1-BSA highlighting the positions used in the NMR characterizations.

## SUPPORTING INFORMATION

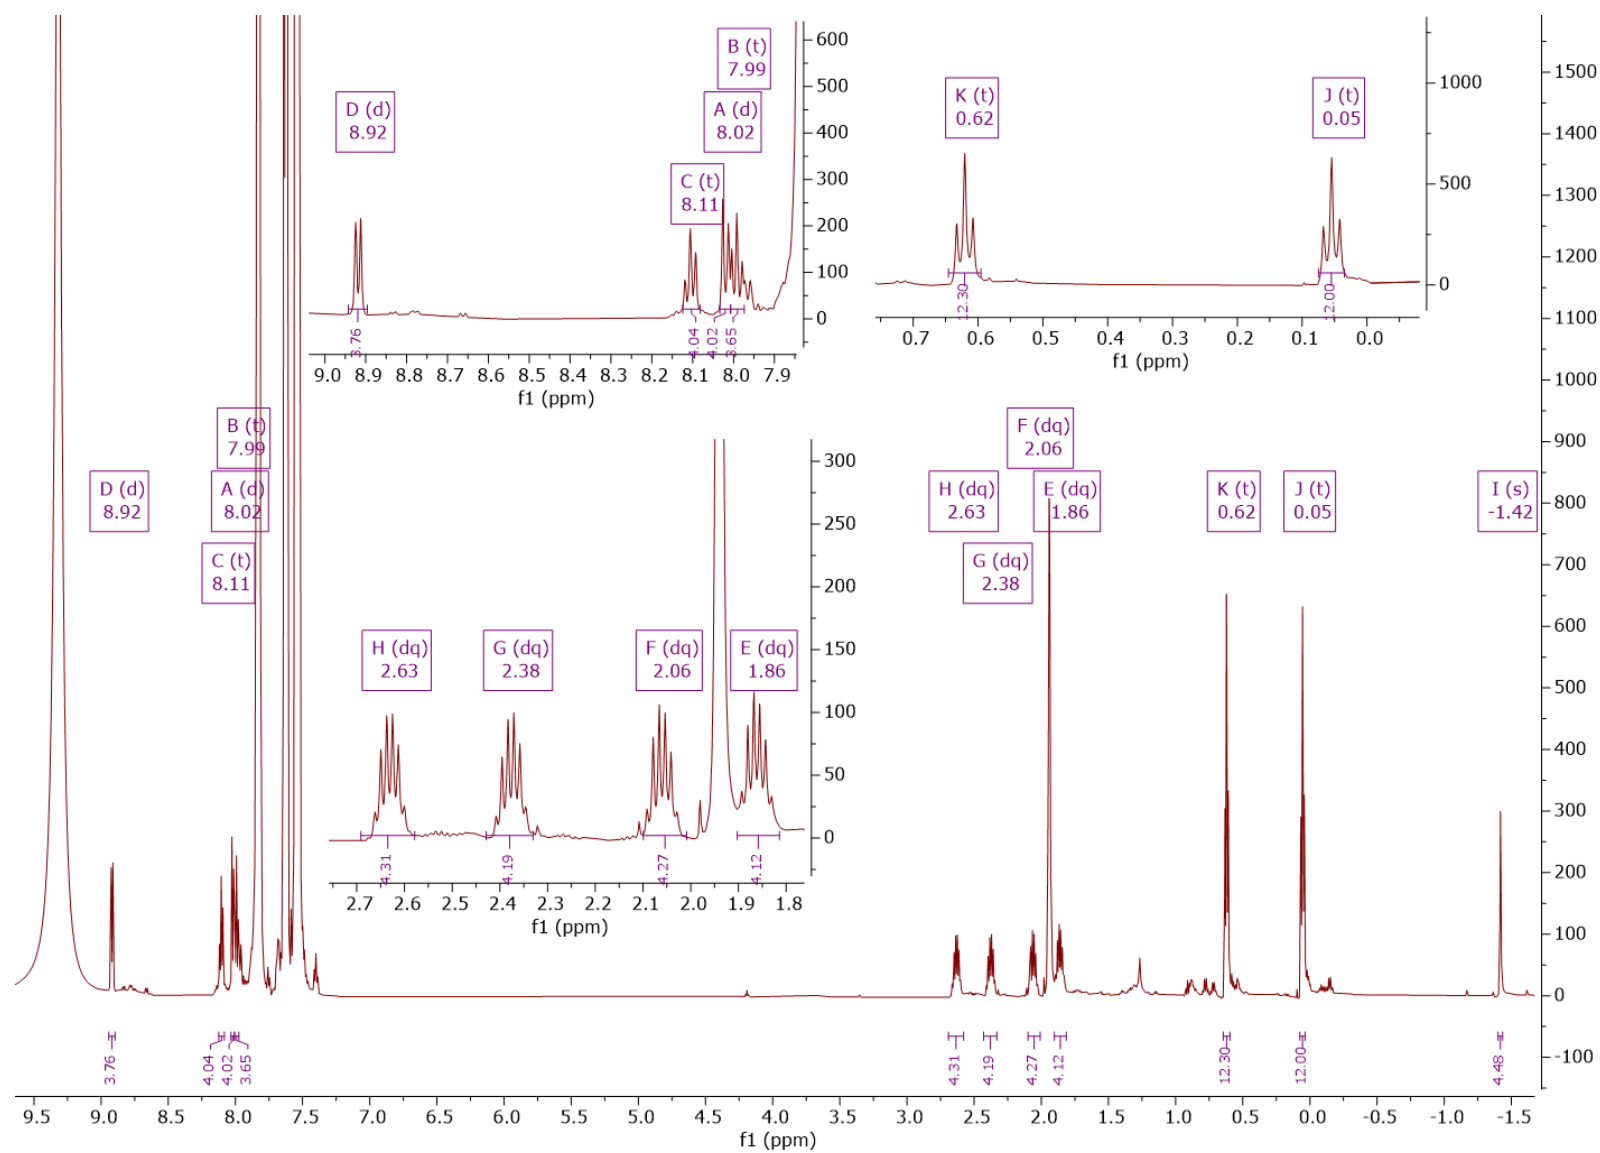

**Figure S2.** <sup>1</sup>H NMR spectrum of  $\alpha,\beta,\alpha,\beta$ -P1-BSA with expansion of areas of interest (600 MHz, acetonitrile-*d*<sub>3</sub>, 25 °C).

## SUPPORTING INFORMATION

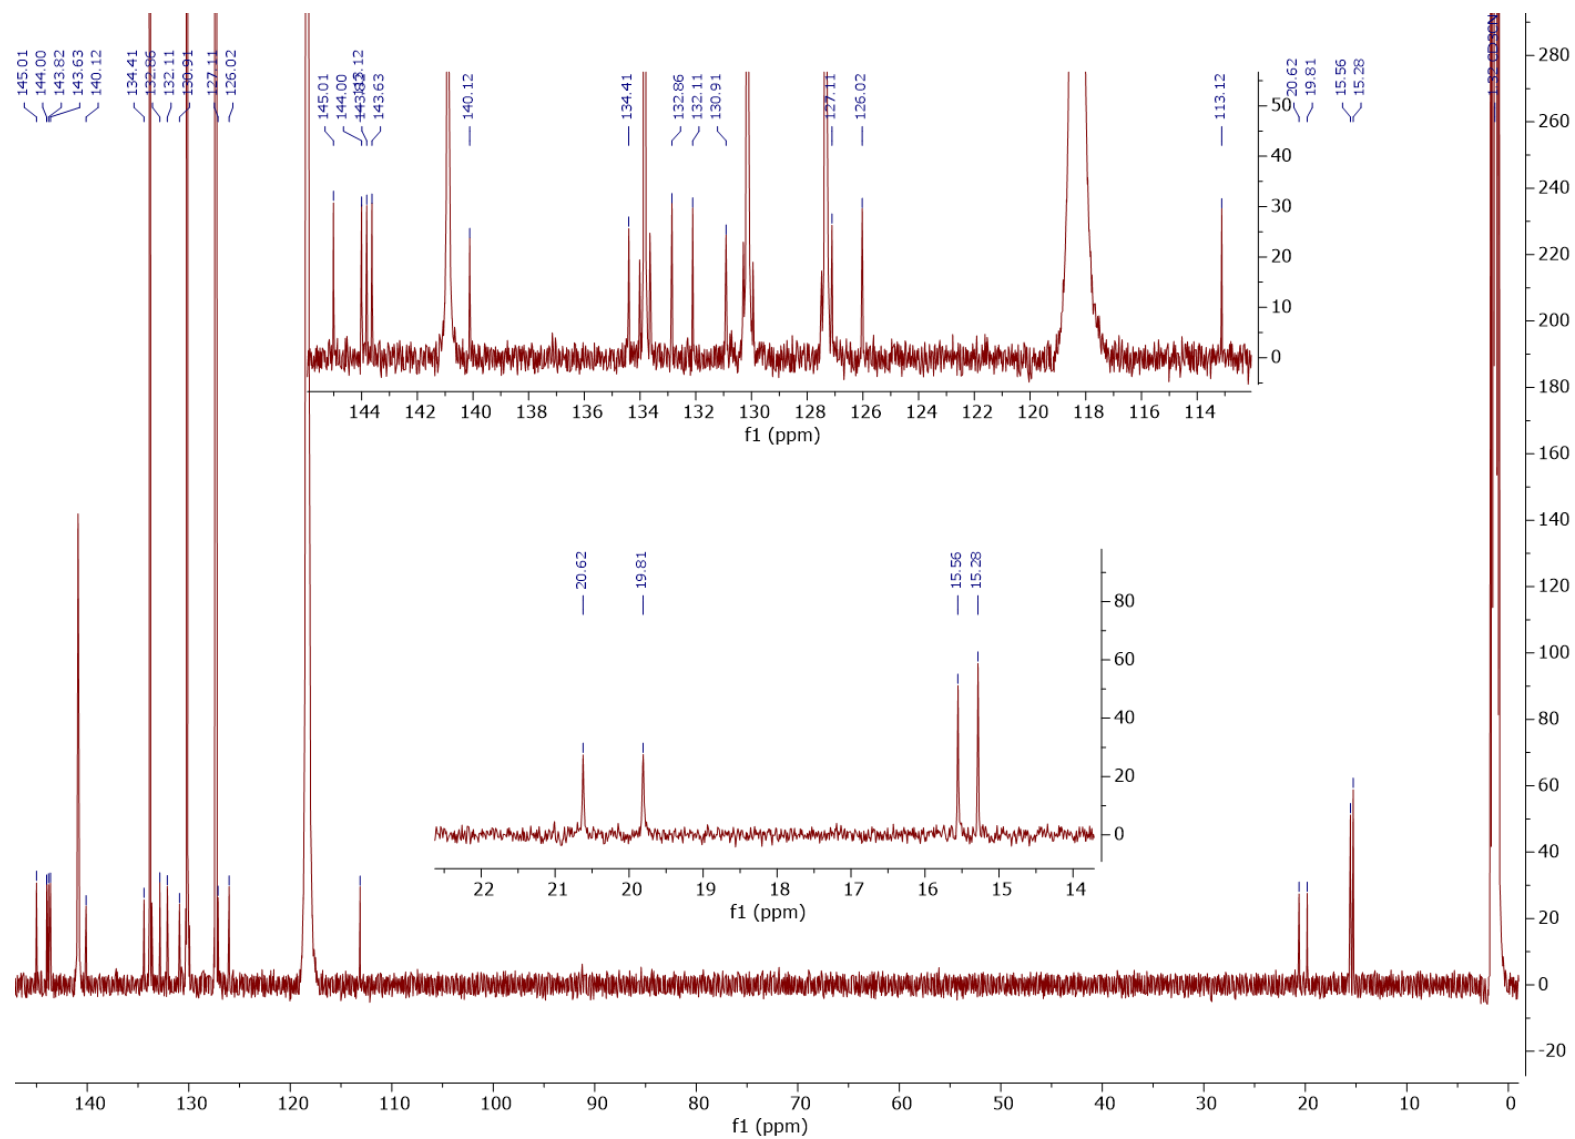

**Figure S3.**  $^{13}\text{C}$  NMR spectrum of  $\alpha,\beta,\alpha,\beta\text{-P1-BSA}$  with expansion of areas of interest (151 MHz, acetonitrile- $d_3$ ,  $25^\circ\text{C}$ ).

## SUPPORTING INFORMATION

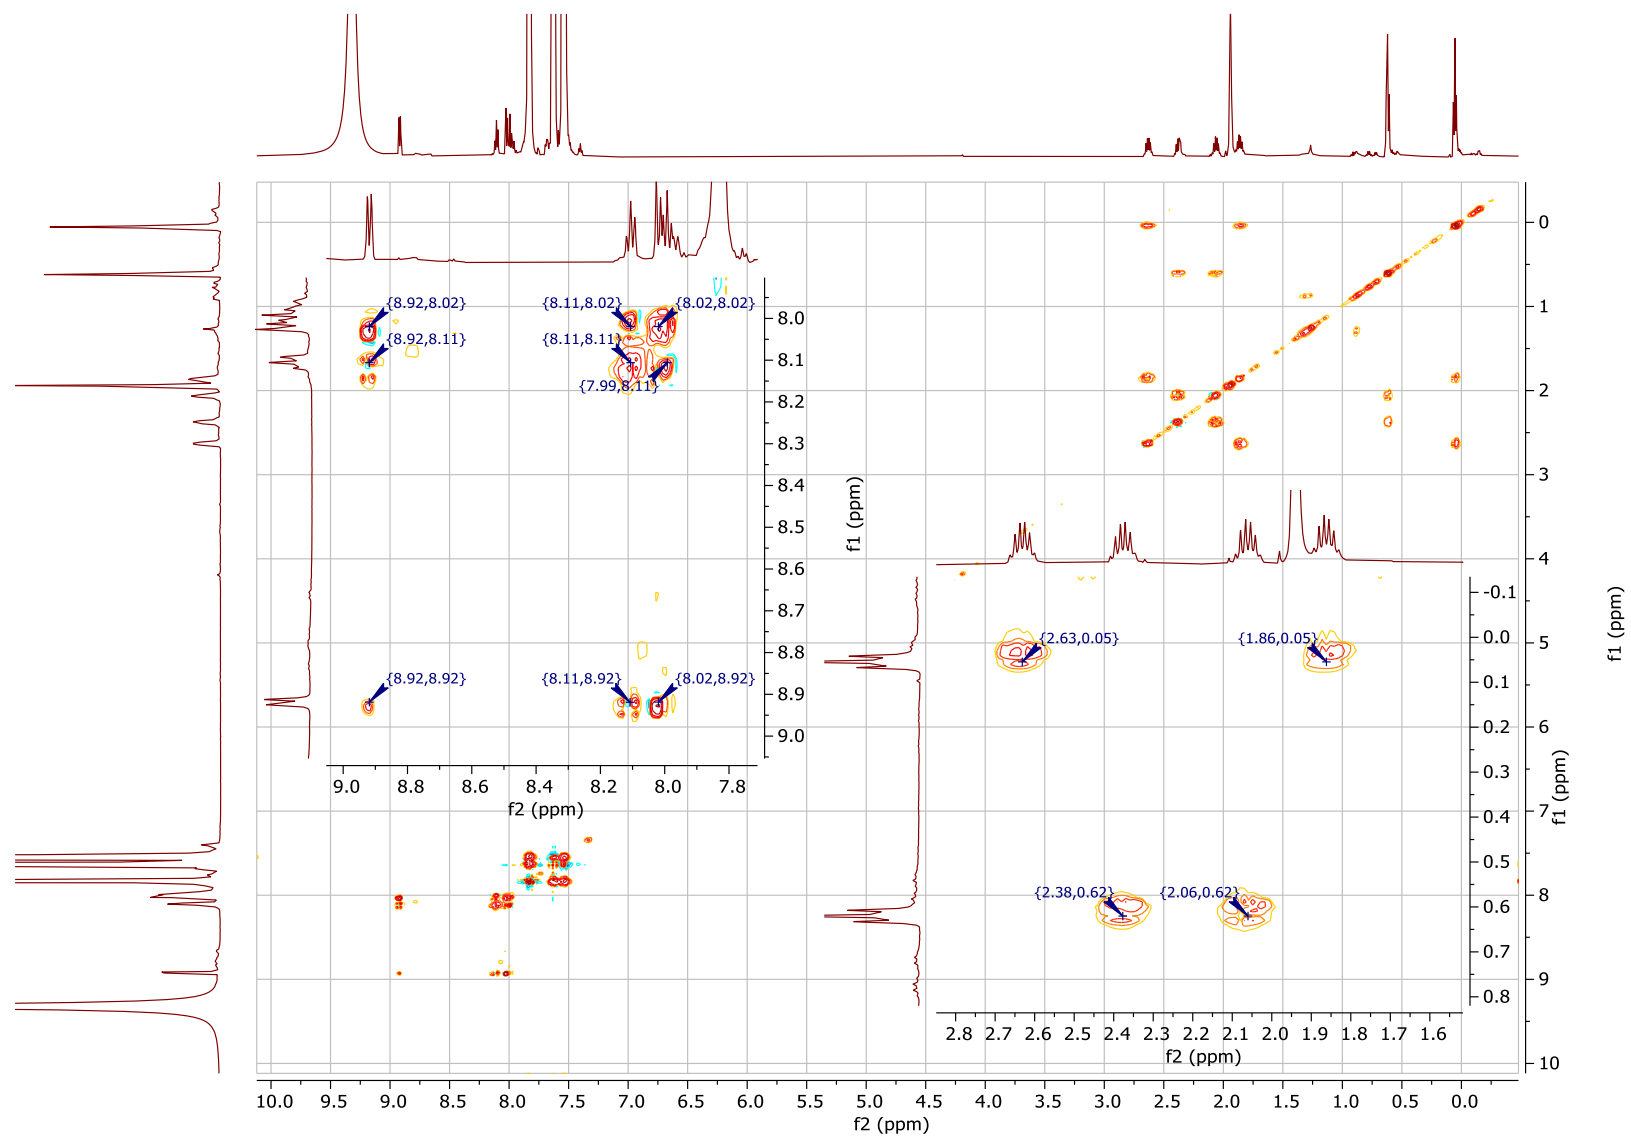

**Figure S4.**  $^1\text{H}$ - $^1\text{H}$  TOCSY spectrum of  $\alpha,\beta,\alpha,\beta$ -P1-BSA with expansion of areas of interest (acetonitrile- $d_3$ , 25 °C).

## SUPPORTING INFORMATION

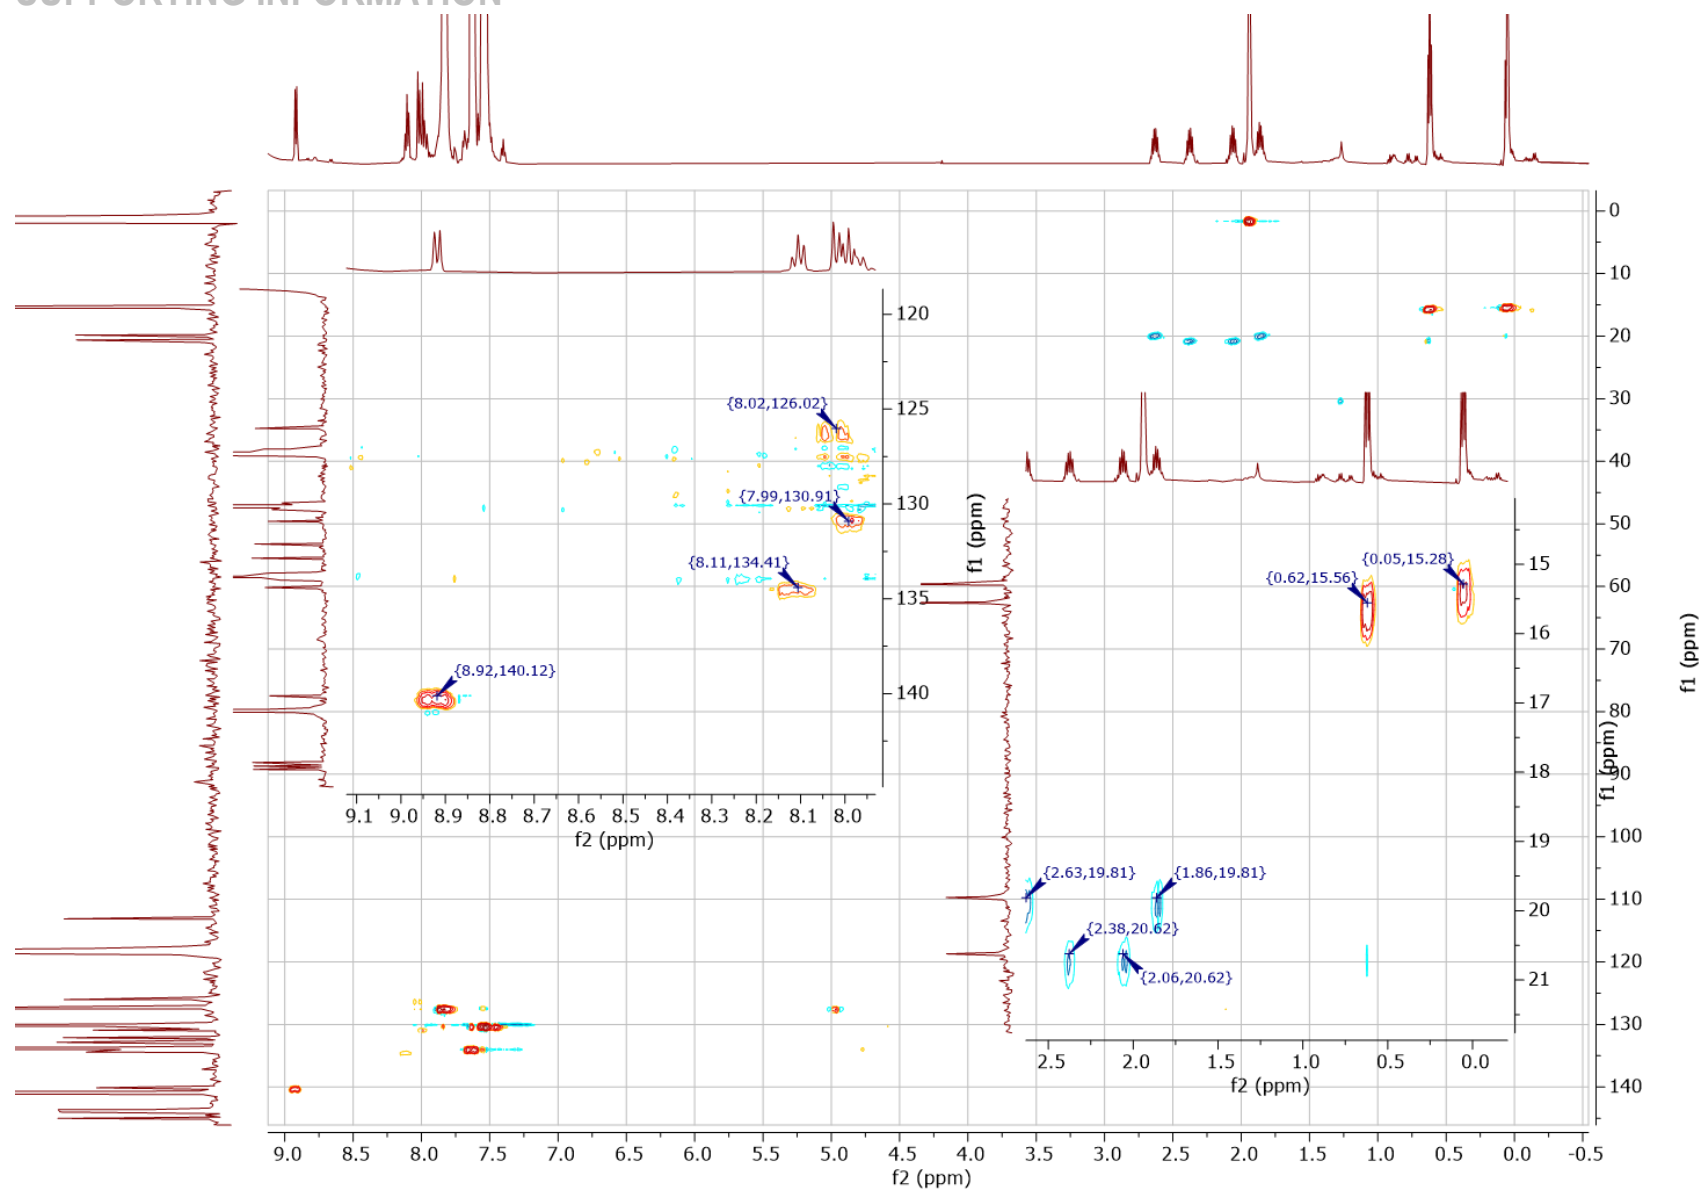

**Figure S5.**  $^1\text{H}$ - $^{13}\text{C}$  HSQC spectrum of  $\alpha,\beta,\alpha,\beta$ -P1-BSA with expansion of areas of interest (acetonitrile- $d_3$ , 25 °C).



## SUPPORTING INFORMATION

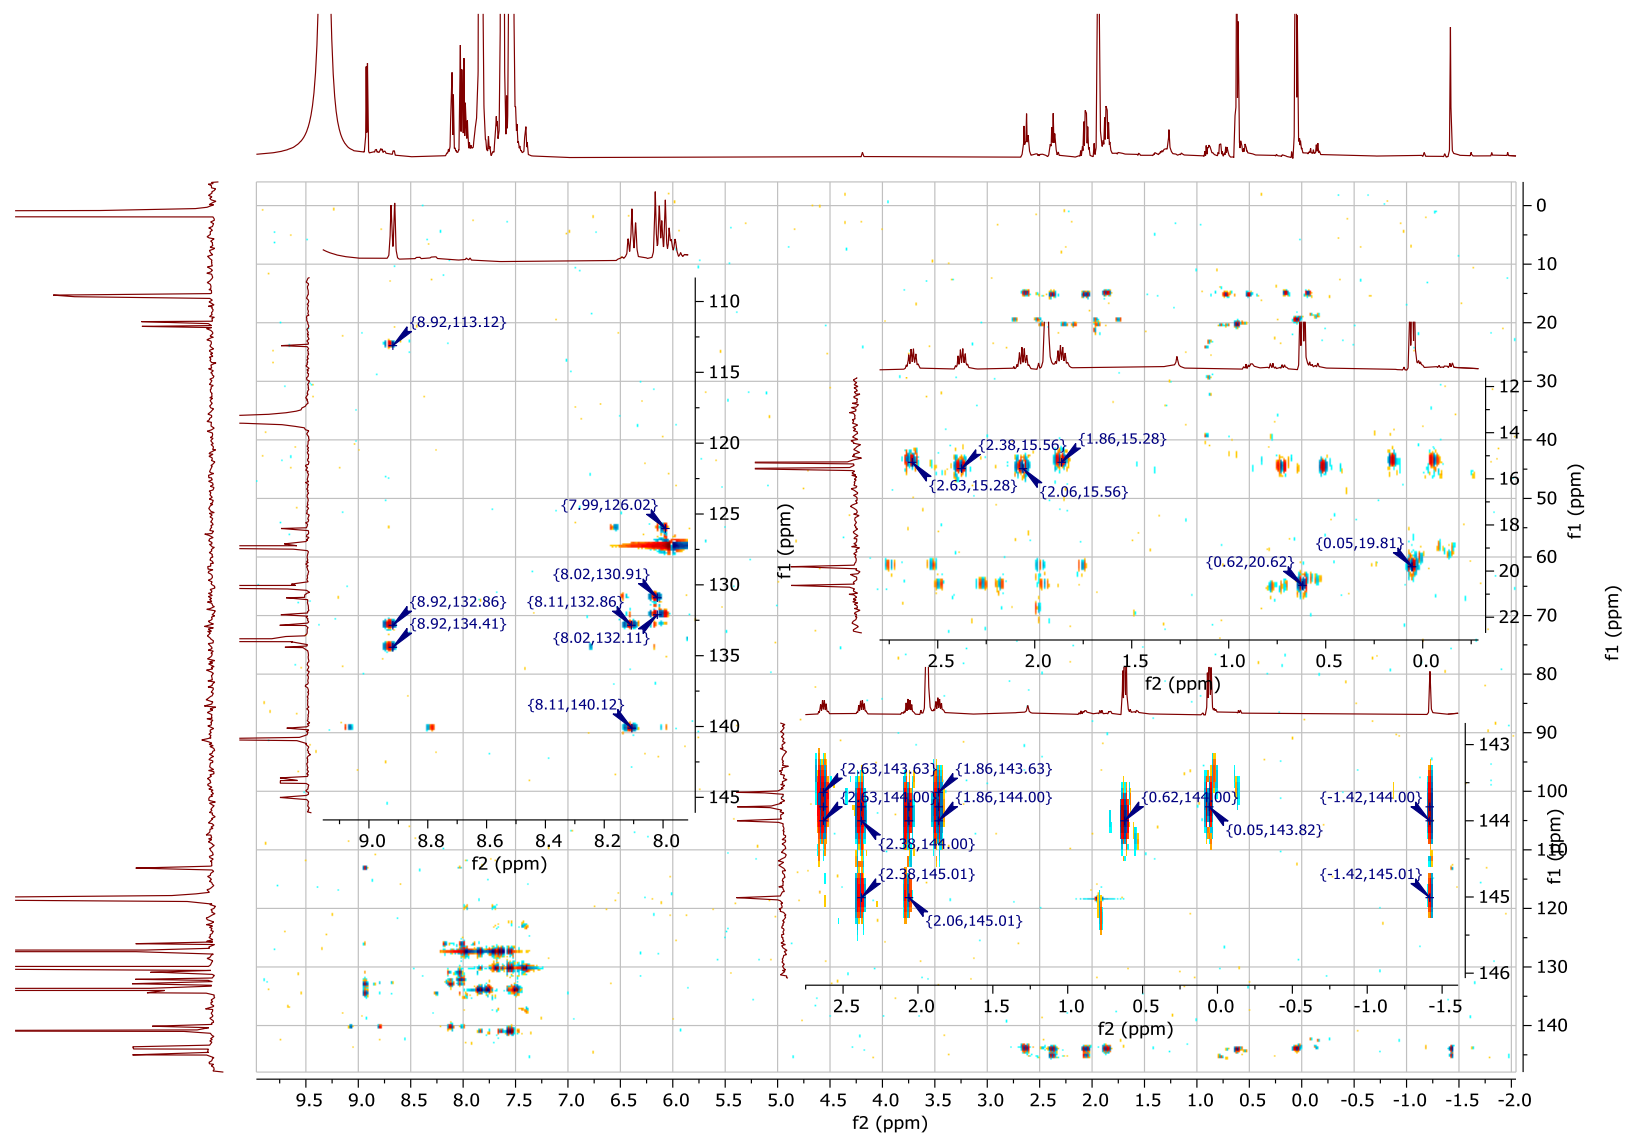

**Figure S6.**  $^1\text{H}$ - $^{13}\text{C}$  HMBC spectrum of  $\alpha,\beta,\alpha,\beta$ -P1-BSA with expansion of areas of interest (acetonitrile- $d_3$ , 25 °C).

## SUPPORTING INFORMATION

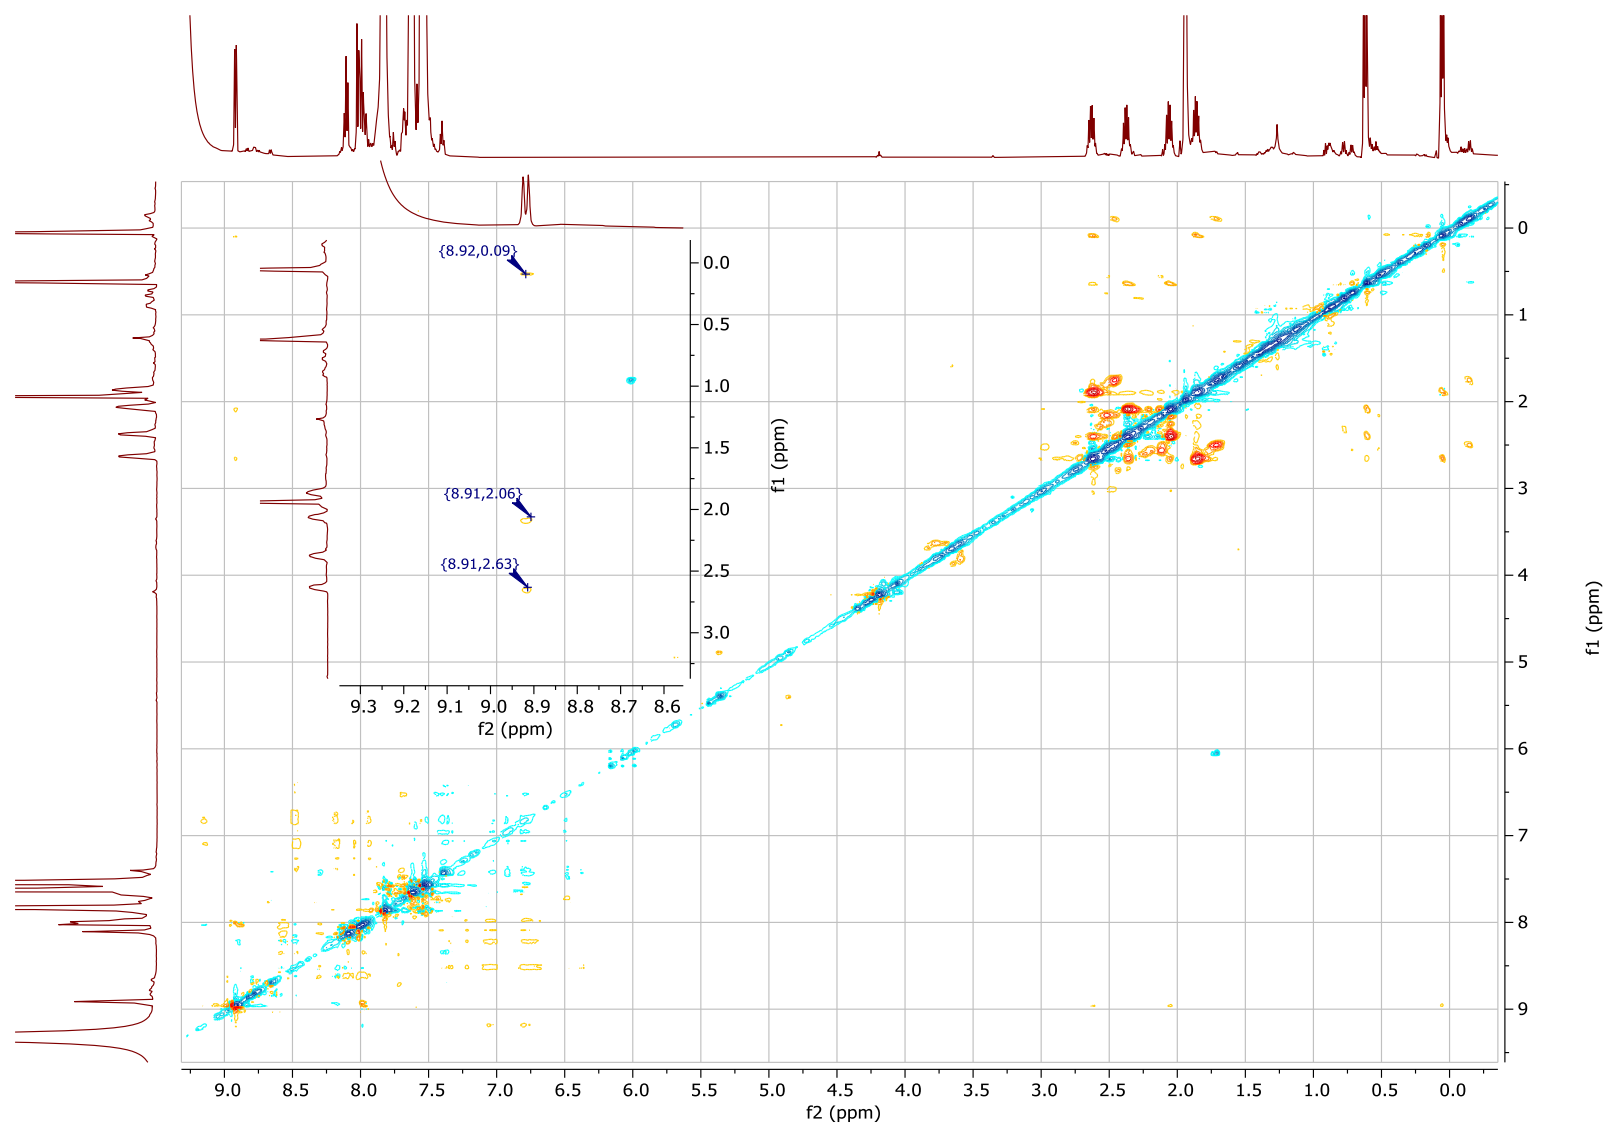

**Figure S7.**  $^1\text{H}$ - $^1\text{H}$  ROESY spectrum of  $\alpha,\beta,\alpha,\beta$ -P1-BSA with expansion of areas of interest (acetonitrile- $d_3$ , 25 °C).

## SUPPORTING INFORMATION

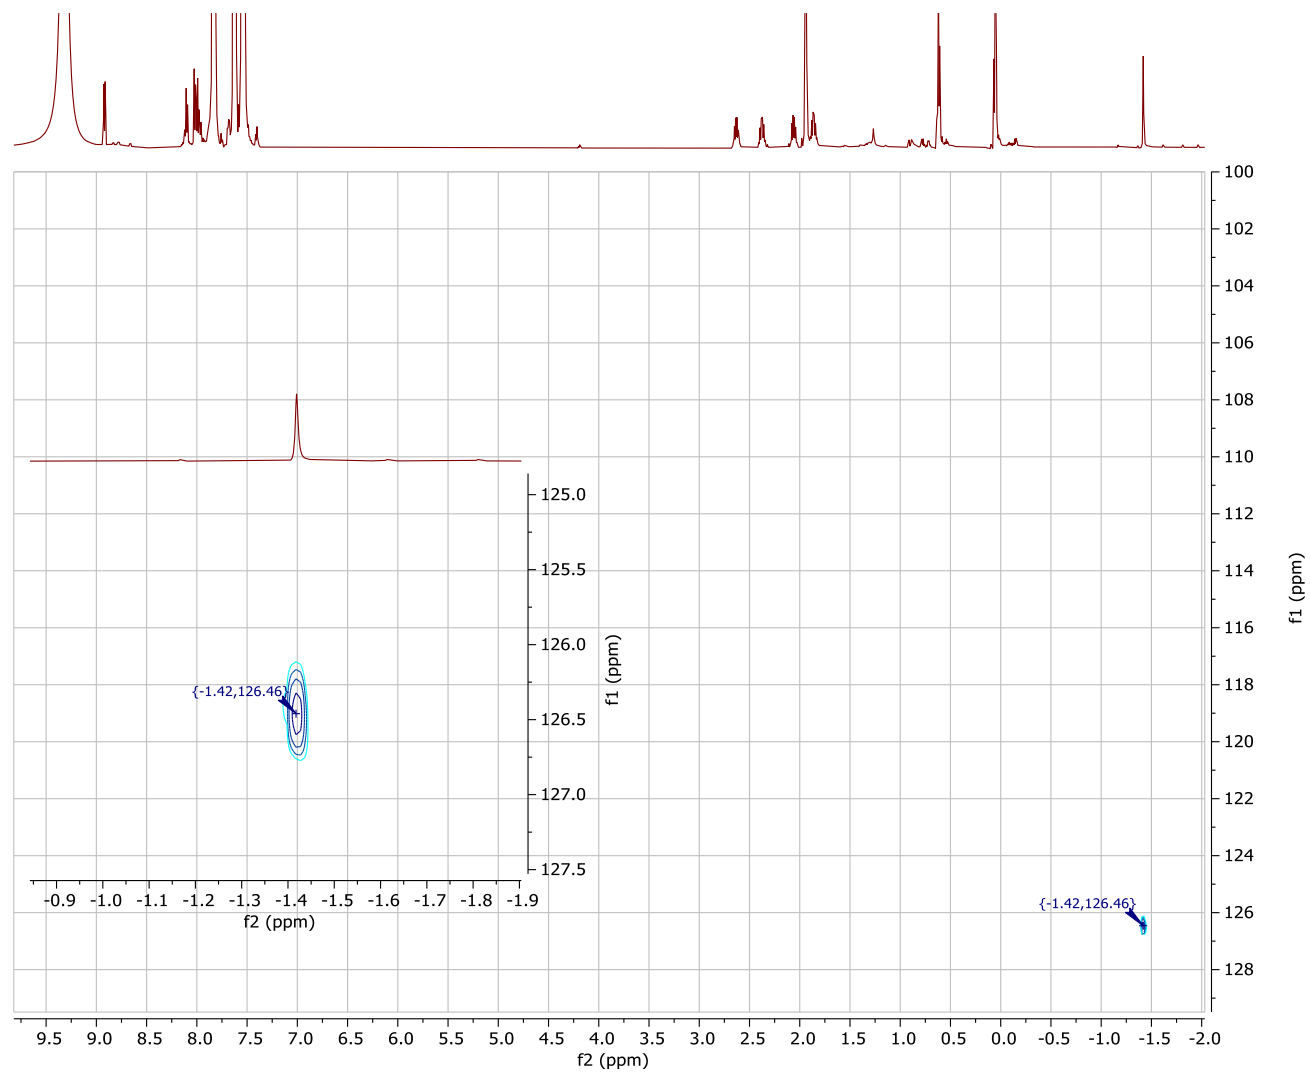

**Figure S8.**  $^1\text{H}$ - $^{15}\text{N}$  HSQC spectrum of  $\alpha,\beta,\alpha,\beta$ -P1-BSA with expansion of areas of interest (acetonitrile- $d_3$ , 25 °C).

## SUPPORTING INFORMATION

Synthesis and Characterization of  $\alpha_2\beta_2$ -P1-BSA

**$\alpha,\alpha,\beta,\beta$ -5,10,15,20-Tetrakis(2-aminiumphenyl)-2,3,7,8,12,13,17,18-octaethyl-porphyrin hexa-benzenesulfonic acid salt ( $\alpha_2\beta_2$ -P1-BSA).** In a sample tube benzene sulfonic acid (0.82 mg; 0.25 mmol; 50 eq.) was dissolved in 1 mL of acetonitrile- $d_3$ . Isomerically pure  $\alpha,\alpha,\beta,\beta$ -5,10,15,20-tetrakis(2-aminophenyl)-2,3,7,8,12,13,17,18-octaethylporphyrinato]nickel(II) (5 mg; 0.005 mmol; 1 eq.) was added in one batch and stirred for 16 hours. The completion of demetalation followed by complex formation was identified by a distinct color change (maroon to green) of the solution.  $^1\text{H}$  NMR (600 MHz, acetonitrile- $d_3$ )  $\delta$  = 8.74 (d,  $J$  = 7.4 Hz, 2H, Ar- $H$  (a)), 8.66 (d,  $J$  = 7.4 Hz, 2H, Ar- $H$  (b)), 8.12 (t,  $J$  = 8.0 Hz, 2H, Ar- $H$  (b)), 8.08 (t,  $J$  = 7.8 Hz, 2H, Ar- $H$  (a)), 8.06 (d,  $J$  = 8.0 Hz, 2H, Ar- $H$  (b)), 8.03 (t,  $J$  = 7.5 Hz, 2H, Ar- $H$  (b)), 7.94 (d,  $J$  = 8.1 Hz, 2H, Ar- $H$  (a)), 7.90 (t,  $J$  = 8.1 Hz, 2H, Ar- $H$  (a)), 2.63 (dq,  $J$  = 14.4, 7.1 Hz, 2H,  $\text{CH}_2$  (c)), 2.50 (dq,  $J$  = 15.2, 7.6 Hz, 2H,  $\text{CH}_2$  (a)), 2.46 (dq,  $J$  = 30.2, 15.2, 7.6 Hz, 2H,  $\text{CH}_2$  (d)), 2.37 (dq,  $J$  = 14.7, 7.4 Hz, 2H,  $\text{CH}_2$  (b)), 2.19 (dq,  $J$  = 14.8, 7.5 Hz, 2H,  $\text{CH}_2$  (a)), 2.09 (dq,  $J$  = 14.7, 7.3 Hz, 2H,  $\text{CH}_2$  (d)), 1.85 (dq,  $J$  = 14.8, 7.4 Hz, 2H,  $\text{CH}_2$  (c)), 1.66 (dq,  $J$  = 15.0, 7.4 Hz, 2H,  $\text{CH}_2$  (d)), 0.71 (t,  $J$  = 7.5 Hz, 6H,  $\text{CH}_3$  (a)), 0.67 (t,  $J$  = 7.6 Hz, 6H,  $\text{CH}_3$  (c)), -0.04 (t,  $J$  = 7.4 Hz, 6H,  $\text{CH}_3$  (d)), -0.19 (t,  $J$  = 7.5 Hz, 6H,  $\text{CH}_3$  (b)), -1.11 (s, 2H, N- $H$  (c)), -1.40 (s, 1H, N- $H$  (b)), -2.18 (s, 1H, N- $H$  (a));  $^{13}\text{C}$  NMR (151 MHz, acetonitrile- $d_3$ , 25 °C)  $\delta$  = 145.59 ( $\beta$ -pyrrole (a)), 144.88 ( $\alpha$ -pyrrole (a)), 144.65 ( $\alpha$ -pyrrole (c)), 144.12 ( $\alpha$ -pyrrole (d)), 143.94 ( $\beta$ -pyrrole (c)), 142.92 ( $\beta$ -pyrrole (b)), 142.76 ( $\alpha$ -pyrrole (b)), 142.03 ( $\beta$ -pyrrole (d)), 140.37 (Ar (a)), 139.81 (Ar (b)), 134.19 (Ar (a)), 134.19 (Ar (b)), 133.1 (Ar (b)), 133 (Ar (a)), 132.12 (Ar (b)), 132.02 (Ar (a)), 130.63 (Ar (b)), 130.5 (Ar (a)), 126.36 (Ar (b)), 125.93 (Ar (a)), 114.85 (meso- (b)), 111.95 (meso- (a)), 20.76 ( $\text{CH}_2$  (a)), 20.48 ( $\text{CH}_2$  (c)), 19.1 ( $\text{CH}_2$  (b)), 19.1 ( $\text{CH}_2$  (d)), 15.92 ( $\text{CH}_3$  (b)), 15.87 ( $\text{CH}_3$  (d)), 15.37 ( $\text{CH}_3$  (a)), 15.19 ( $\text{CH}_3$  (c)) ppm.;  $^{15}\text{N}$  NMR (61 MHz, acetonitrile- $d_3$ )  $\delta$  = 125.84 (N- $H$  (c)), 127.23 (N- $H$  (b)), 126.94 (N- $H$  (a)) ppm.

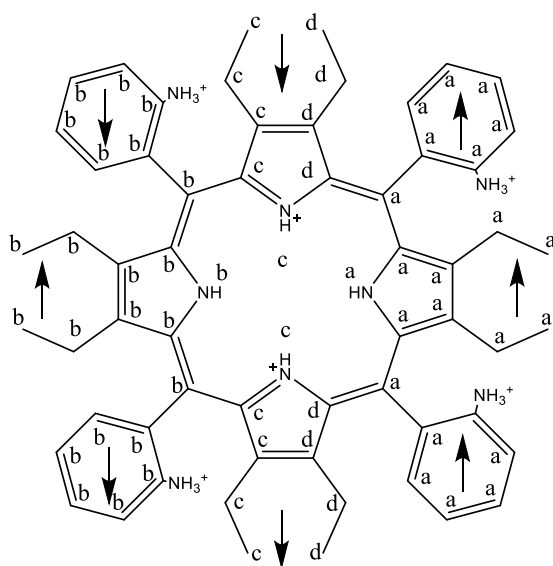

**Figure S9.** Structure of  $\alpha_2\beta_2$ -P1-BSA highlighting the positions used in NMR characterizations.

## SUPPORTING INFORMATION

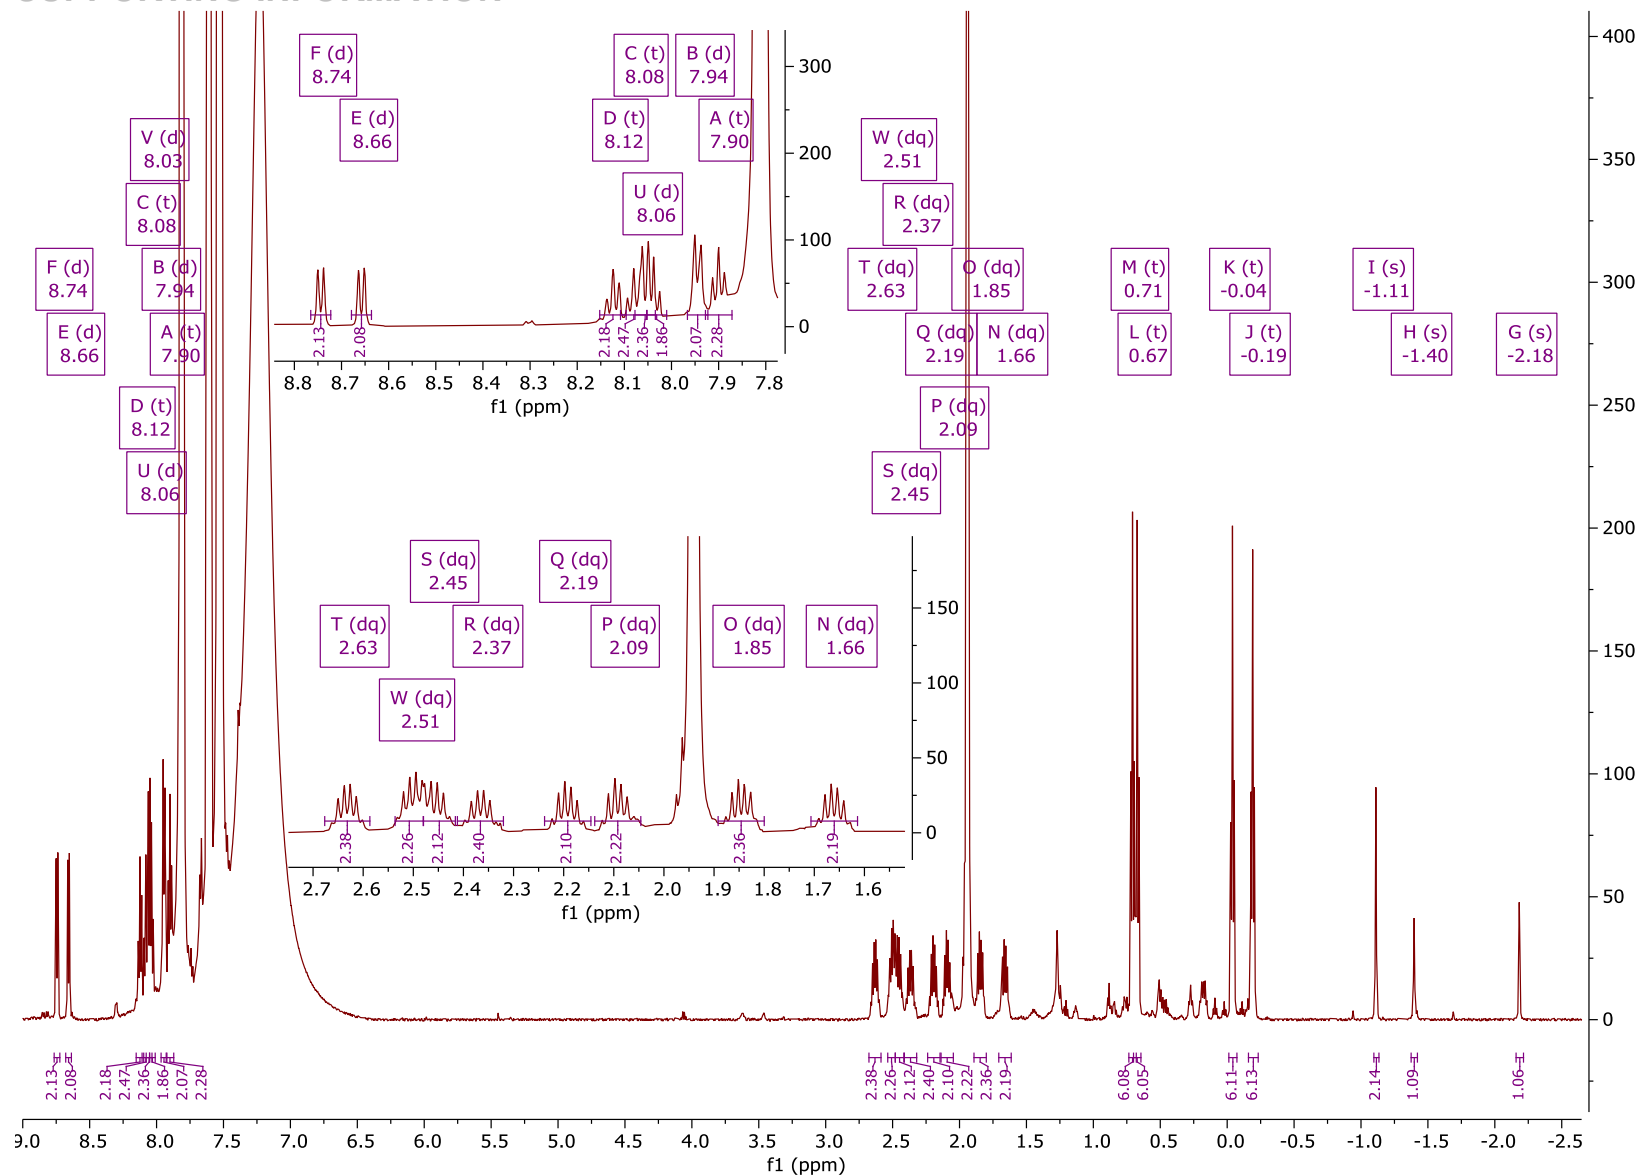

**Figure S10.**  $^1\text{H}$  NMR spectrum of  $\alpha_2\beta_2\text{-P1-BSA}$  with expansion of areas of interest (600 MHz,  $\text{acetonitrile-}d_3$ ,  $25^\circ\text{C}$ ).

## SUPPORTING INFORMATION

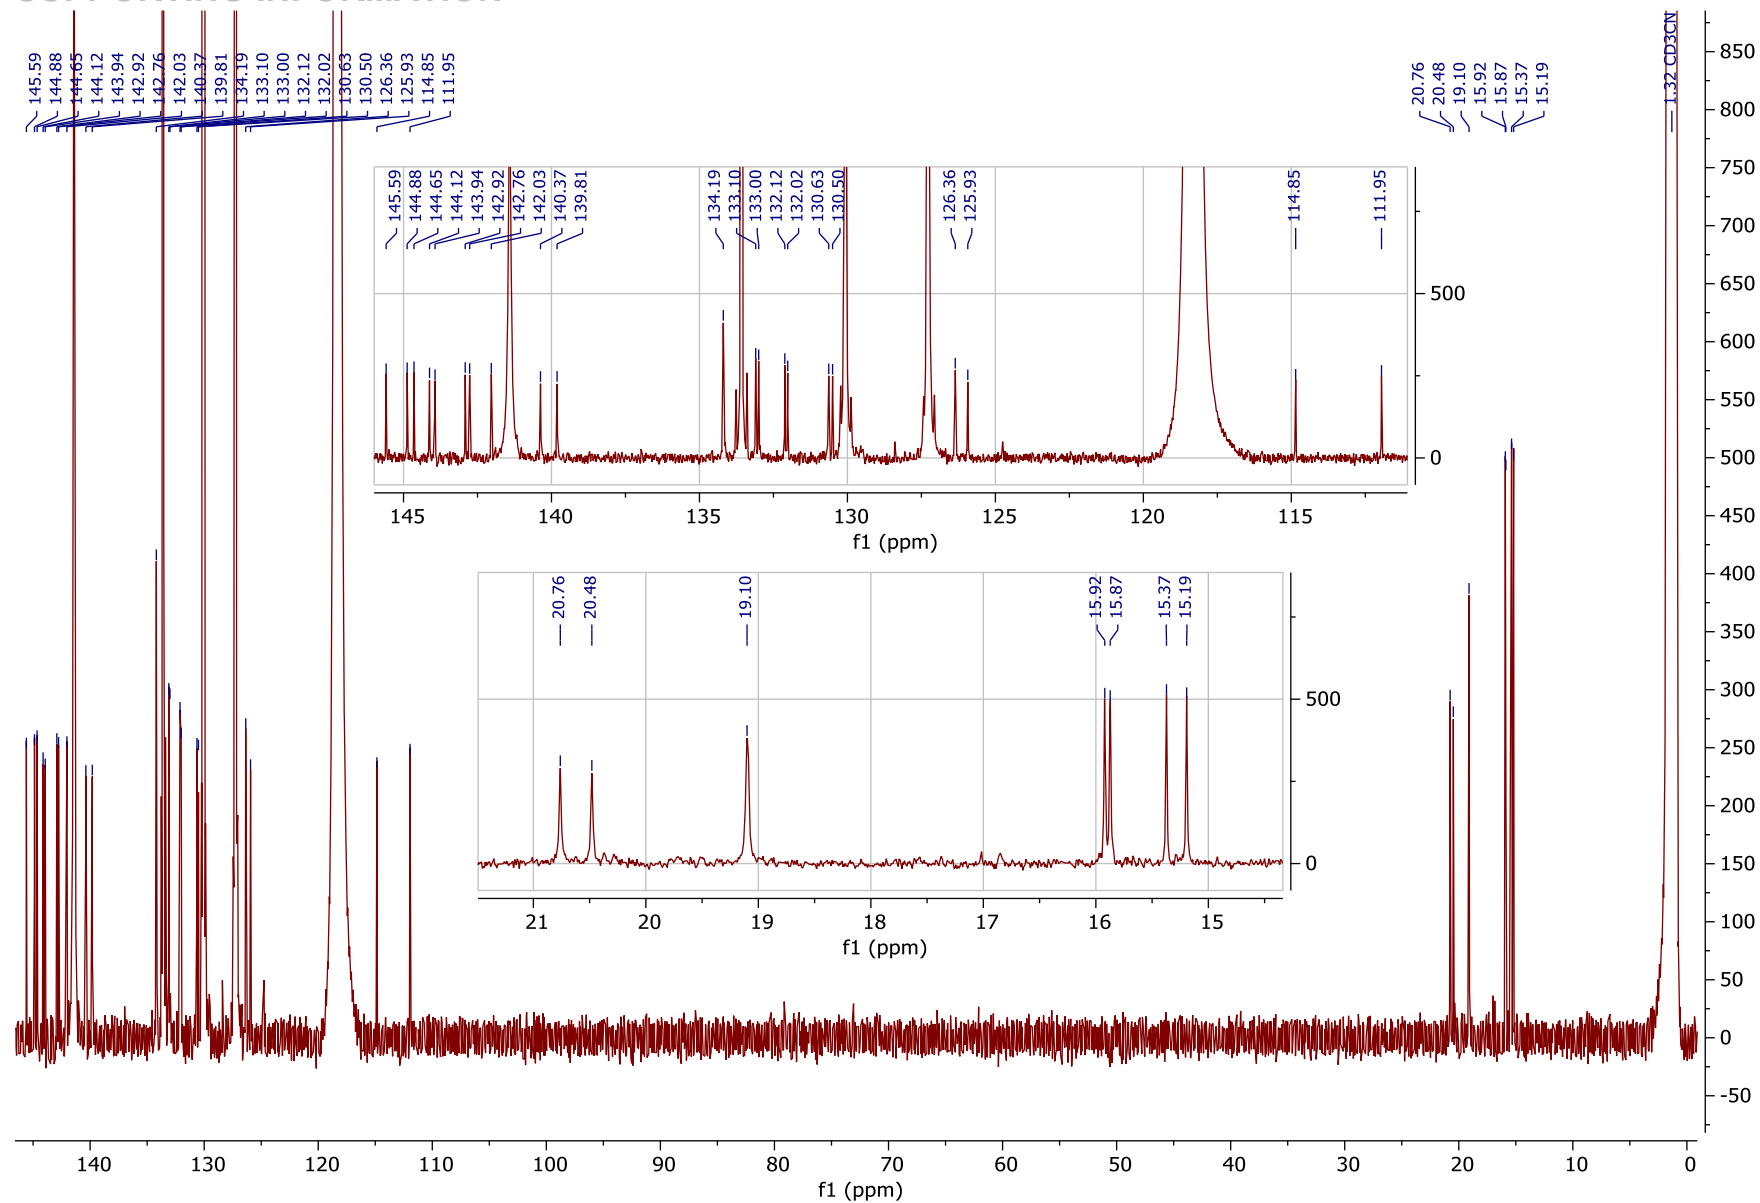

Figure S11.  $^{13}\text{C}$  NMR spectrum of  $\alpha_2,\beta_2$ -P1-BSA with expansion of areas of interest (151 MHz, acetonitrile- $d_3$ , 25 °C).

## SUPPORTING INFORMATION

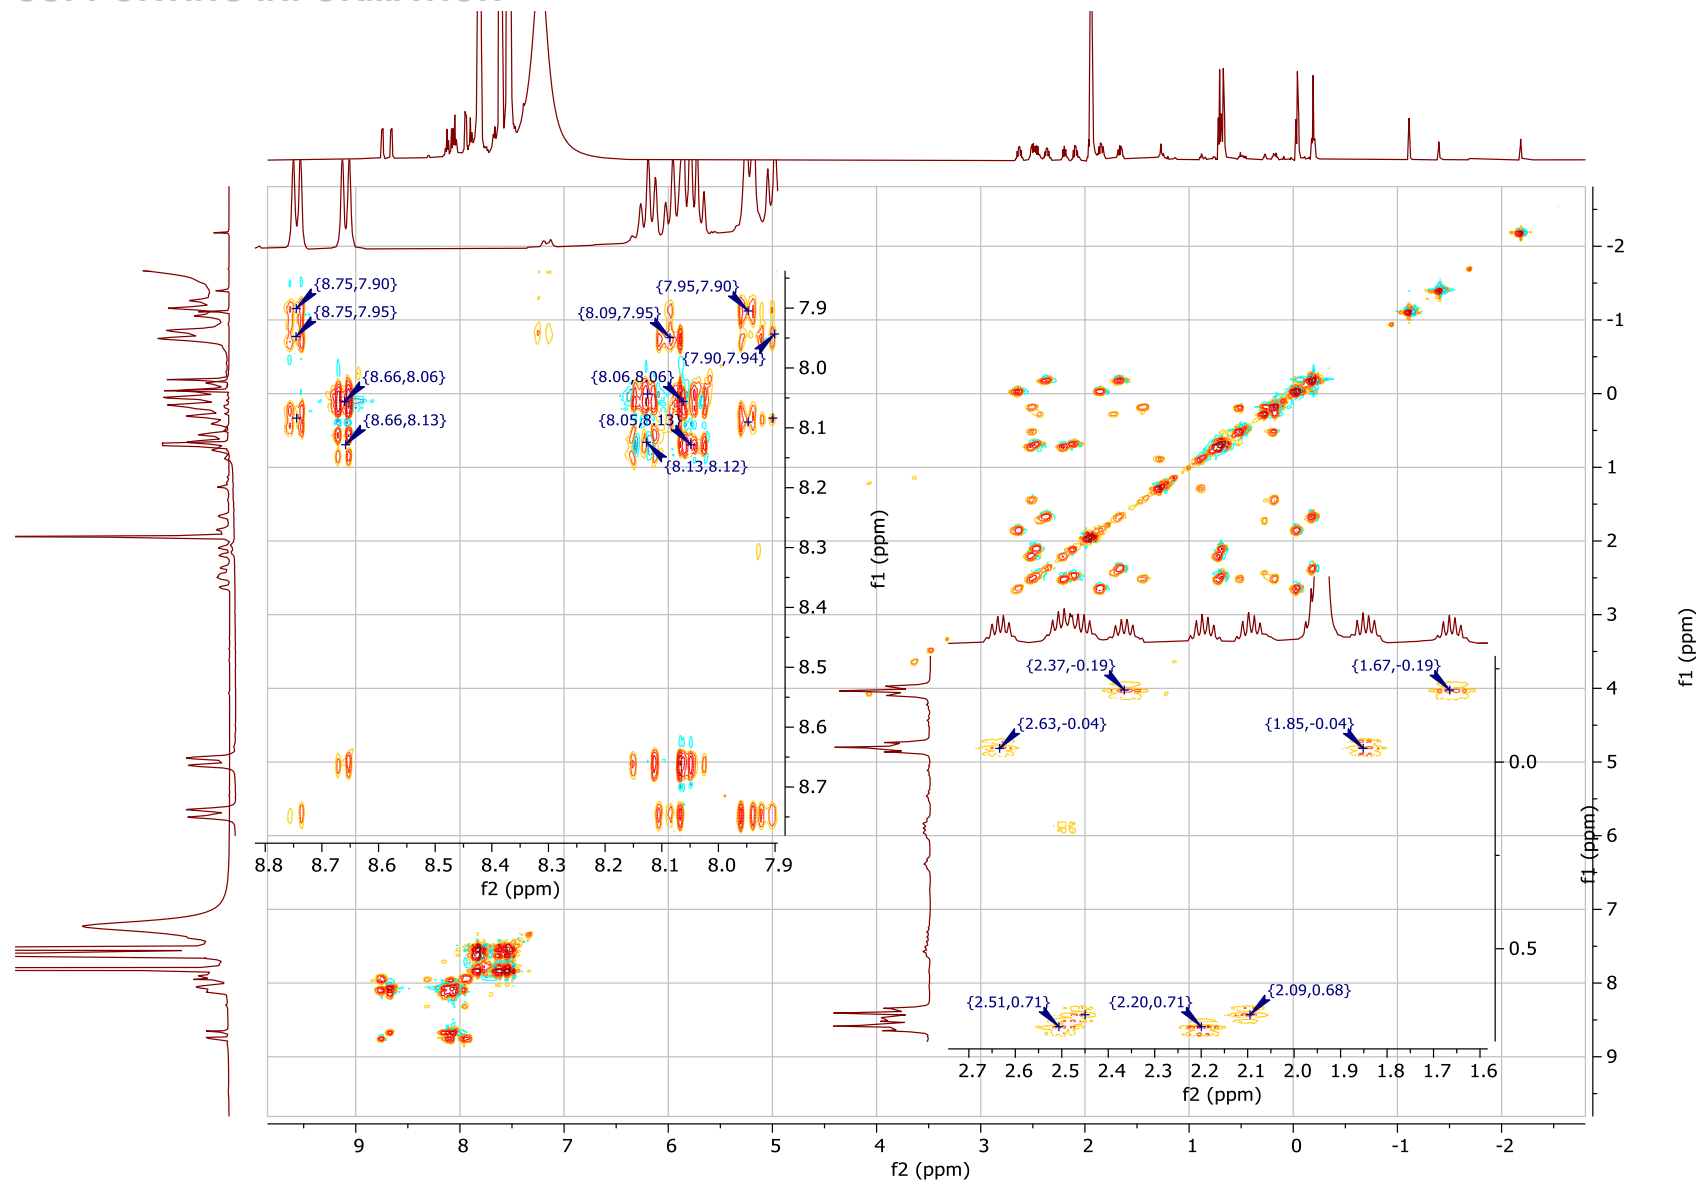

**Figure S12.**  $^1\text{H}$ - $^1\text{H}$  TOCSY spectrum of  $\alpha_2\beta_2$ -P1-BSA with expansion of areas of interest (acetonitrile- $d_3$ , 25 °C).

## SUPPORTING INFORMATION

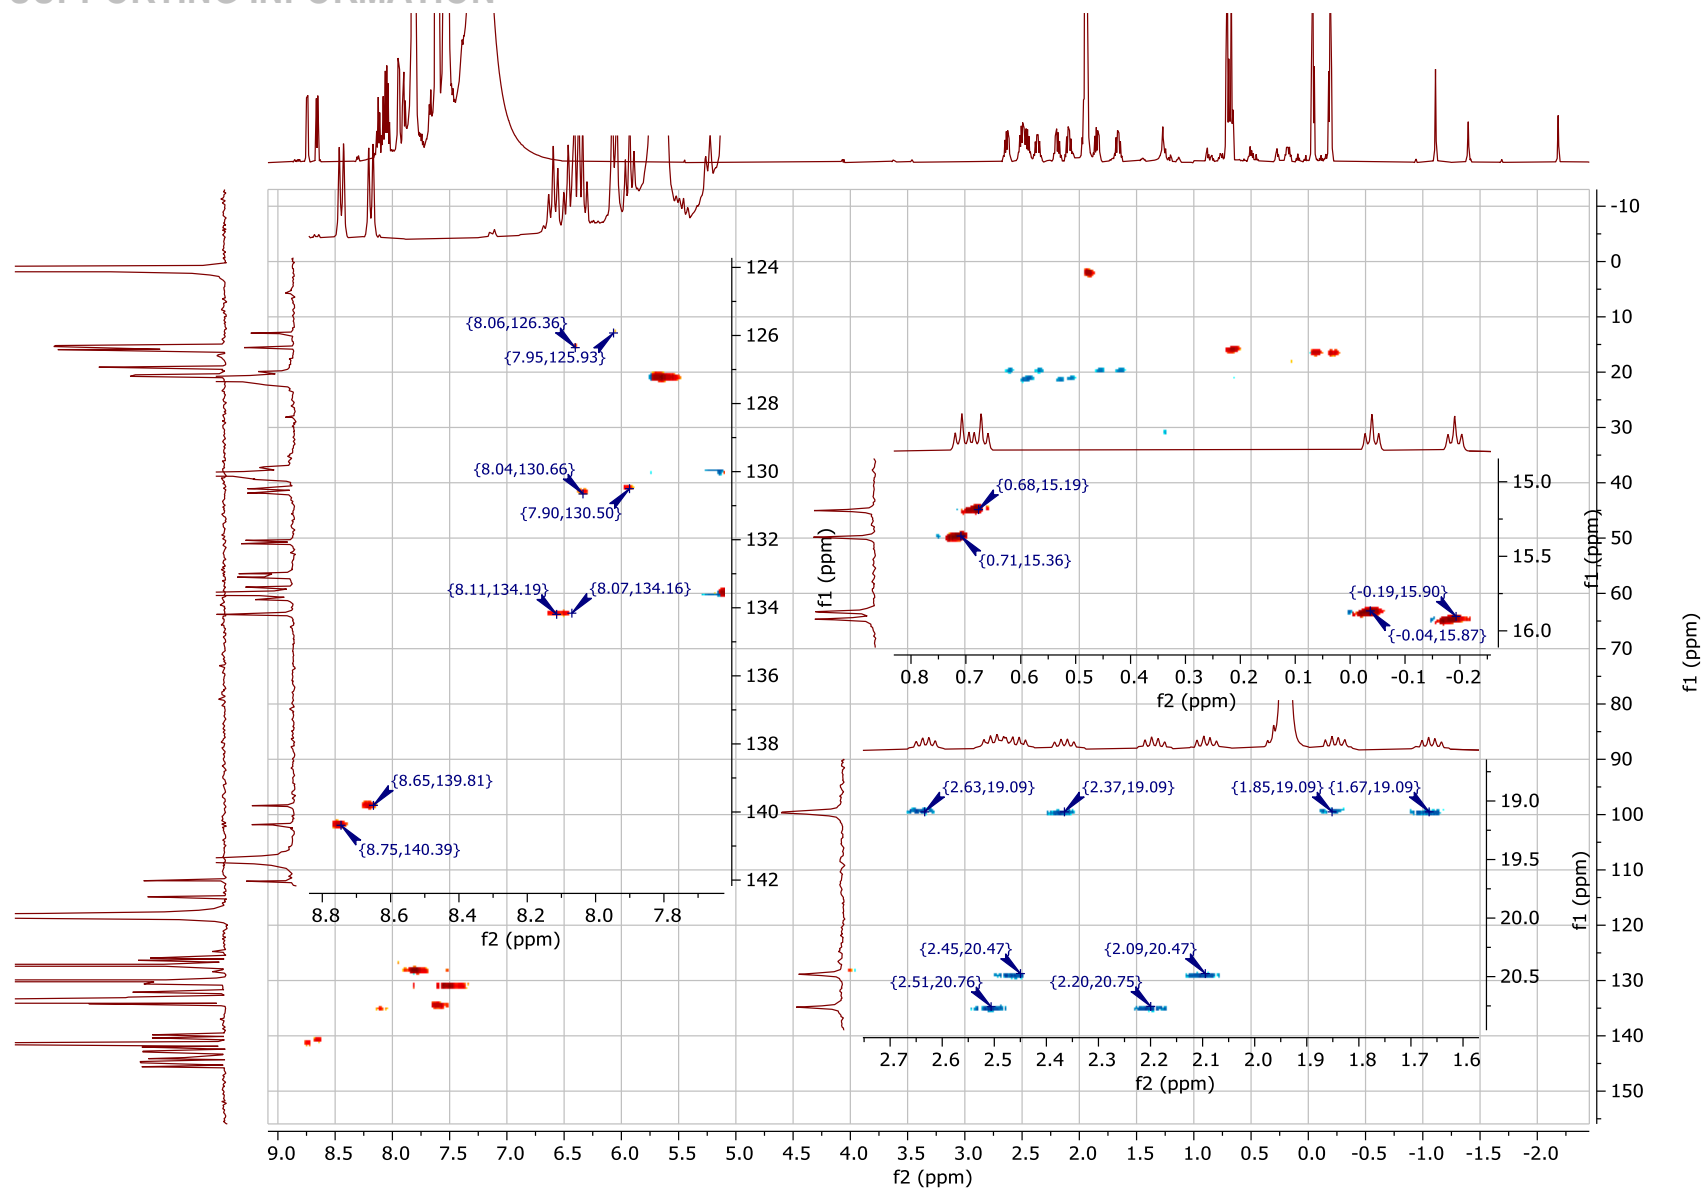

**Figure S13.**  $^1\text{H}$ - $^{13}\text{C}$  HSQC spectrum of  $\alpha_2\beta_2$ -P1-BSA with expansion of areas of interest (acetonitrile- $d_3$ , 25 °C).



## SUPPORTING INFORMATION

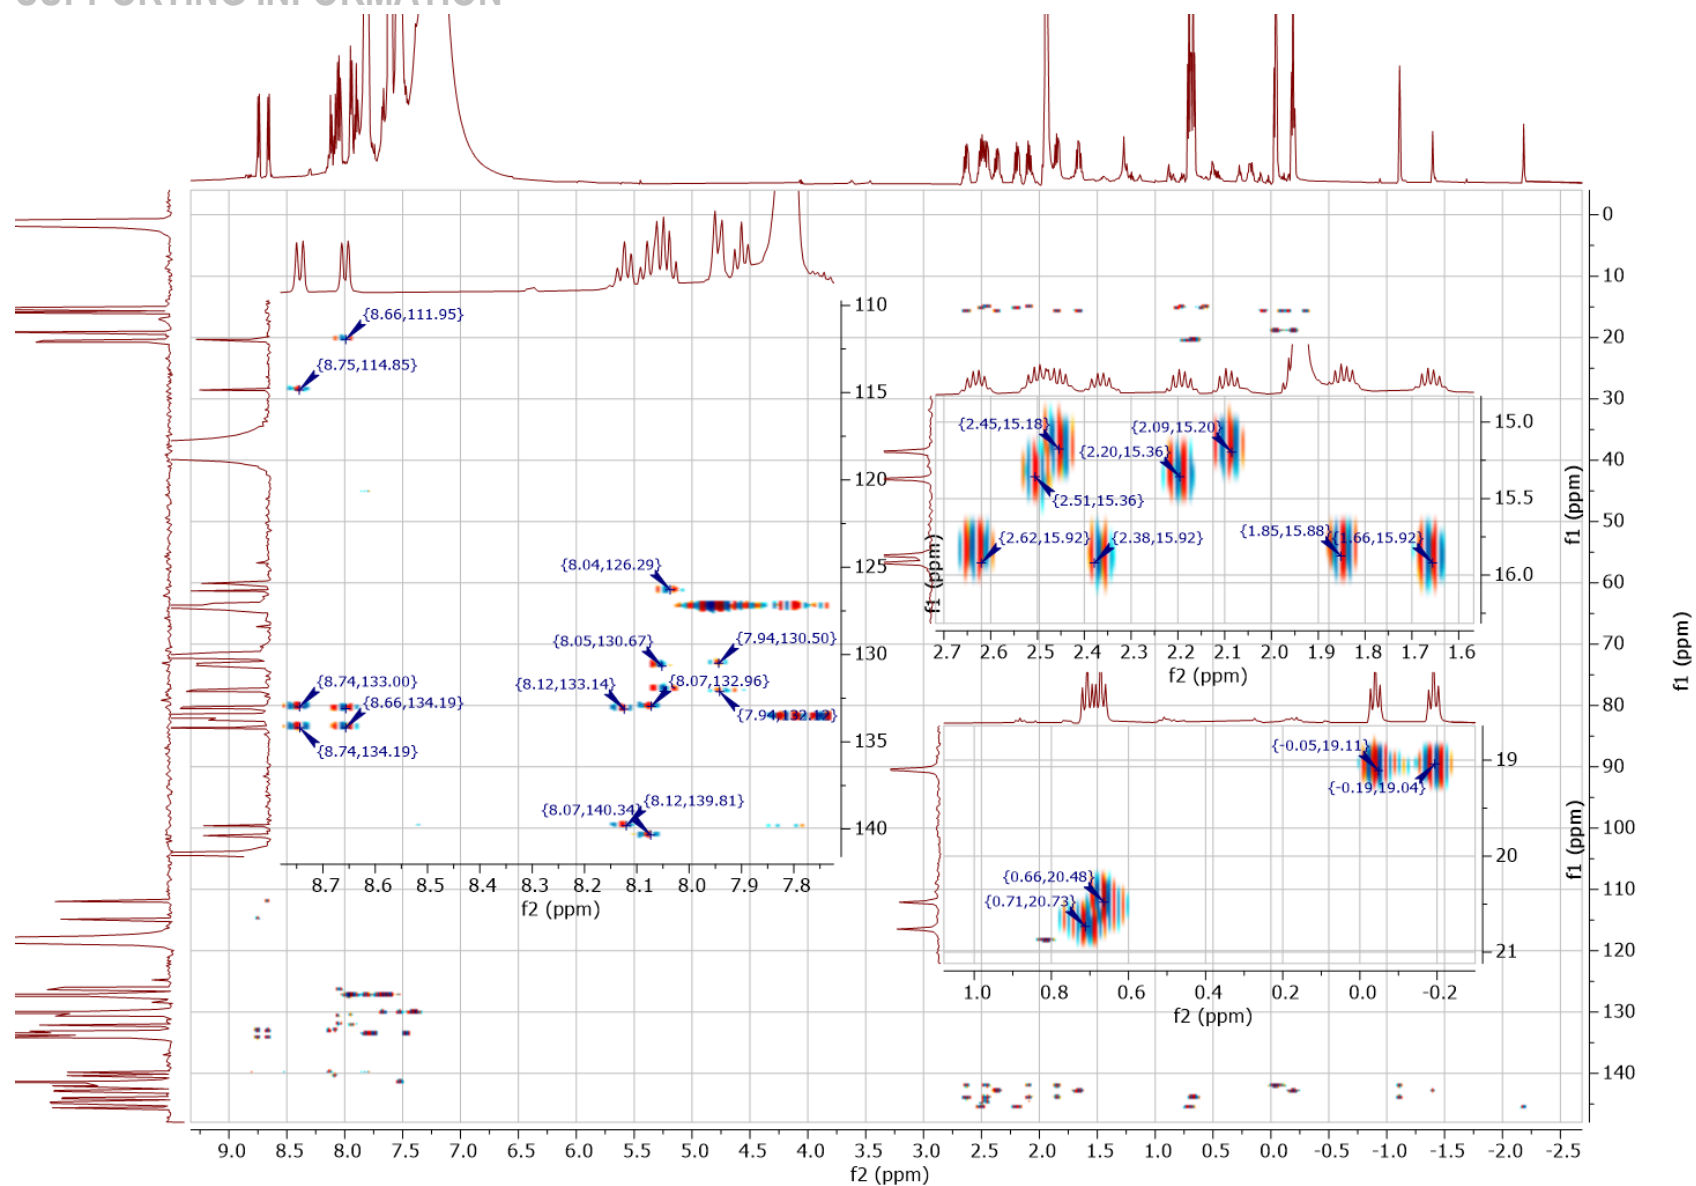

**Figure S14.**  $^1\text{H}$ - $^{13}\text{C}$  HMBC spectrum of  $\alpha_2\beta_2\text{-P1-BSA}$  with expansion of areas of interest (acetonitrile- $d_3$ ,  $25^\circ\text{C}$ ).

## SUPPORTING INFORMATION

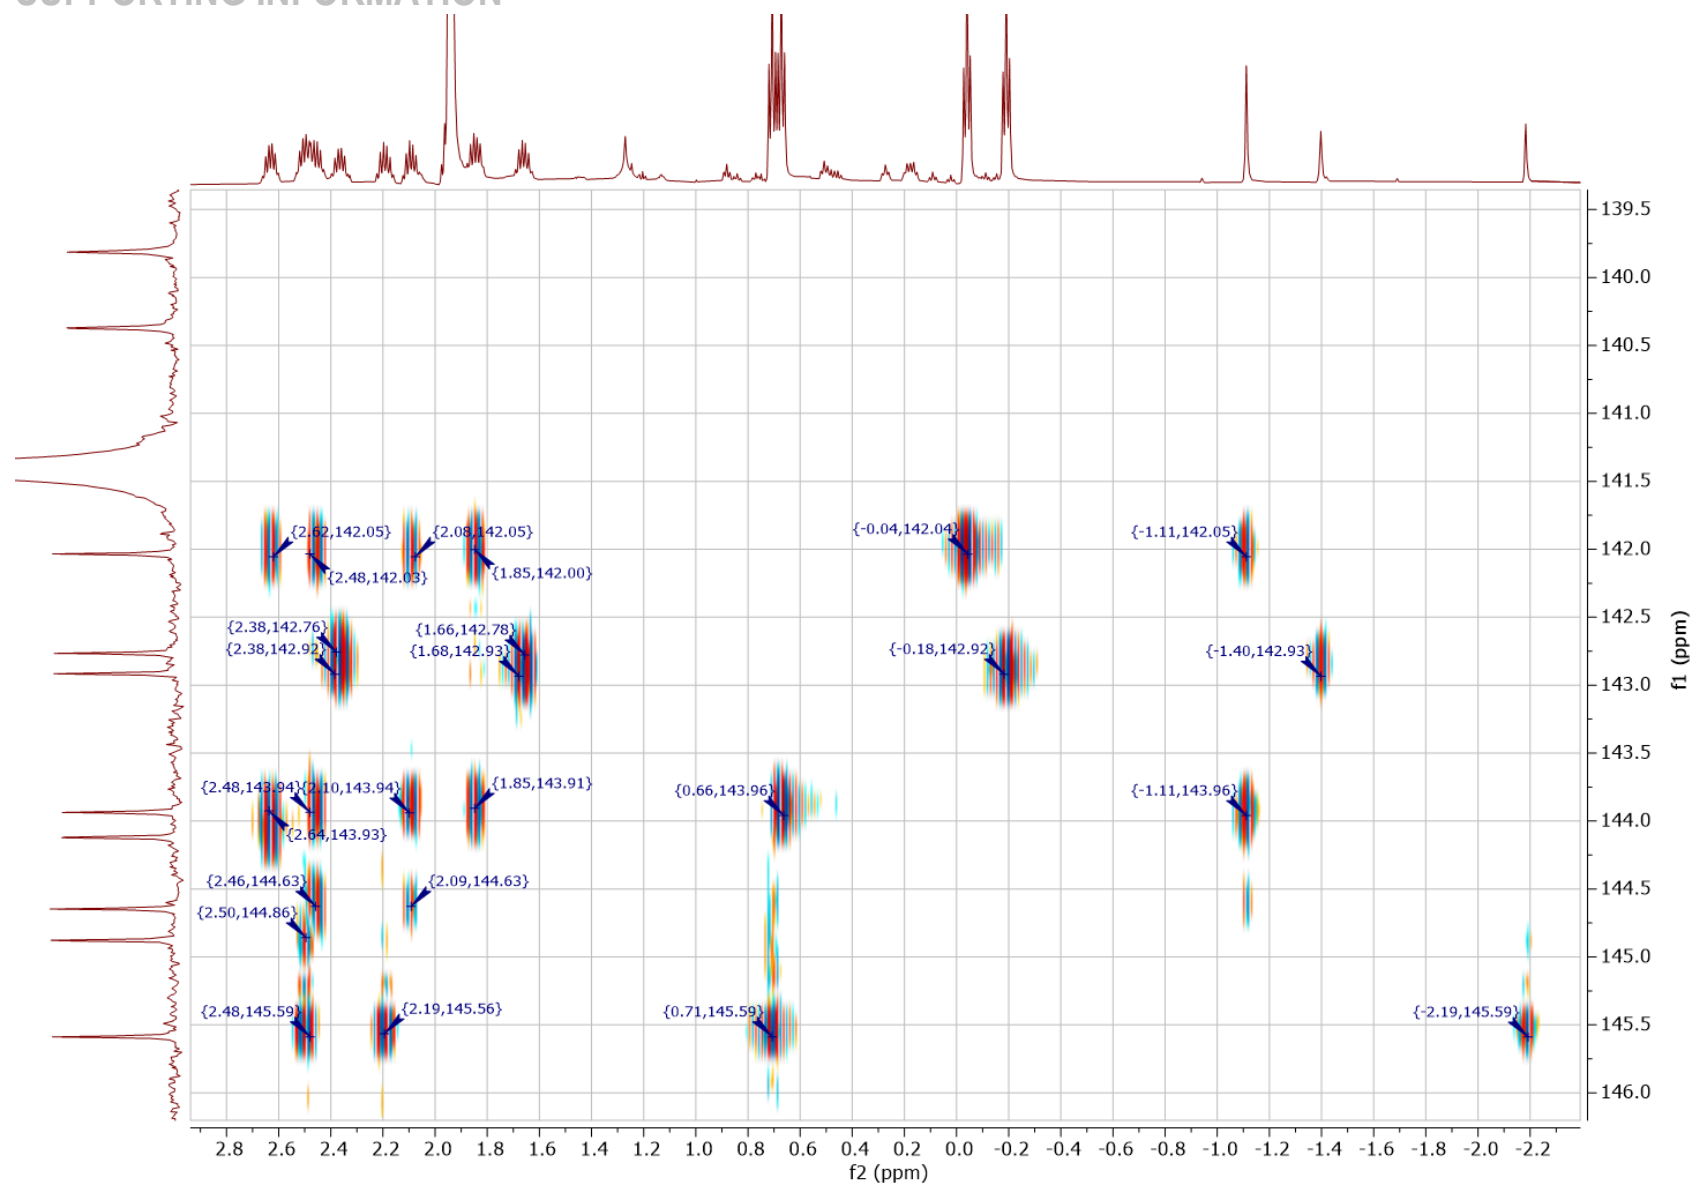

Figure S15.  $^1\text{H}$ - $^{13}\text{C}$  HMBC spectrum, expansion of area of interest of  $\alpha_2, \beta_2$ -P1-BSA (acetonitrile- $d_3$ , 25 °C).

## SUPPORTING INFORMATION

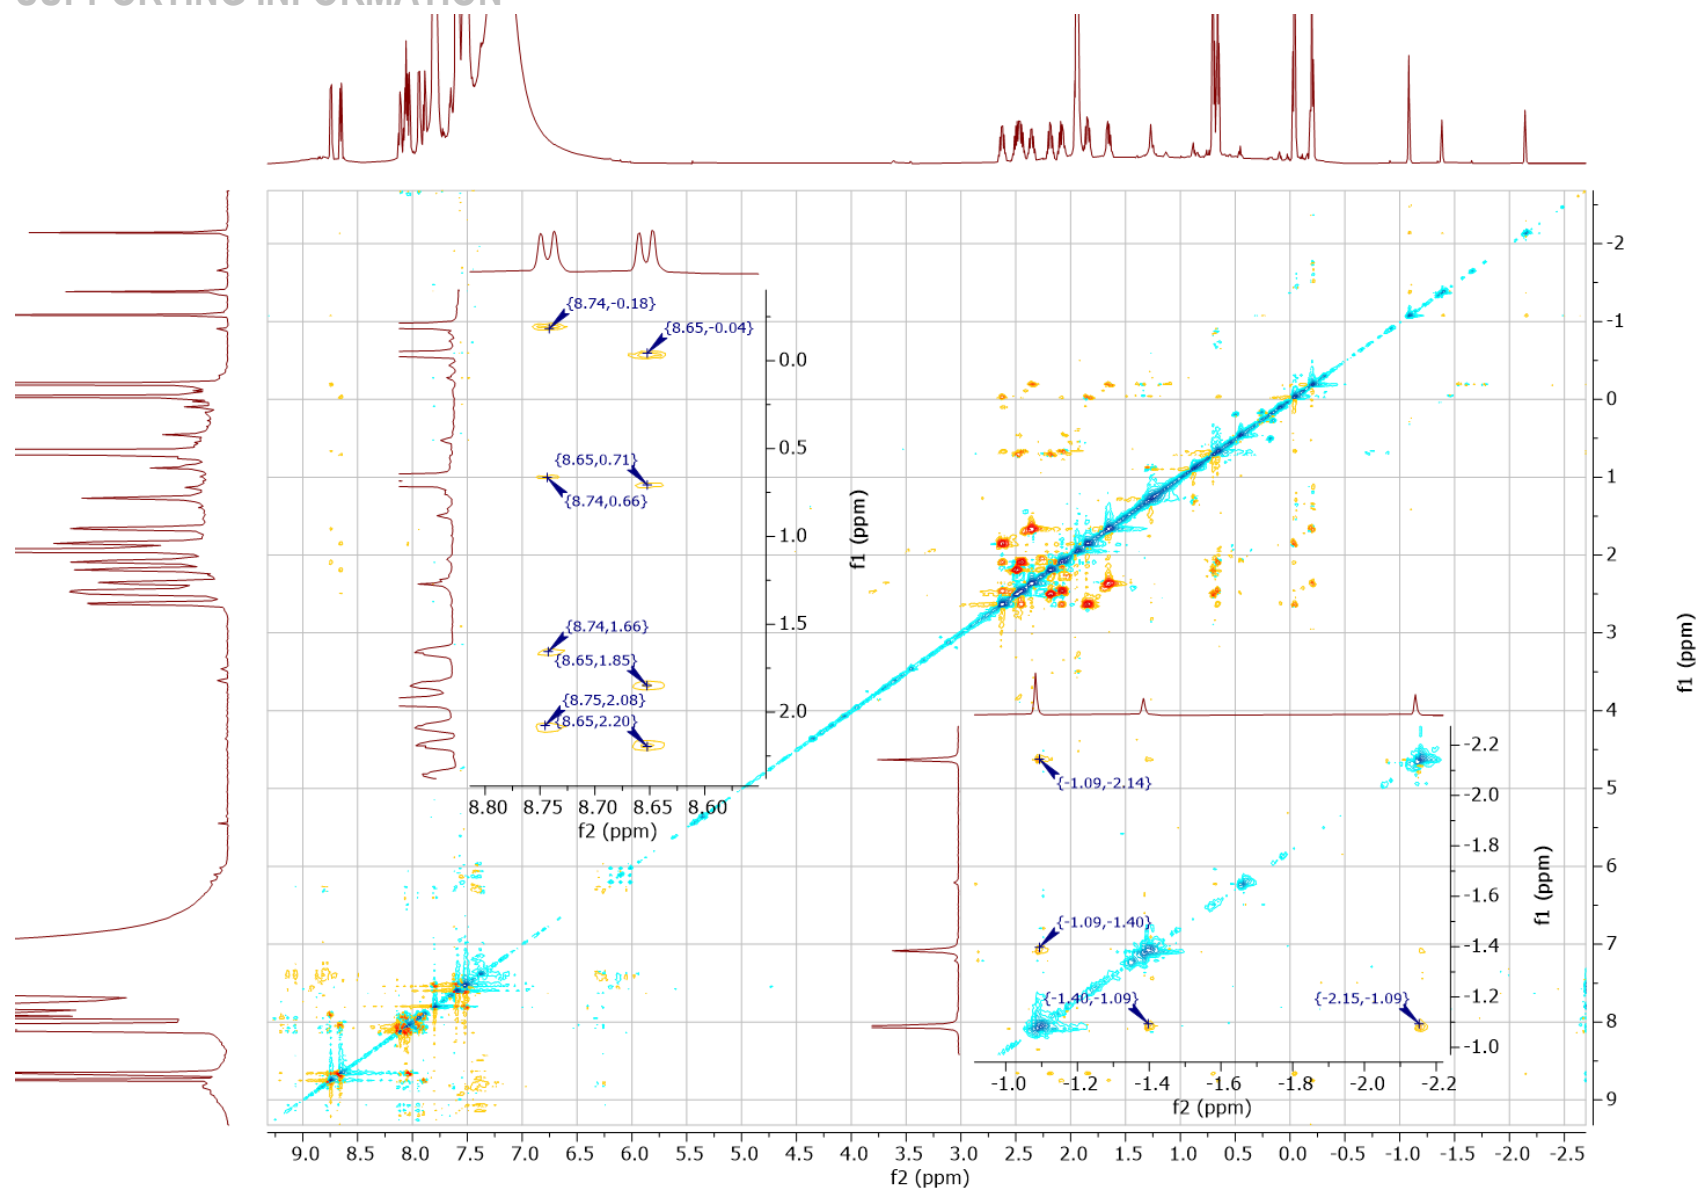

**Figure S16.**  $^1\text{H}$ - $^1\text{H}$  ROESY spectrum of  $\alpha_2\beta_2$ -P1-BSA with expansion of areas of interest (acetonitrile- $d_3$ , 25 °C).

## SUPPORTING INFORMATION

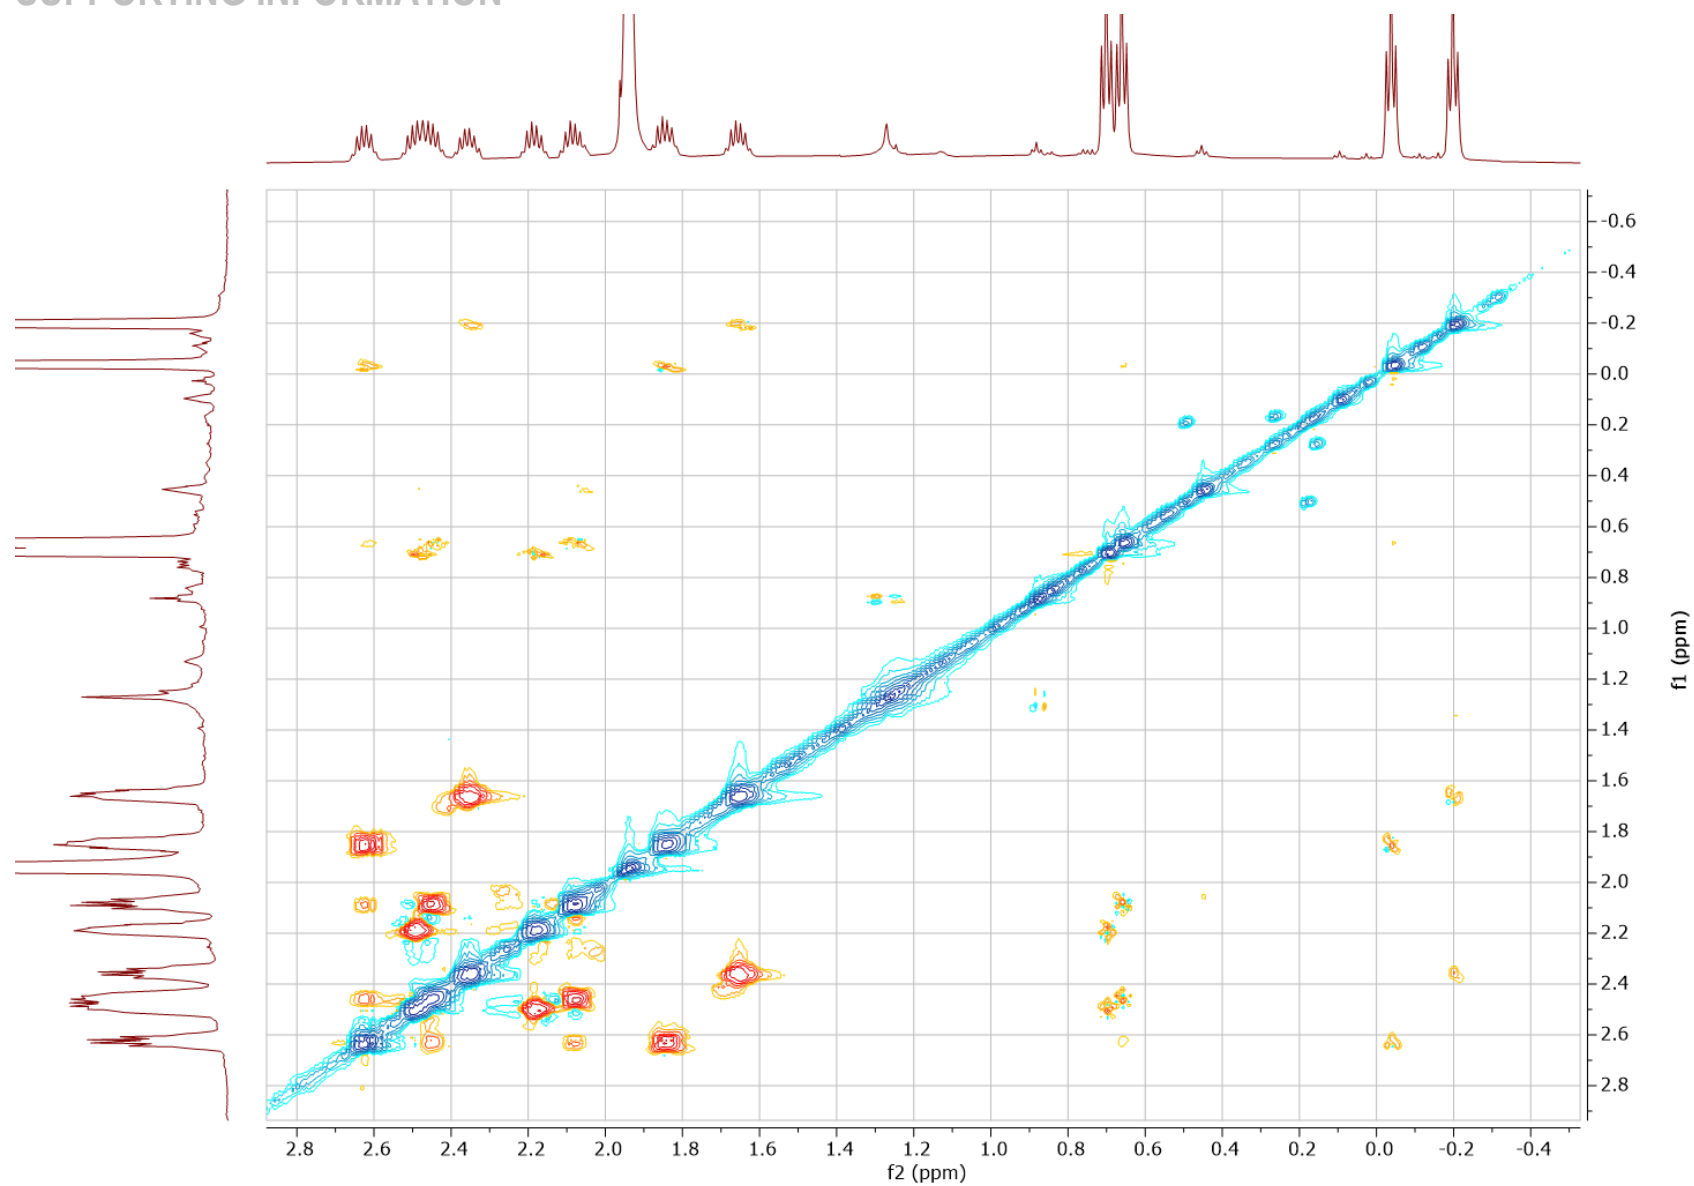

**Figure S17.**  $^1\text{H}$ - $^1\text{H}$  ROESY spectrum of  $\alpha_2\beta_2$ -P1-BSA, expansion of aliphatic area (acetonitrile- $d_3$ , 25 °C).

## SUPPORTING INFORMATION

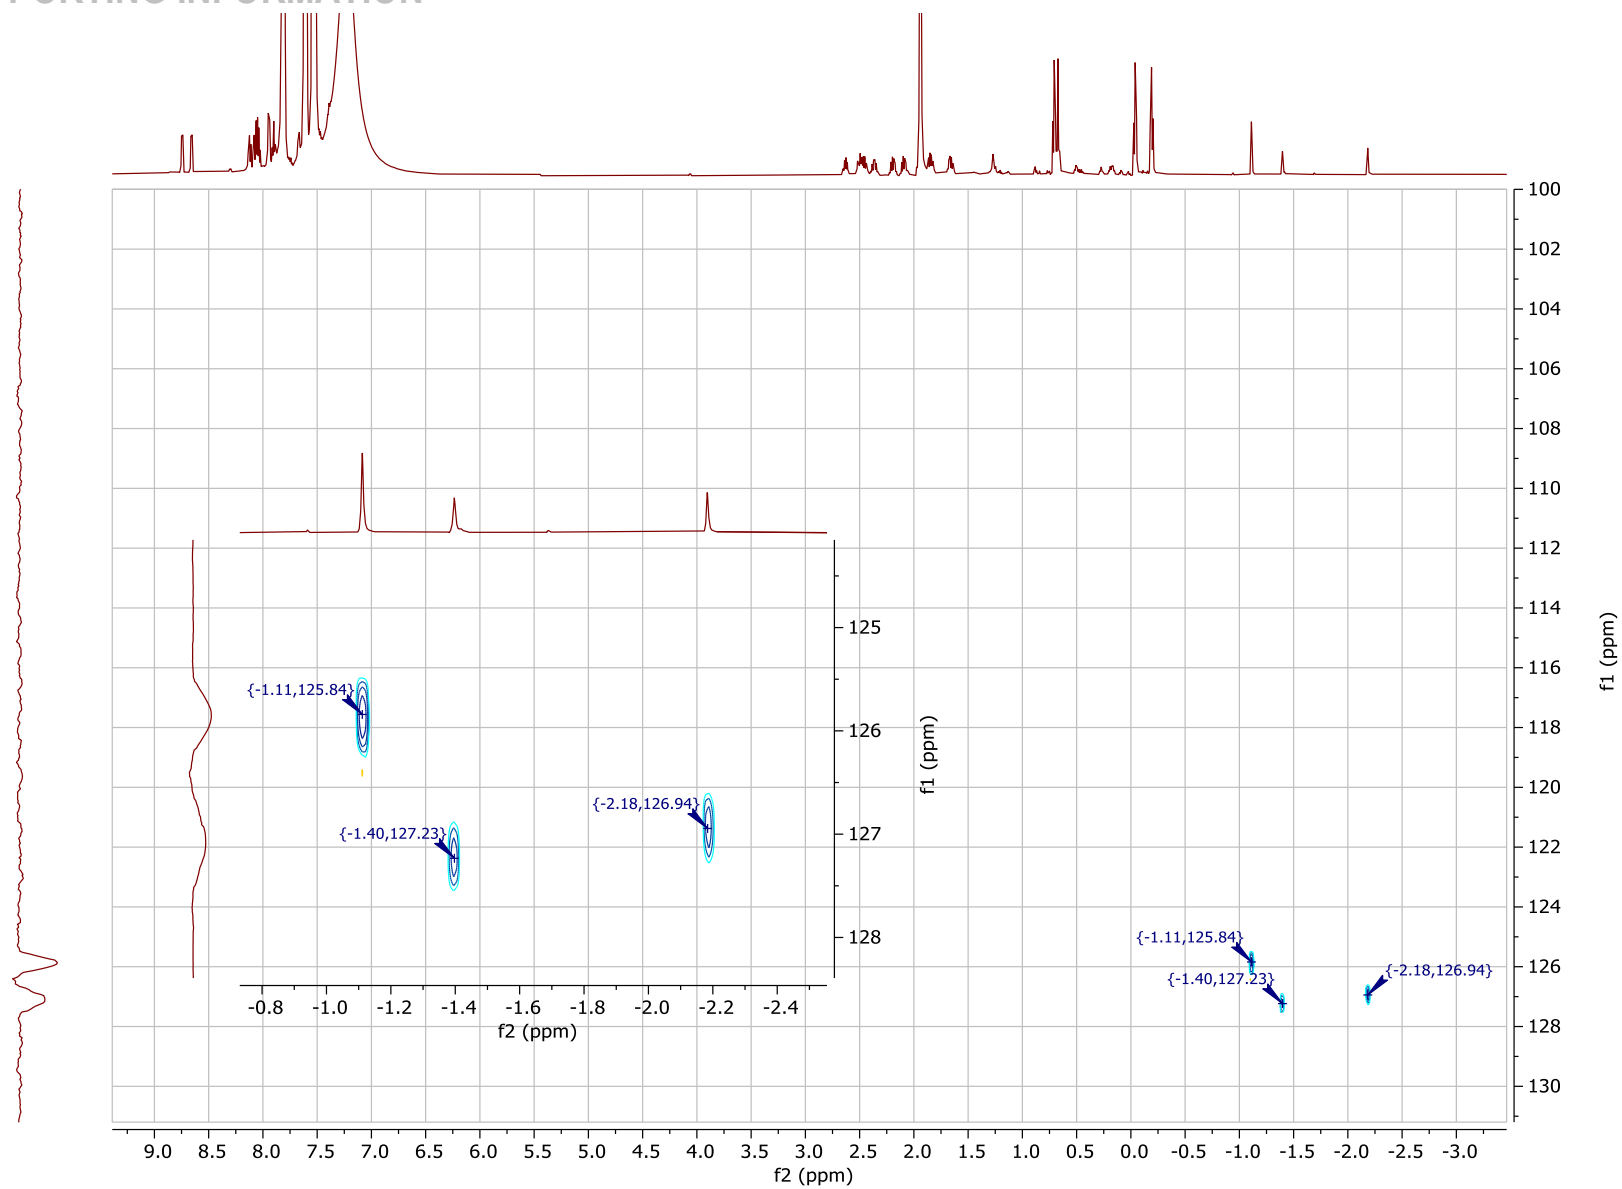

**Figure S18.**  $^1\text{H}$ - $^{15}\text{N}$  HSQC spectrum of  $\alpha_2\beta_2$ -P1-BSA with expansion of areas of interest (acetonitrile- $d_3$ , 25 °C).

## SUPPORTING INFORMATION

Synthesis and Characterization of  $\alpha_3\beta$ -P1-BSA

**$\alpha,\alpha,\alpha,\beta$ -5,10,15,20-Tetrakis(2-aminiumphenyl)-2,3,7,8,12,13,17,18-octaethyl-porphyrin hexa-benzenesulfonic acid salt ( $\alpha_3\beta$ -P1-BSA).** In a sample tube benzenesulfonic acid (0.82 mg; 0.25 mmol; 50 eq.) was dissolved in 1 mL of acetonitrile- $d_3$ . Isomerically pure [ $\alpha,\alpha,\alpha,\beta$ -5,10,15,20-tetrakis(2-aminophenyl)-2,3,7,8,12,13,17,18-octaethylporphyrinato]nickel(II) (5 mg; 0.005 mmol; 1 eq.) was added in one batch and stirred for 16 hours. The completion of demetalation followed by complex formation was identified by a clear color change (maroon to green) of the solution. During slow evaporation, green/blue shard habit crystals were formed.  $^1\text{H}$  NMR (600 MHz, acetonitrile- $d_3$ )  $\delta$  = 8.85 (d,  $J$  = 7.3 Hz, 1H, Ar- $H$  (d)), 8.83 (d,  $J$  = 7.5 Hz, 1H, Ar- $H$  (a)), 8.72 (d,  $J$  = 7.4 Hz, 1H, Ar- $H$  (c)), 8.62 (d,  $J$  = 7.5 Hz, 1H, Ar- $H$  (b)), 8.14 – 8.07 (m, 2H, Ar- $H$  (a,b,c,d)), 8.08 – 7.97 (m, 6H, Ar- $H$  (b,c)), 7.96 (d,  $J$  = 4.8 Hz, 1H, Ar- $H$  (d)), 7.94 (d,  $J$  = 4.8 Hz, 1H, Ar- $H$  (a)), 7.89 (t,  $J$  = 7.5 Hz, 1H, Ar- $H$  (d)), 7.85 (t,  $J$  = 7.5 Hz, 1H, Ar- $H$  (a)), 2.61 (dq,  $J$  = 14.8, 7.4 Hz, 2H,  $\text{CH}_2$  (a,f)), 2.52 (dq,  $J$  = 15.3, 7.6 Hz, 1H,  $\text{CH}_2$  (g)), 2.44 (ddq,  $J$  = 21.3, 14.2, 7.4 Hz, 4H,  $\text{CH}_2$  (a,b,h,e)), 2.21 (ddq,  $J$  = 30.1, 15.1, 7.6 Hz, 2H,  $\text{CH}_2$  (g,d)), 2.10 – 1.99 (m, 3H,  $\text{CH}_2$  (d,e,h)), 1.85 (dq,  $J$  = 15.1, 7.5 Hz, 2H,  $\text{CH}_2$  (f,c)), 1.70 (dq,  $J$  = 15.8, 8.0 Hz, 2H,  $\text{CH}_2$  (a,b)), 0.74 (t,  $J$  = 7.5 Hz, 3H,  $\text{CH}_3$  (d)), 0.71 (t,  $J$  = 7.5 Hz, 3H,  $\text{CH}_3$  (g)), 0.45 (t,  $J$  = 7.5 Hz, 3H,  $\text{CH}_3$  (h)), 0.42 (t,  $J$  = 7.5 Hz, 3H,  $\text{CH}_3$  (e)), 0.10 (t,  $J$  = 7.4 Hz, 3H,  $\text{CH}_3$  (f)), 0.02 (t,  $J$  = 7.4 Hz, 3H,  $\text{CH}_3$  (c)), -0.11 (t,  $J$  = 7.5 Hz, 3H,  $\text{CH}_3$  (a)), -0.16 (t,  $J$  = 7.5 Hz, 3H,  $\text{CH}_3$  (b)), -0.89 (s, 1H, N- $H$  (d)), -1.25 (s, 1H, N- $H$  (c)), -1.37 (s, 1H, N- $H$  (a)), -1.61 (s, 1H, N- $H$  (b)) ppm.;  $^{13}\text{C}$  NMR (151 MHz, acetonitrile- $d_3$ )  $\delta$  = 145.59 ( $\alpha$ -pyrrole (h)), 145.29 ( $\beta$ -pyrrole (d)), 145.04 ( $\alpha$ -pyrrole (d)), 144.88 ( $\alpha$ -pyrrole (g)), 144.71 ( $\beta$ -pyrrole (g)), 144.26 ( $\alpha$ -pyrrole (e)), 143.95 ( $\alpha$ -pyrrole (c)), 143.76 ( $\beta$ -pyrrole (h)), 143.69 ( $\alpha$ -pyrrole (f)), 143.4 ( $\beta$ -pyrrole (e)), 143.4 ( $\alpha$ -pyrrole (a)), 143.27 ( $\beta$ -pyrrole (a)), 143.26 ( $\beta$ -pyrrole (c)), 142.9 ( $\beta$ -pyrrole (f)), 142.65 ( $\alpha$ -pyrrole (b)), 141.95 ( $\beta$ -pyrrole (b)), 140.84 (Ar (a)), 140.43 (Ar (b)), 140.21 (Ar (c)), 139.35 (Ar (d)), 134.21 (Ar (b)), 134.14 (Ar (c)), 134.14 (Ar (a)), 134.05 (Ar (d)), 133.47 (Ar (d)), 133.11 (Ar (c)), 133.07 (Ar (b)), 133.04 (Ar (a)), 132.22 (Ar (d)), 132.22 (Ar (b)), 131.89 (Ar (a)), 131.86 (Ar (c)), 130.7 (Ar (c)), 130.61 (Ar (a)), 130.51 (Ar (b)), 130.43 (Ar (d)), 126.13 (Ar (c)), 126.05 (Ar (d)), 126.05 (Ar (b)), 125.81 (Ar (a)), 114.9 (meso- (a)), 113.39 (meso- (d)), 113.36 (meso- (b)), 111.53 (meso- (c)), 20.69 ( $\text{CH}_2$  (d)), 20.58 ( $\text{CH}_2$  (g)), 20.23 ( $\text{CH}_2$  (h)), 20.23 ( $\text{CH}_2$  (e)), 19.53 ( $\text{CH}_2$  (f)), 19.53 ( $\text{CH}_2$  (c)), 19.34 ( $\text{CH}_2$  (a)), 8.99 ( $\text{CH}_2$  (b)), 15.96 ( $\text{CH}_3$  (b)), 15.84 ( $\text{CH}_3$  (f)), 15.72 ( $\text{CH}_3$  (a)), 15.67 ( $\text{CH}_3$  (h)), 15.57 ( $\text{CH}_3$  (d)), 15.29 ( $\text{CH}_3$  (g)), 15.28 ( $\text{CH}_3$  (c)), 15.26 ( $\text{CH}_3$  (e)) ppm.;  $^{15}\text{N}$  NMR (61 MHz, acetonitrile- $d_3$ )  $\delta$  = 127.27 (N- $H$  (d)), 127.04 (N- $H$  (c)), 125.90 (N- $H$  (a)), 126.88 (N- $H$  (b)).

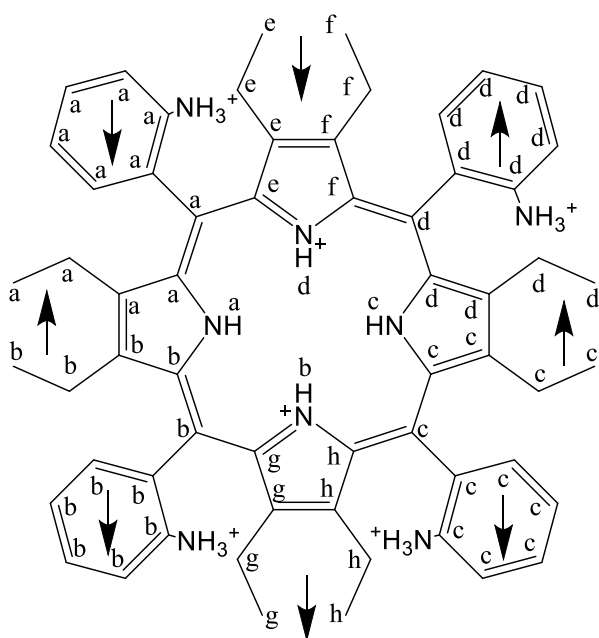

**Figure S19.** Structure of  $\alpha_3\beta$ -P1-BSA highlighting the positions used in NMR characterizations.

## SUPPORTING INFORMATION

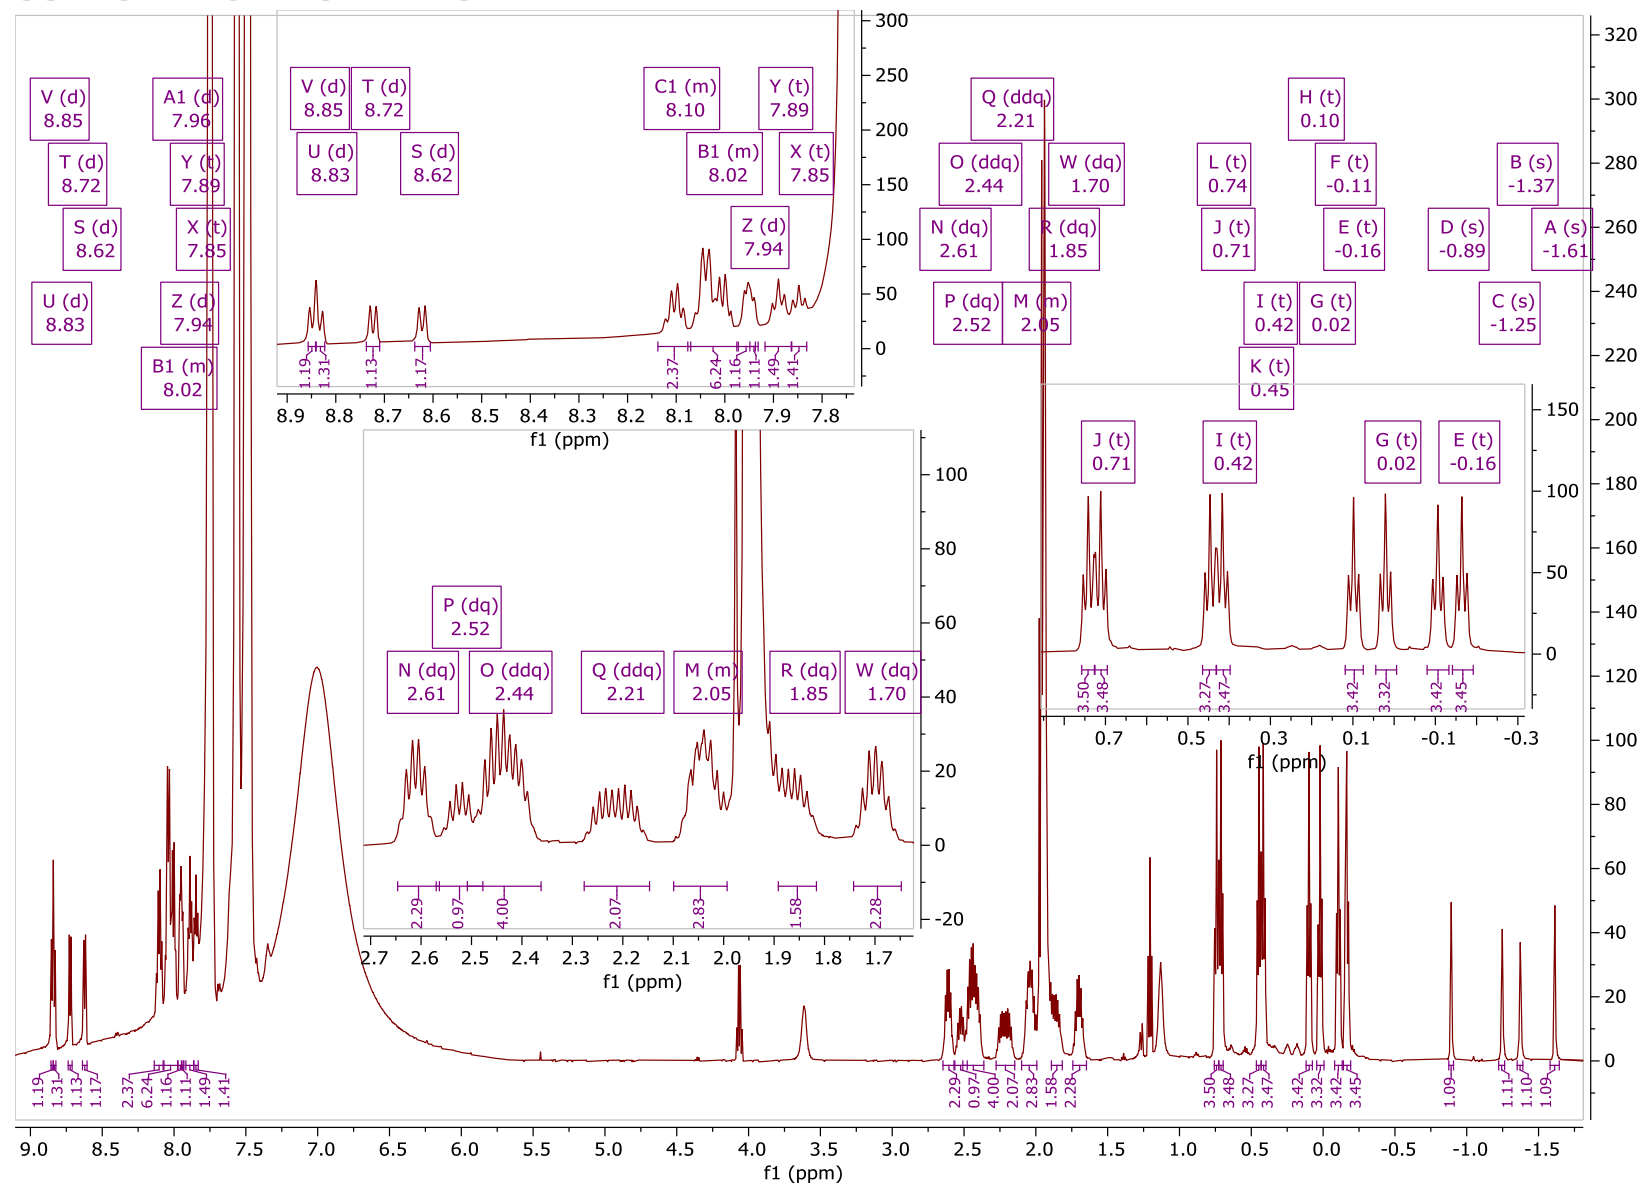

**Figure S20.**  $^1\text{H}$  NMR spectrum of  $\alpha_3\beta\text{-P1-BSA}$  with expansion of areas of interest (600 MHz, acetonitrile- $d_3$ ,  $25^\circ\text{C}$ ).

## SUPPORTING INFORMATION

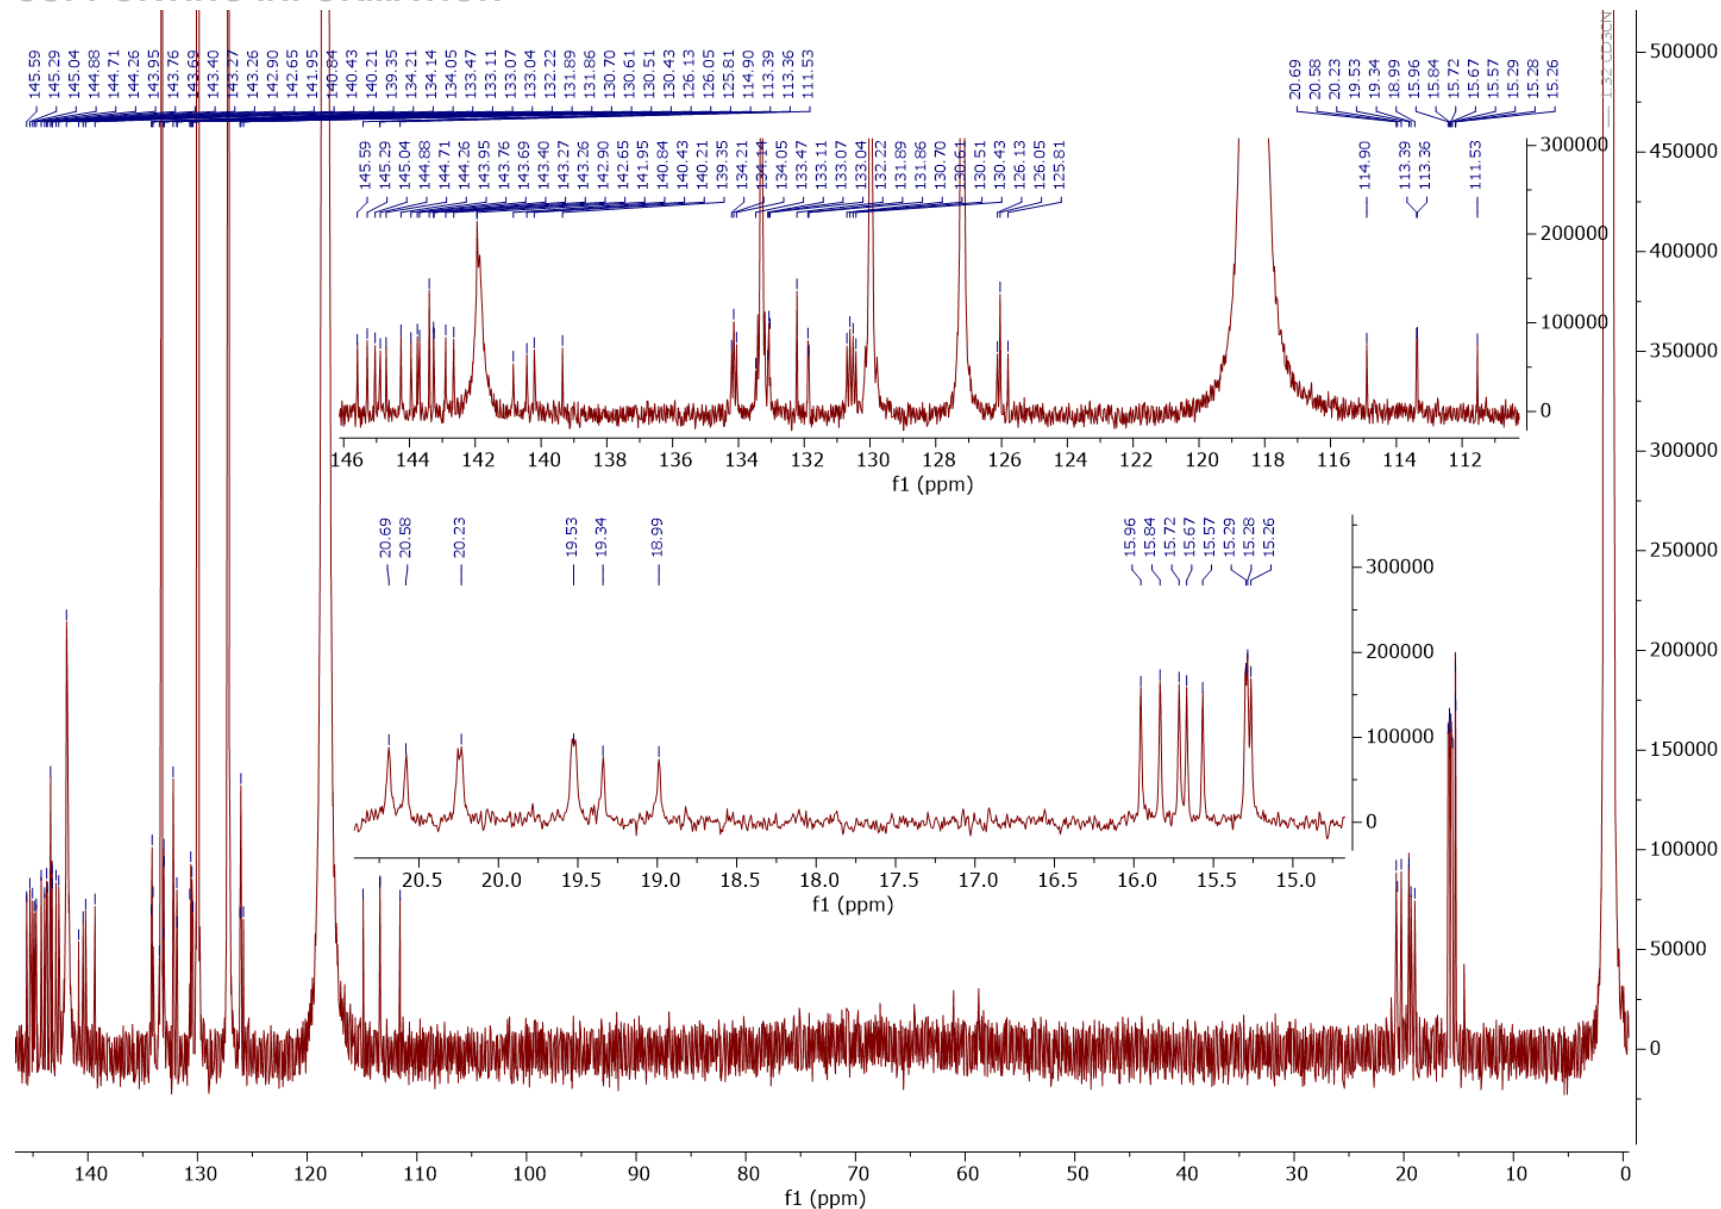

**Figure S21.**  $^{13}\text{C}$  NMR spectrum of  $\alpha_3\beta\text{-P1-BSA}$  with expansion of areas of interest (151 MHz, acetonitrile- $d_3$ , 25 °C).



## SUPPORTING INFORMATION

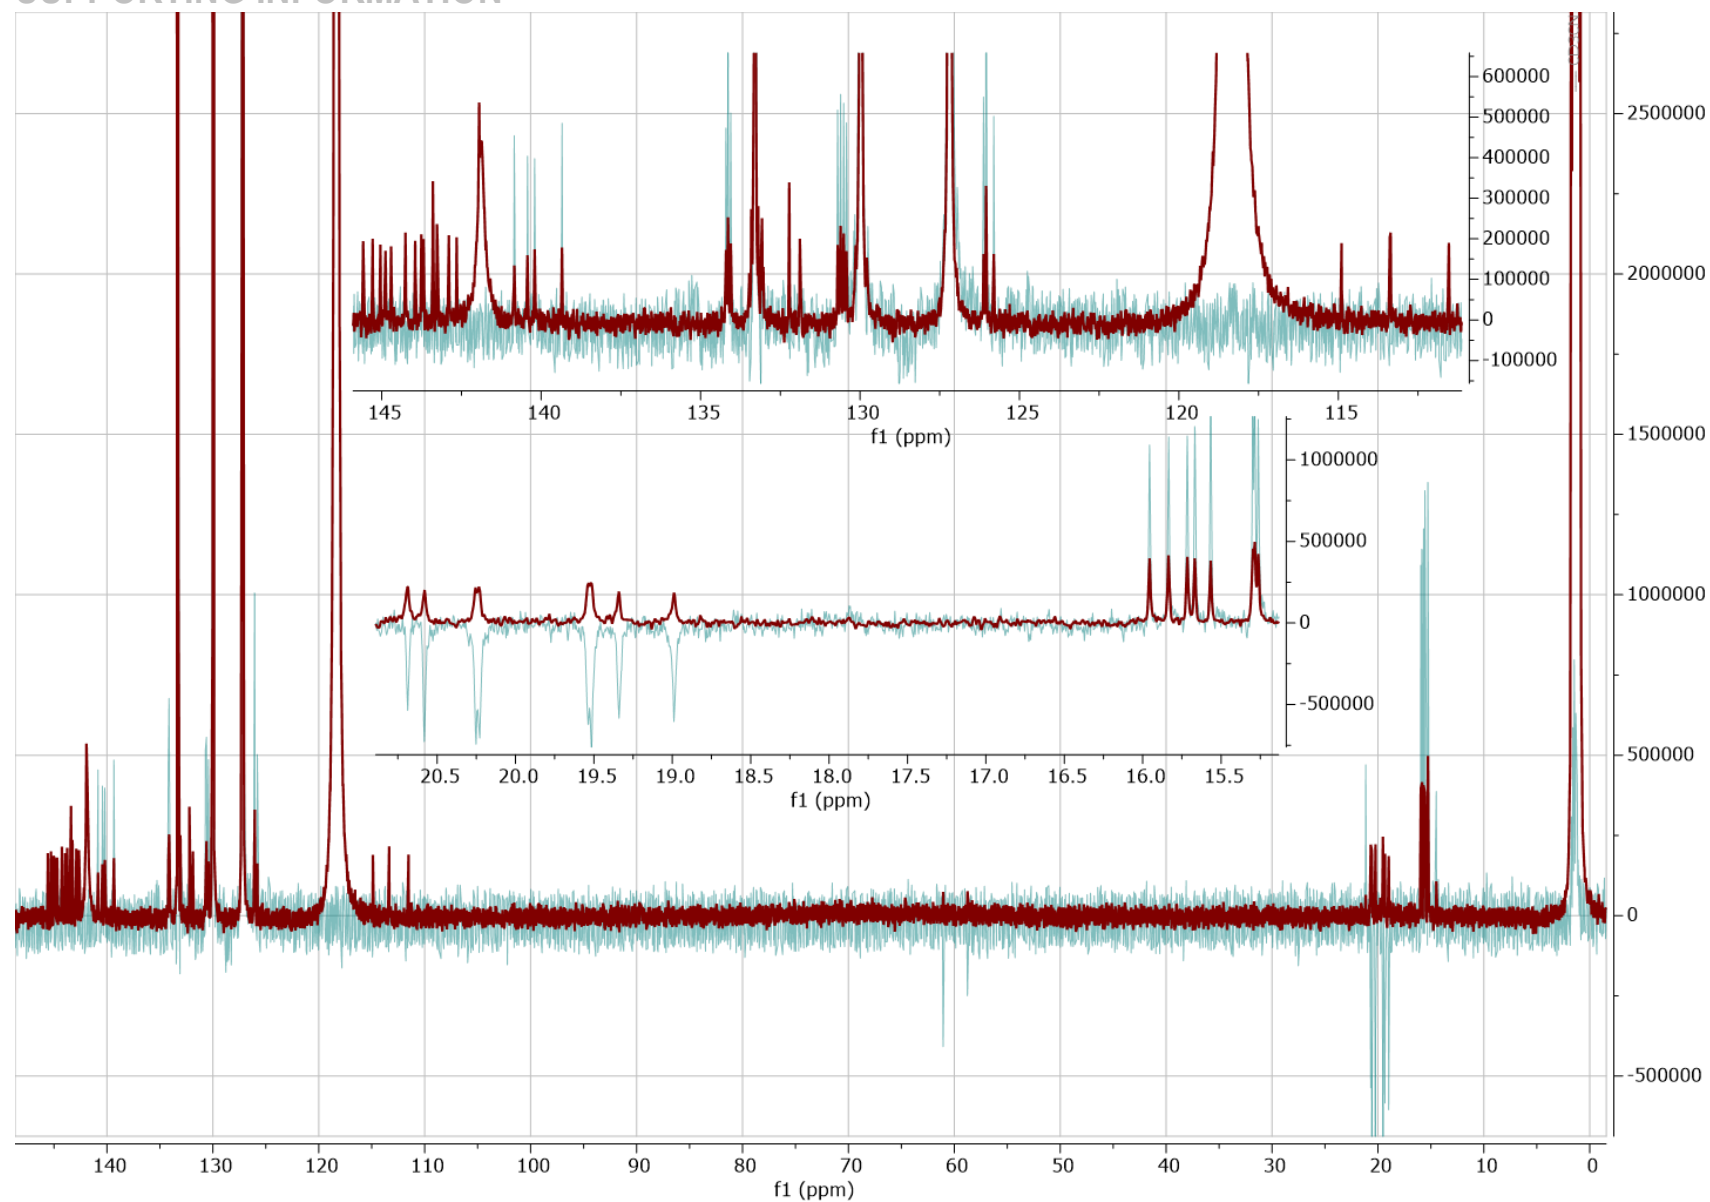

**Figure S22.**  $^{13}\text{C}$  NMR and DEPT-135 overlay spectra of  $\alpha_3\beta$ -P1-BSA with expansion of areas of interest (151 MHz, acetonitrile-*d*<sub>3</sub>, 25 °C).

## SUPPORTING INFORMATION

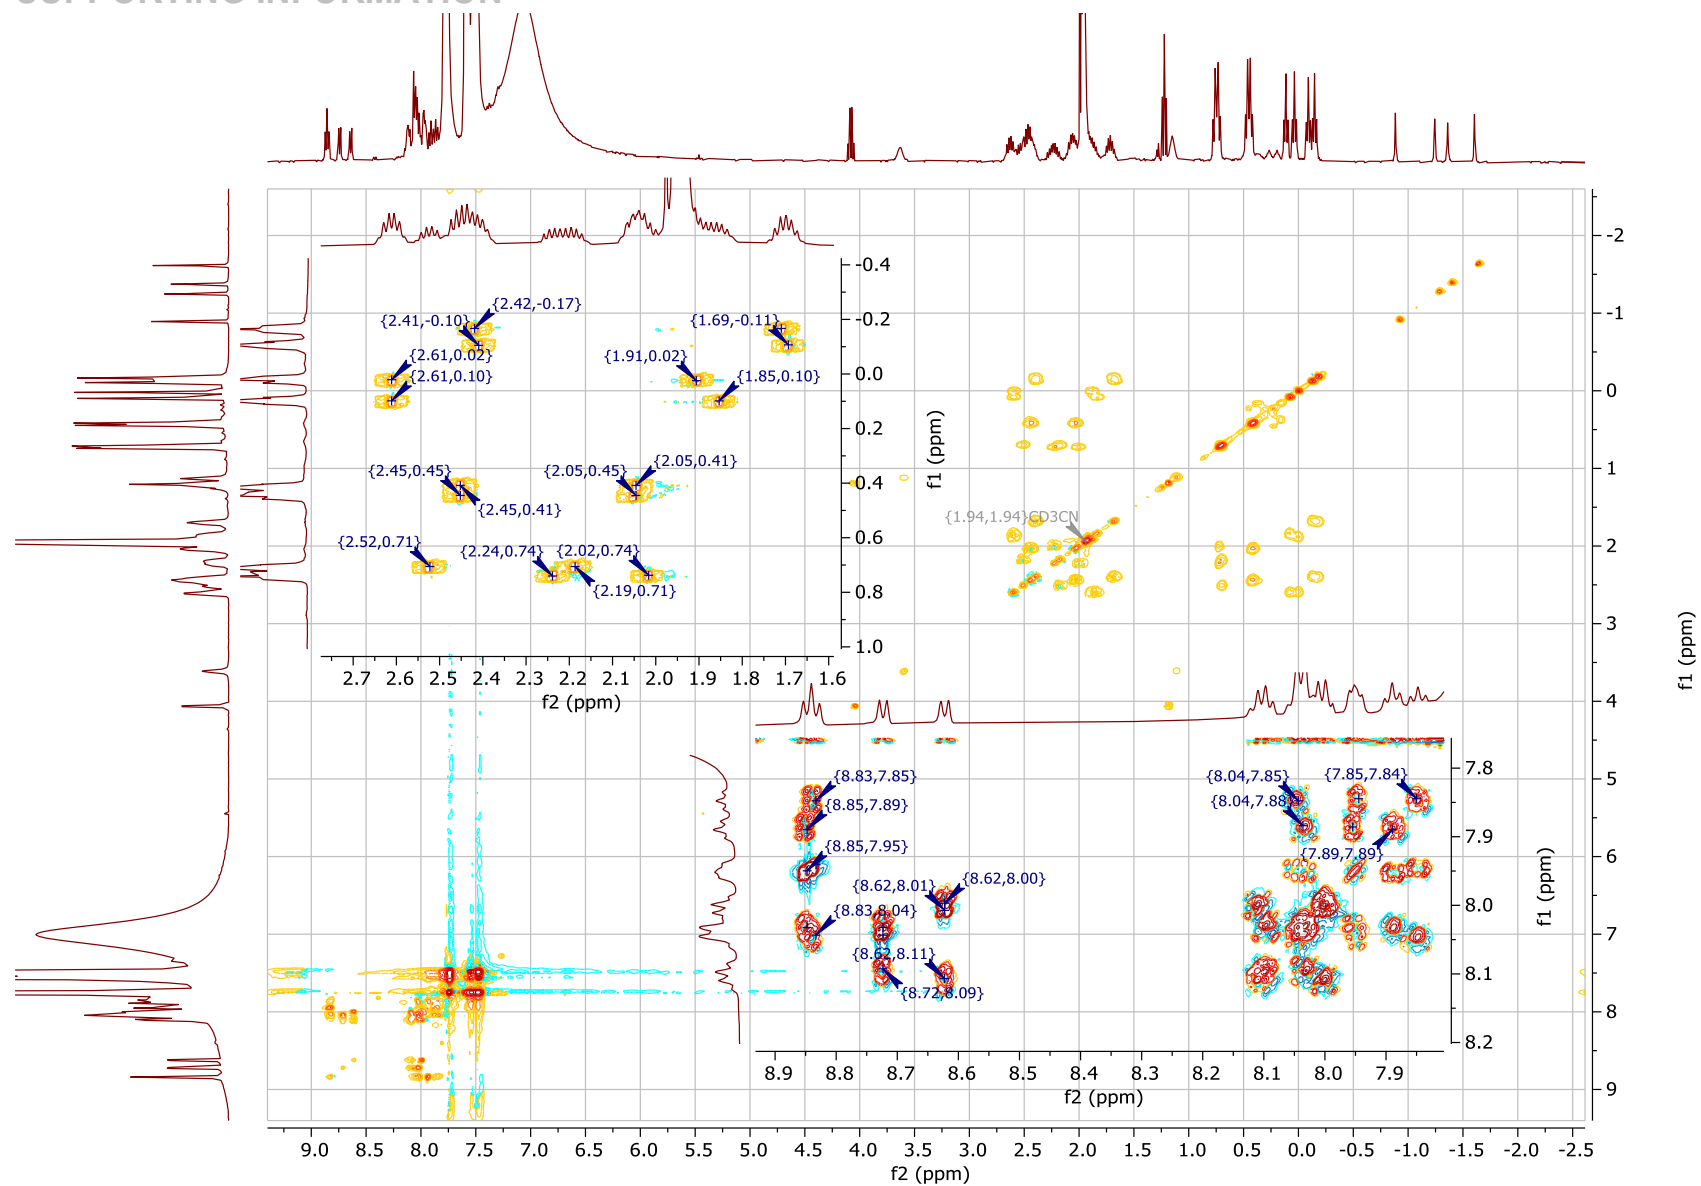

**Figure S23.**  $^1\text{H}$ - $^1\text{H}$  TOCSY spectrum of  $\alpha_3\beta$ -P1-BSA with expansion of areas of interest (acetonitrile- $d_3$ ,  $25\text{ }^\circ\text{C}$ ).

## SUPPORTING INFORMATION

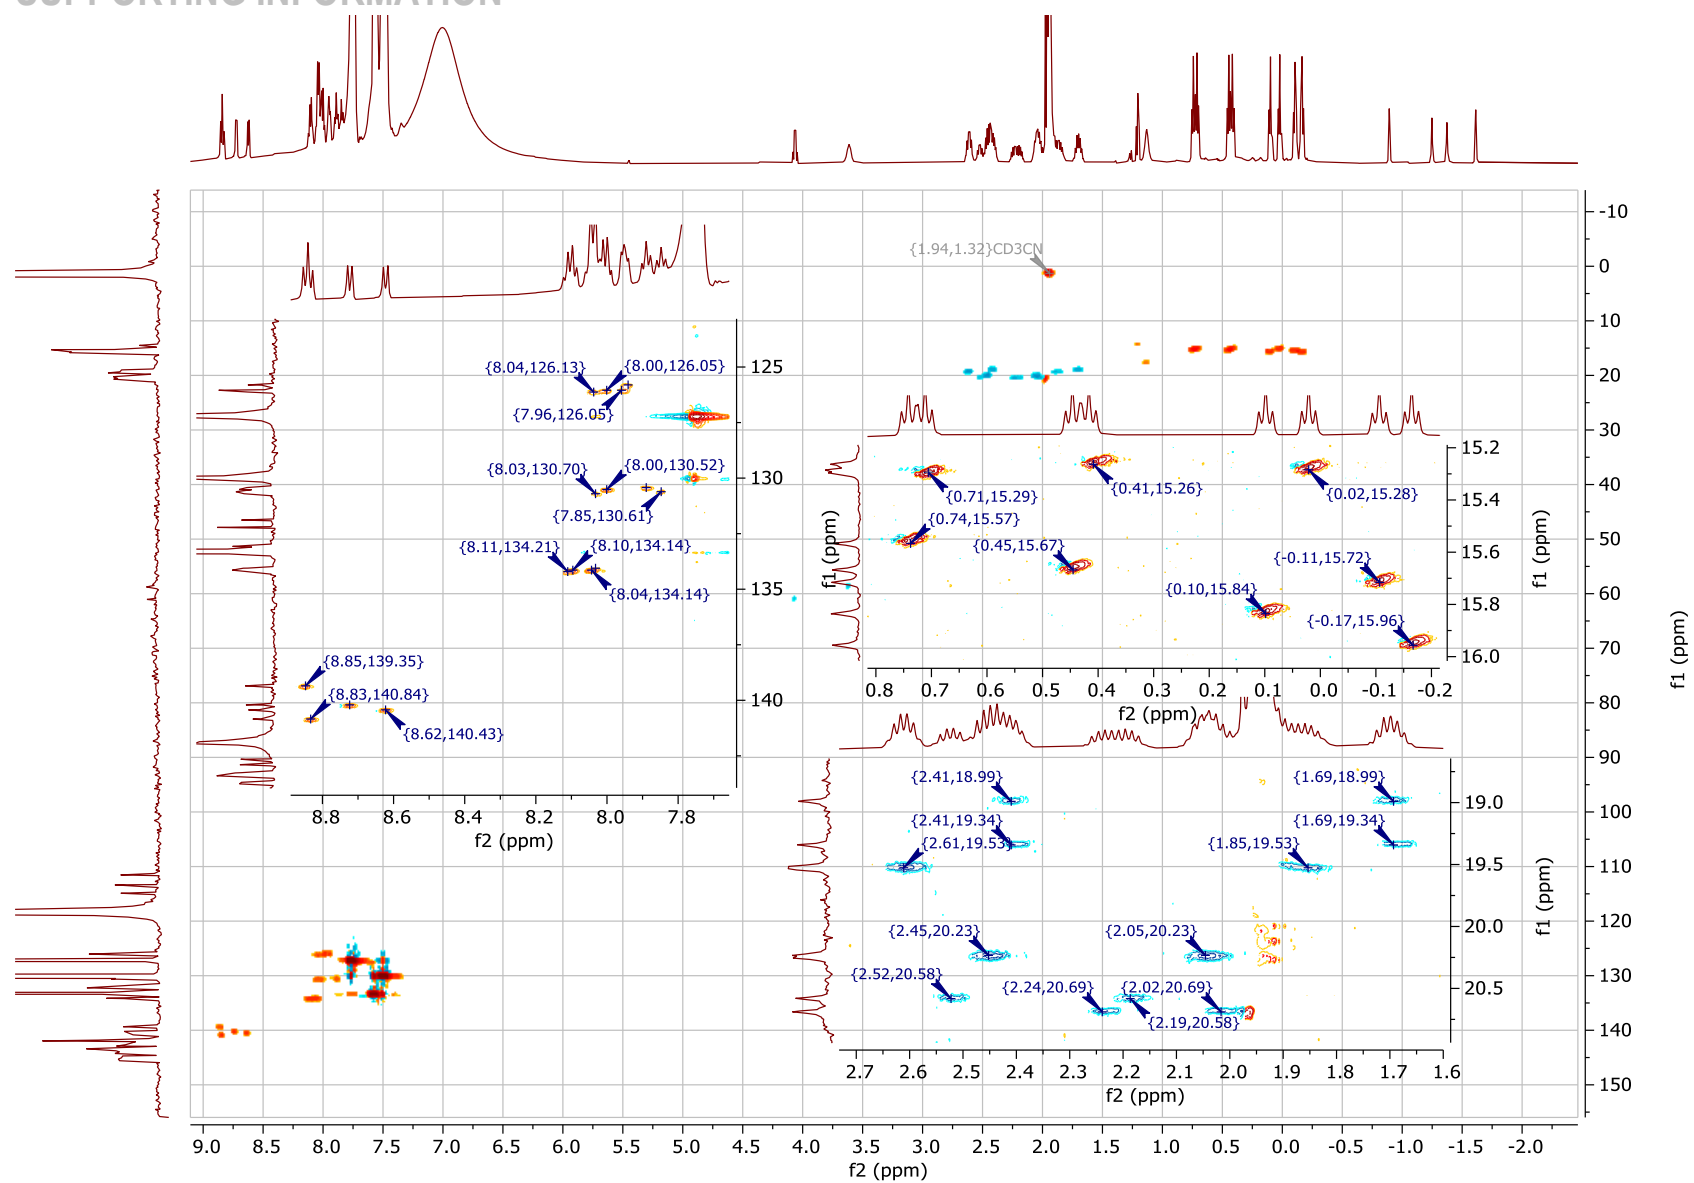

Figure S24.  $^1\text{H}$ - $^{13}\text{C}$  HSQC spectrum of  $\alpha_3,\beta$ -P1-BSA with expansion of areas of interest (acetonitrile- $d_3$ , 25 °C).

## SUPPORTING INFORMATION

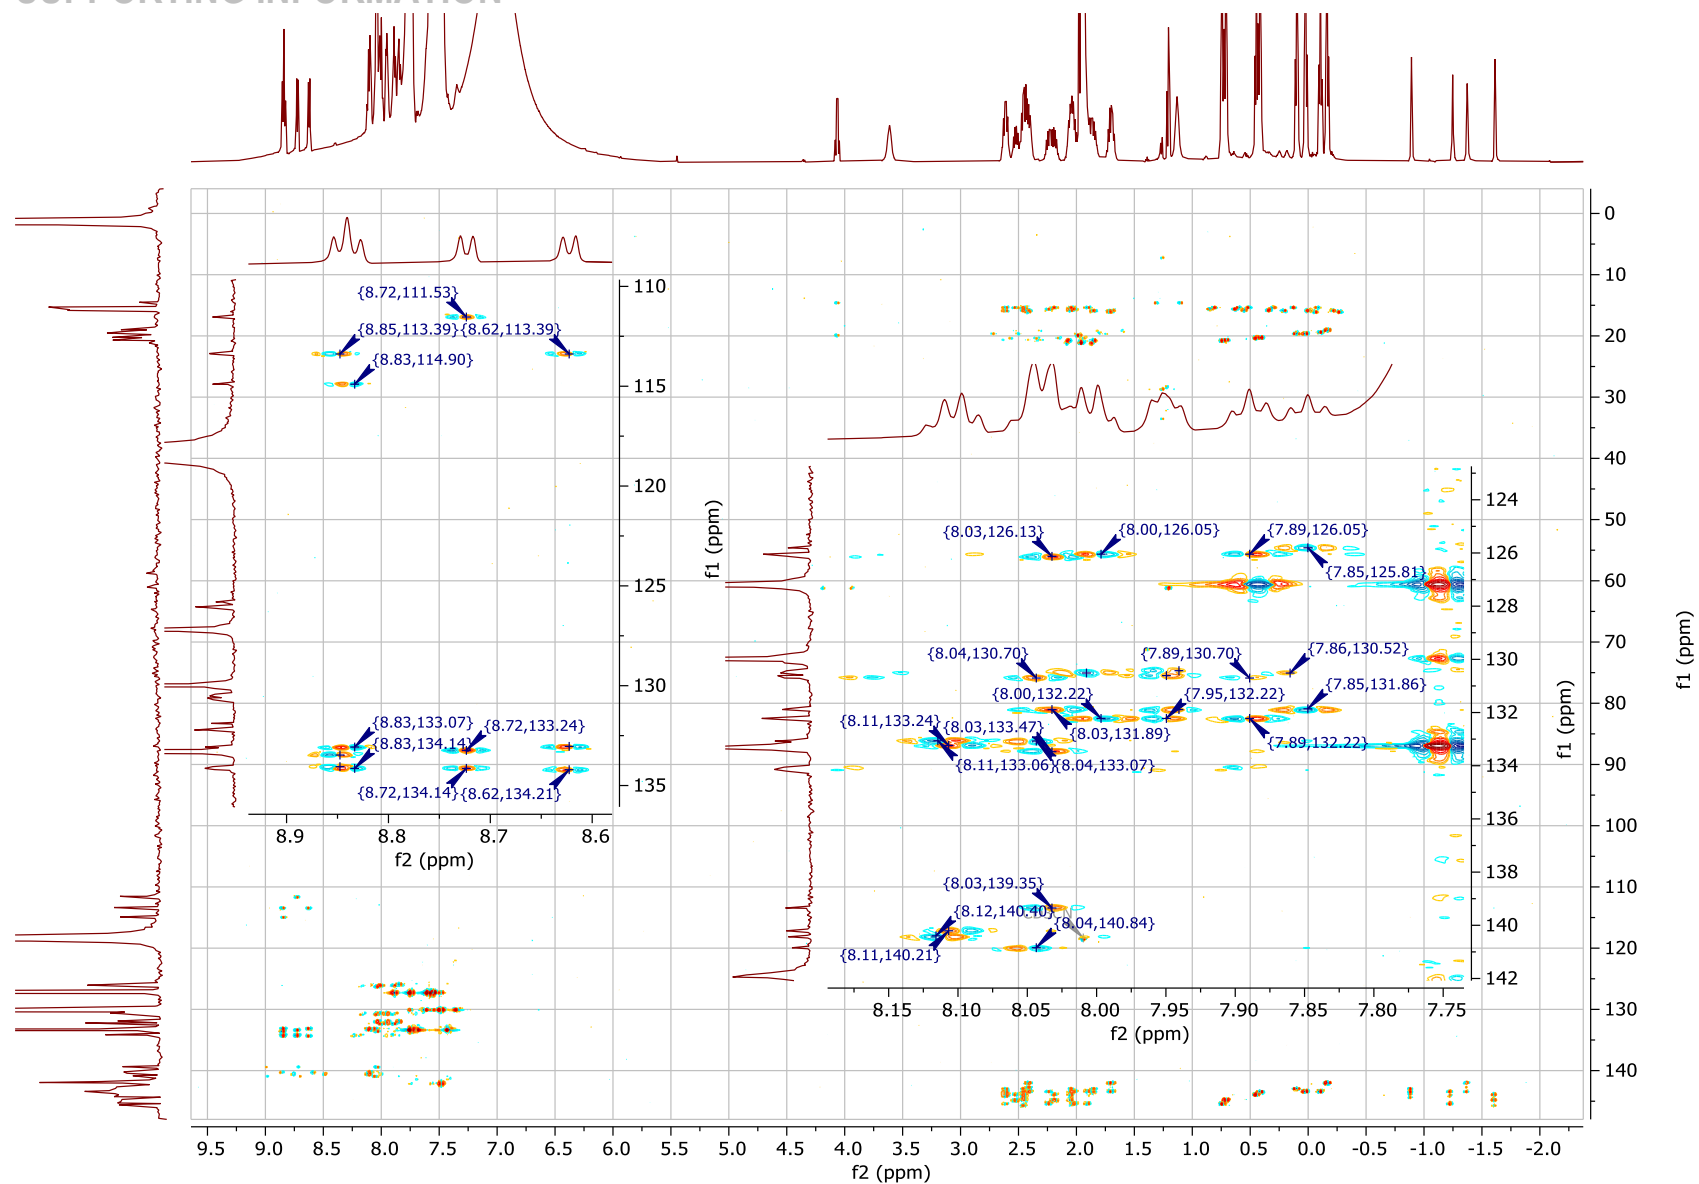

Figure S25.  $^1\text{H}$ - $^{13}\text{C}$  HMBC spectrum of  $\alpha_3\beta$ -P1-BSA with expansion of areas of interest (acetonitrile- $d_3$ , 25 °C).

## SUPPORTING INFORMATION

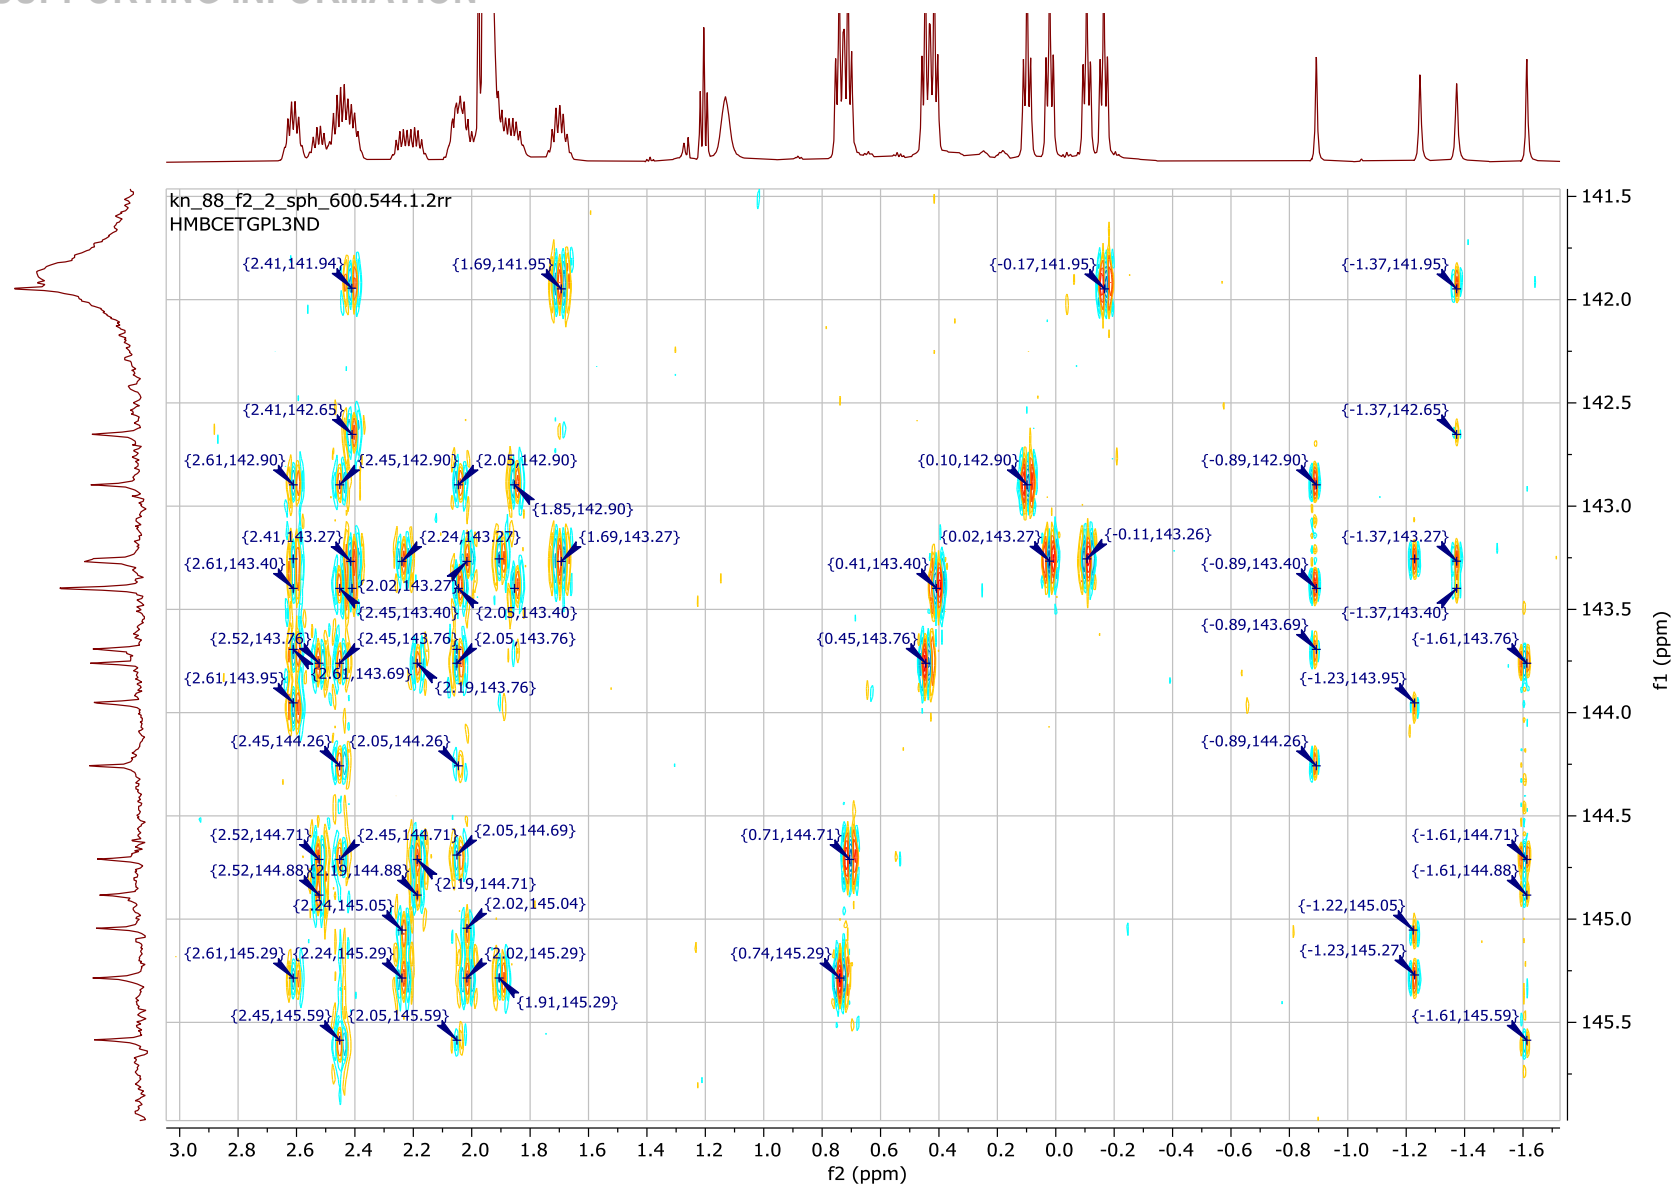

Figure S26.  $^1\text{H}$ - $^{13}\text{C}$  HMBC spectrum, expansion of area of interest of  $\alpha_3\beta$ -P1-BSA (acetonitrile- $d_3$ , 25 °C).

## SUPPORTING INFORMATION

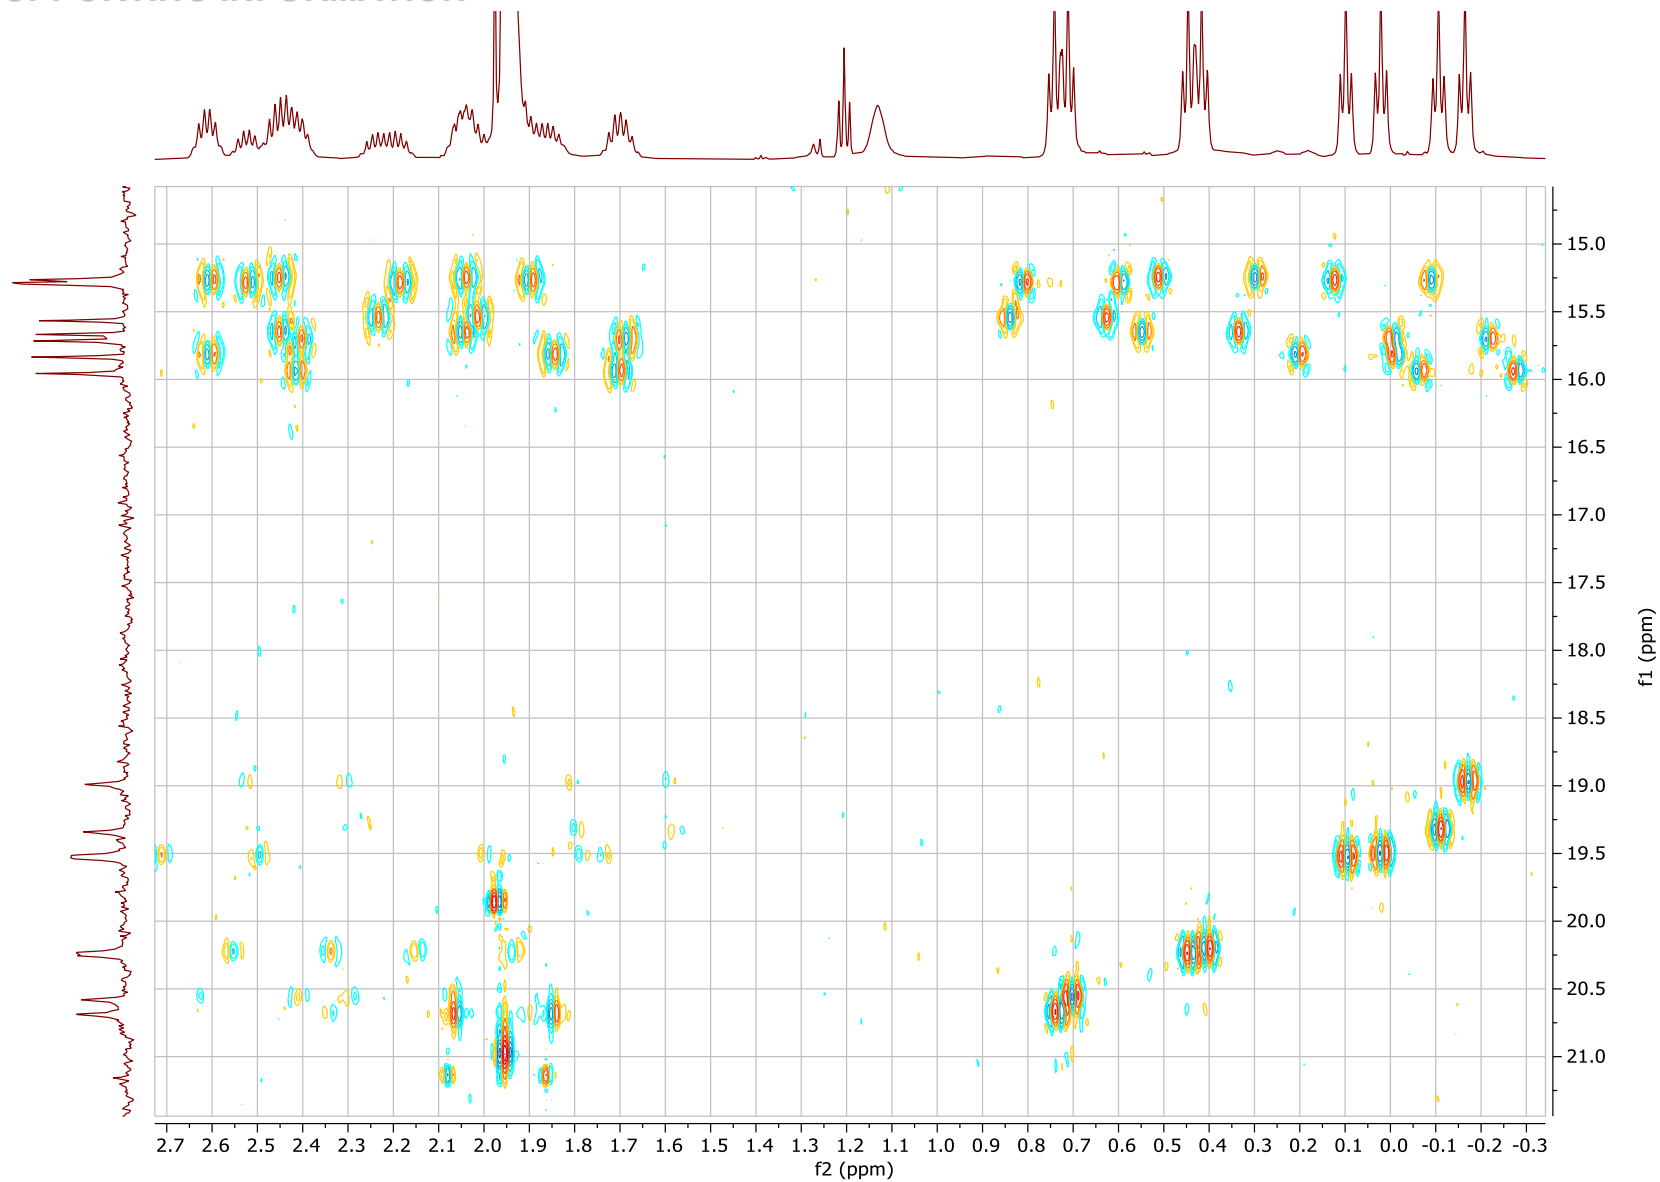

**Figure S27.**  $^1\text{H}$ - $^{13}\text{C}$  HMBC spectrum of  $\alpha_3\beta$ -P1-BSA, expansion of aliphatic area (acetonitrile- $d_3$ , 25  $^\circ\text{C}$ ).

## SUPPORTING INFORMATION

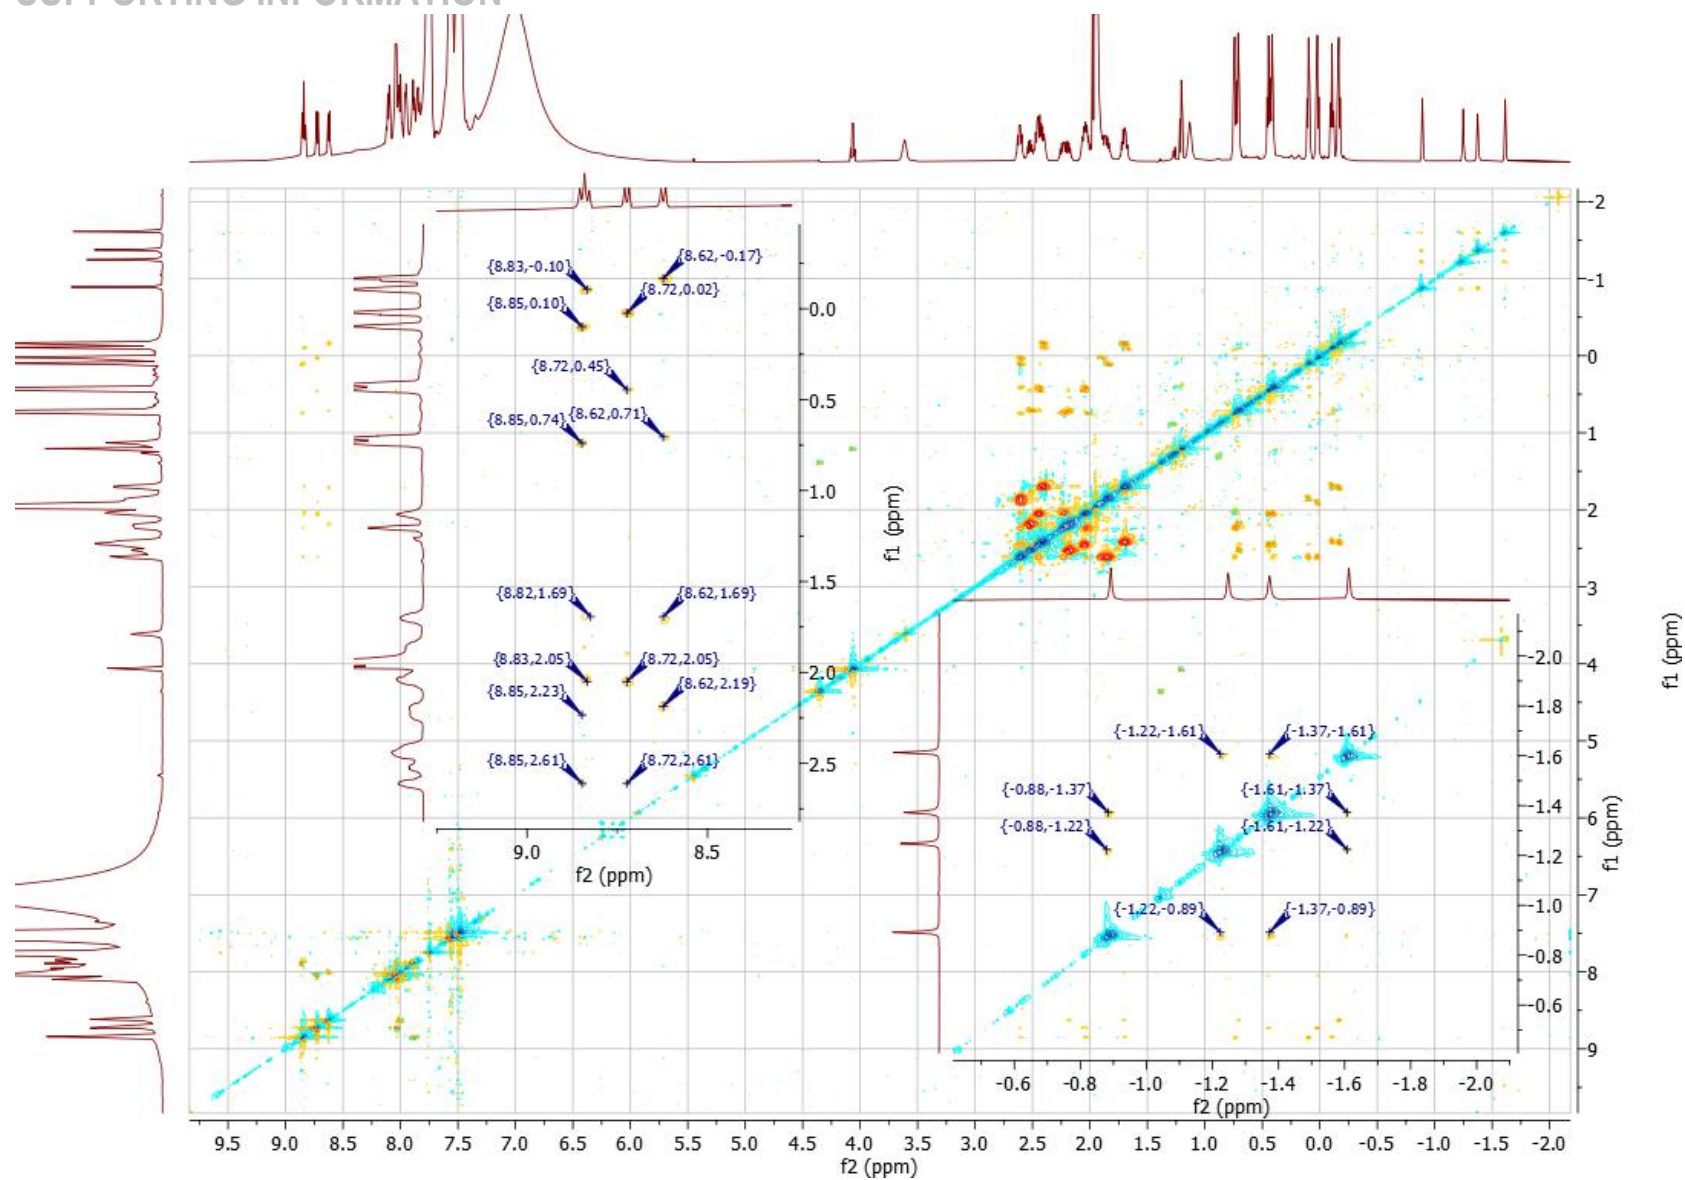

Figure S28. <sup>1</sup>H-<sup>1</sup>H ROESY spectrum of  $\alpha_3\beta$ -P1-BSA with expansion of areas of interest (acetonitrile-*d*<sub>3</sub>, 25 °C).

## SUPPORTING INFORMATION

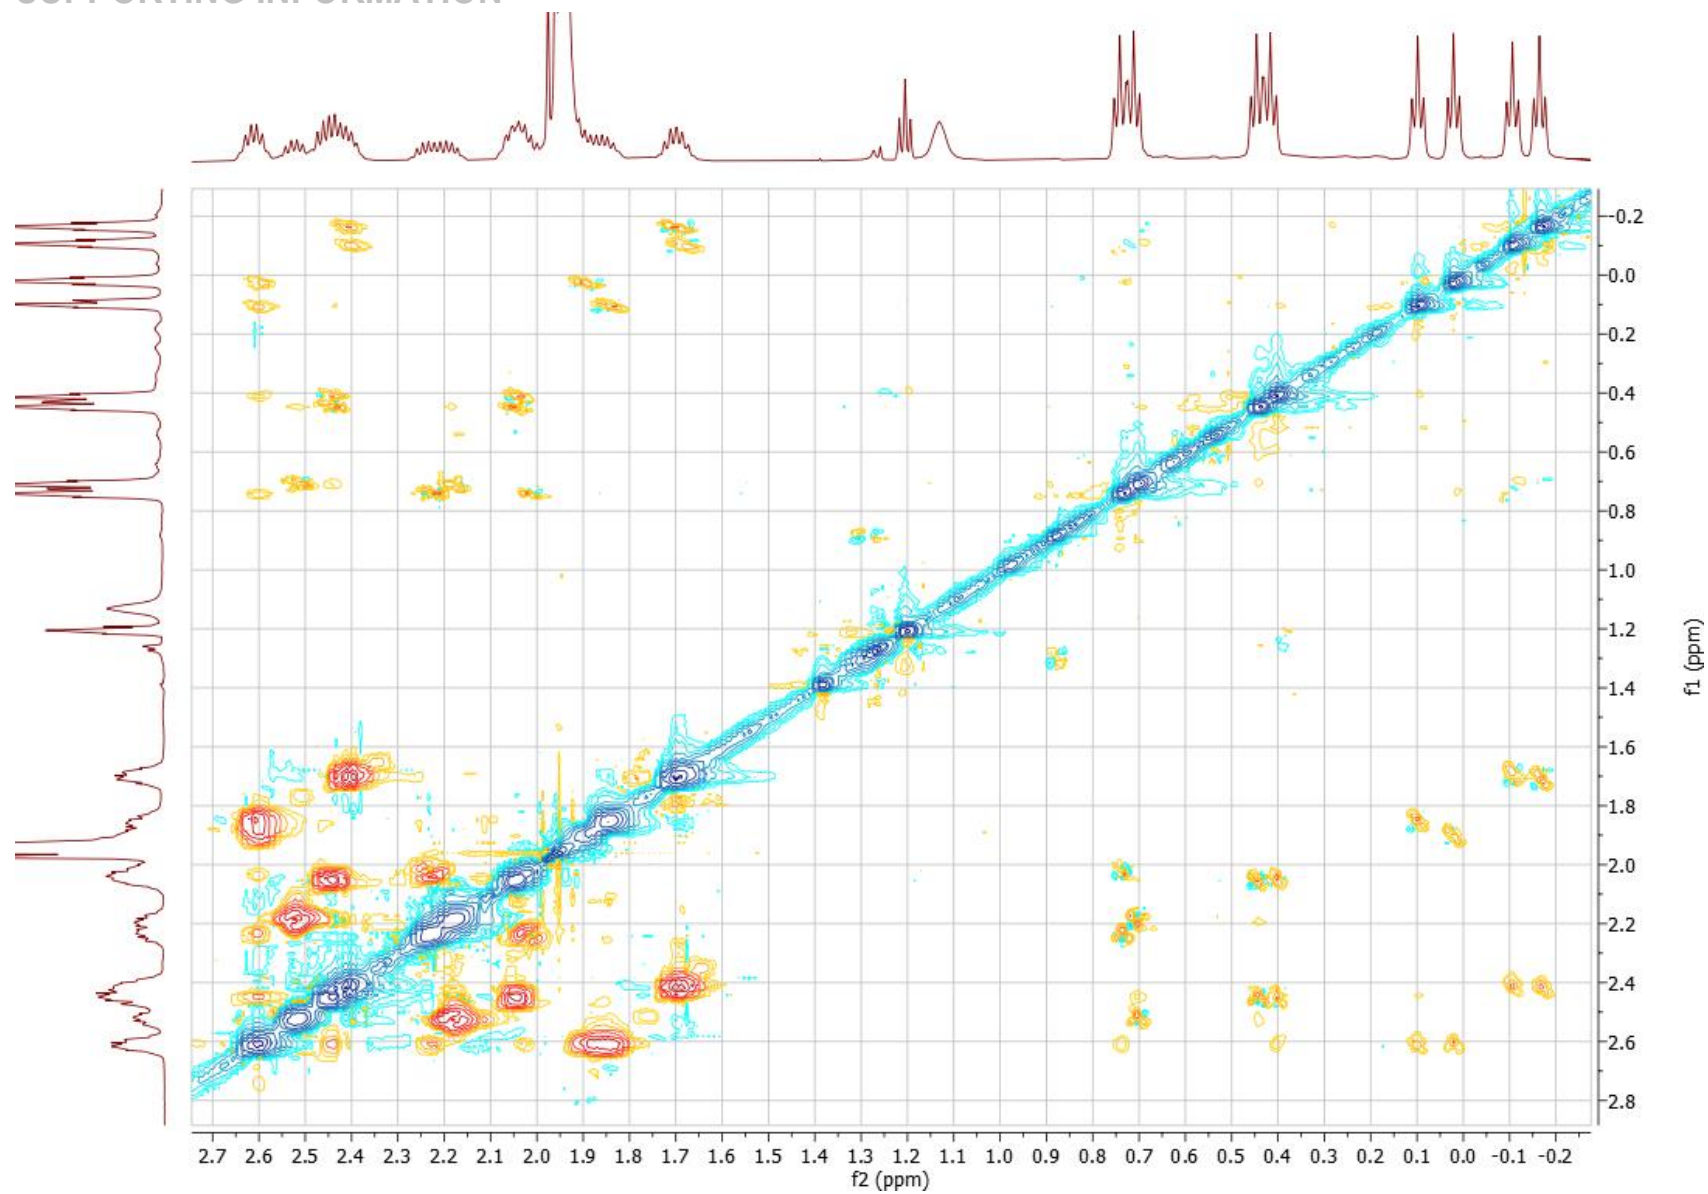

**Figure S29.**  $^1\text{H}$ - $^1\text{H}$  ROESY spectrum of  $\alpha_3\beta$ -P1-BSA, expansion of aliphatic area (acetonitrile- $d_3$ , 25 °C).



## SUPPORTING INFORMATION

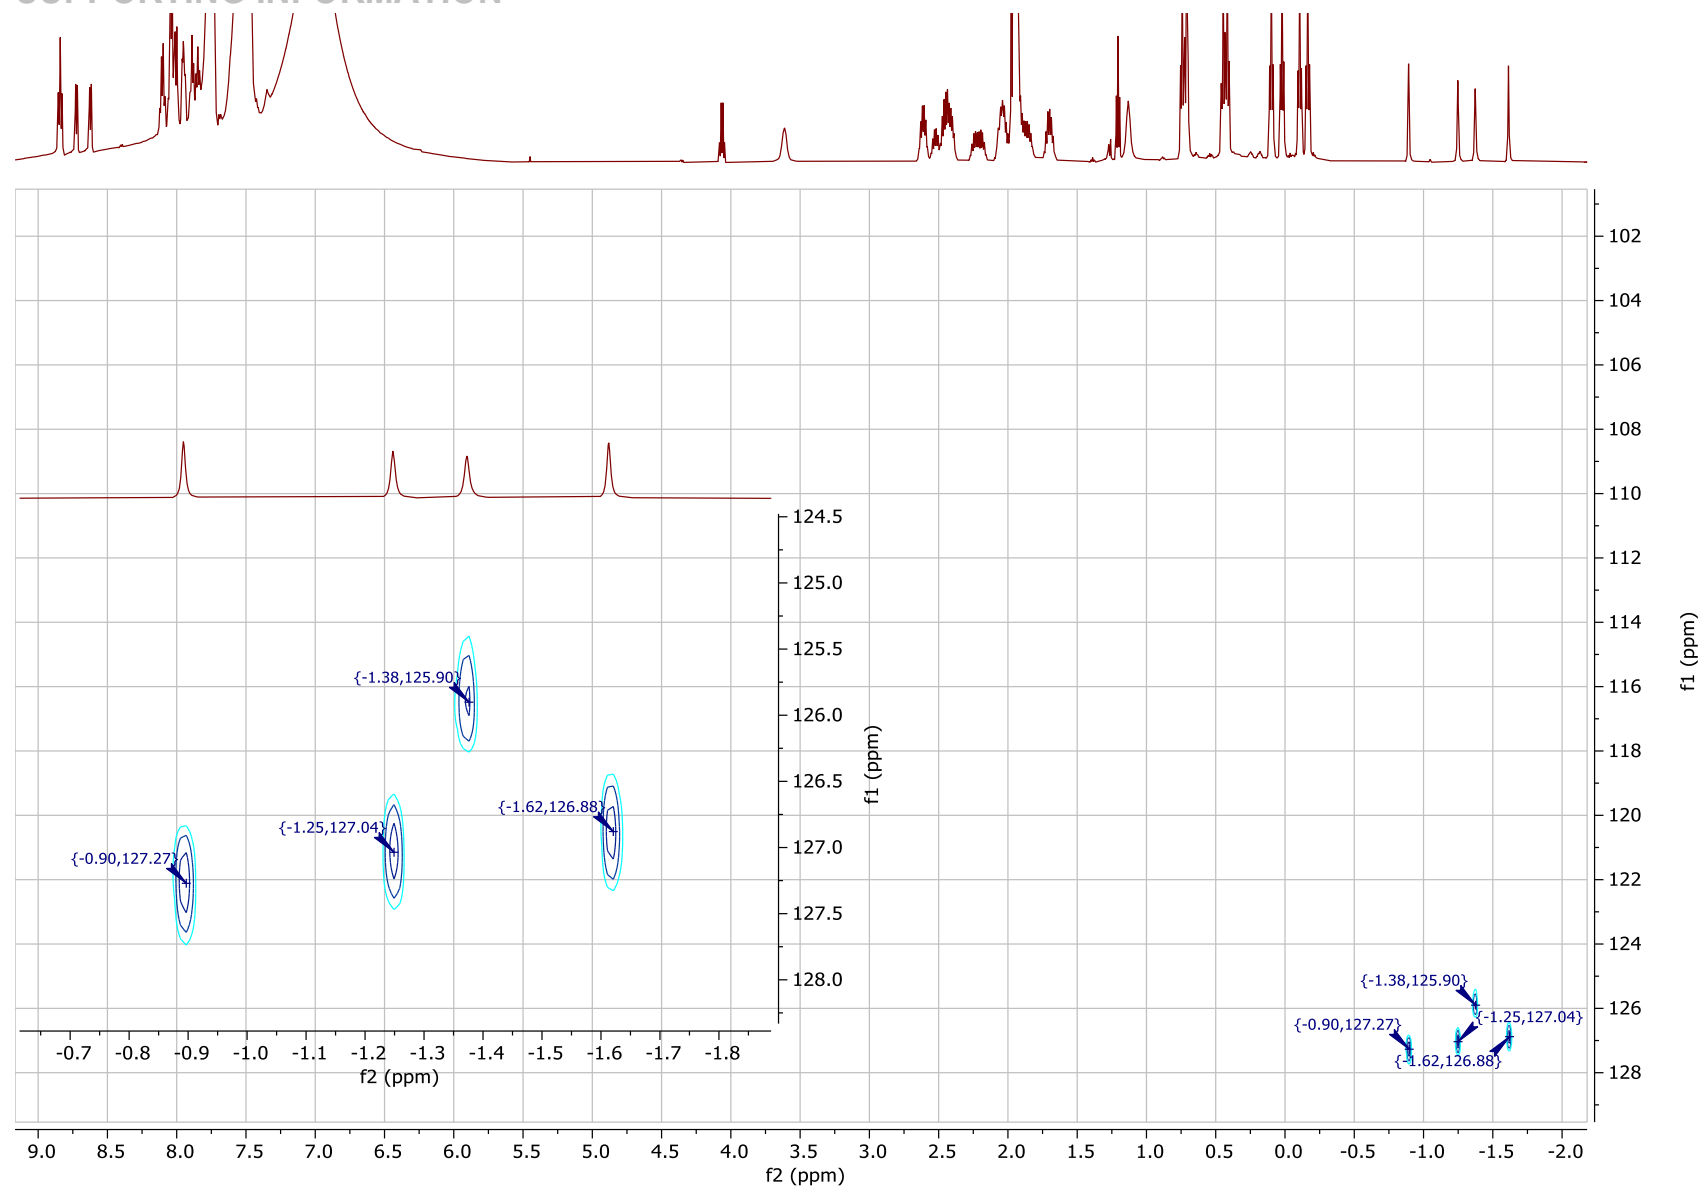

**Figure S30.**  $^1\text{H}$ - $^{15}\text{N}$  HSQC spectrum of  $\alpha_3\beta$ -P1-BSA with expansion of areas of interest (acetonitrile- $d_3$ , 25 °C).

## SUPPORTING INFORMATION

Synthesis and Characterization of  $\alpha_4$ -P1-BSA

**$\alpha, \alpha, \alpha, \alpha$ -5,10,15,20-Tetrakis(2-aminiumphenyl)-2,3,7,8,12,13,17,18-octaethylporphyrin hexa-benzenesulfonic acid salt ( $\alpha_4$ -P1-BSA).** In a sample tube benzenesulfonic acid (0.82 mg; 0.25 mmol; 50 eq.) was dissolved in 1 mL of acetonitrile- $d_3$ . Isomerically pure [ $\alpha, \alpha, \alpha, \alpha$ -5,10,15,20-tetrakis(2-aminophenyl)-2,3,7,8,12,13,17,18-octaethylporphyrinato]nickel(II) (5 mg; 0.005 mmol; 1 eq.) was added in one batch and stirred for 16 hours. The completion of demetalation followed by complex formation was identified by a clear color change (maroon to green) of the solution. During slow evaporation, green/blue shard habit crystals were formed.  $^1\text{H}$  NMR (600 MHz, acetonitrile- $d_3$ )  $\delta$  = 8.63 (d,  $J$  = 7.6 Hz, 4H, Ar-H), 8.13 (t,  $J$  = 7.8 Hz, 4H, Ar-H), 8.04 – 7.98 (m, 8H, Ar-H), 2.62 (dq,  $J$  = 15.1, 7.5 Hz, 4H,  $\text{CH}_2$  (b)), 2.54 (dq,  $J$  = 15.0, 7.5 Hz, 4H,  $\text{CH}_2$  (a)), 2.20 (dq,  $J$  = 15.1, 7.6 Hz, 4H,  $\text{CH}_2$  (b)), 1.78 (dq,  $J$  = 15.0, 7.5 Hz, 4H,  $\text{CH}_2$  (a)), 0.57 (t,  $J$  = 7.6 Hz, 12H,  $\text{CH}_3$  (b)), 0.08 (t,  $J$  = 7.5 Hz, 12H,  $\text{CH}_3$  (a)), -0.82 (s, 2H, N-H (a)), -2.58 (s, 2H, N-H (b)) ppm.;  $^{13}\text{C}$  NMR (151 MHz, acetonitrile- $d_3$ )  $\delta$  = 143.22 ( $\alpha$ -pyrrole (a)), 142.19 ( $\beta$ -pyrrole (a)), 144.9 ( $\alpha$ -pyrrole (b)), 144.77 ( $\beta$ -pyrrole (b)), 140.56 (Ar), 134.32 (Ar), 133.01 (Ar), 131.74 (Ar), 130.72 (Ar), 126.19 (Ar), 114.09 (meso-), 18.88 ( $\text{CH}_2$  (a)), 20.44 ( $\text{CH}_2$  (b)), 15.01 ( $\text{CH}_3$  (b)), 16.15 ( $\text{CH}_3$  (a)) ppm.;  $^{15}\text{N}$  NMR (61 MHz, acetonitrile- $d_3$ )  $\delta$  125.09 (N-H (a)), 125.80 (N-H (b)) ppm.

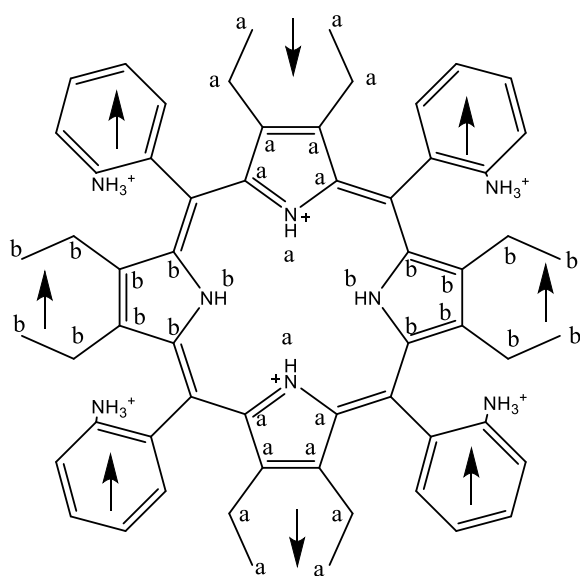

**Figure S31.** Structure of  $\alpha_4$ -P1-BSA highlighting the positions used in NMR characterizations.

## SUPPORTING INFORMATION

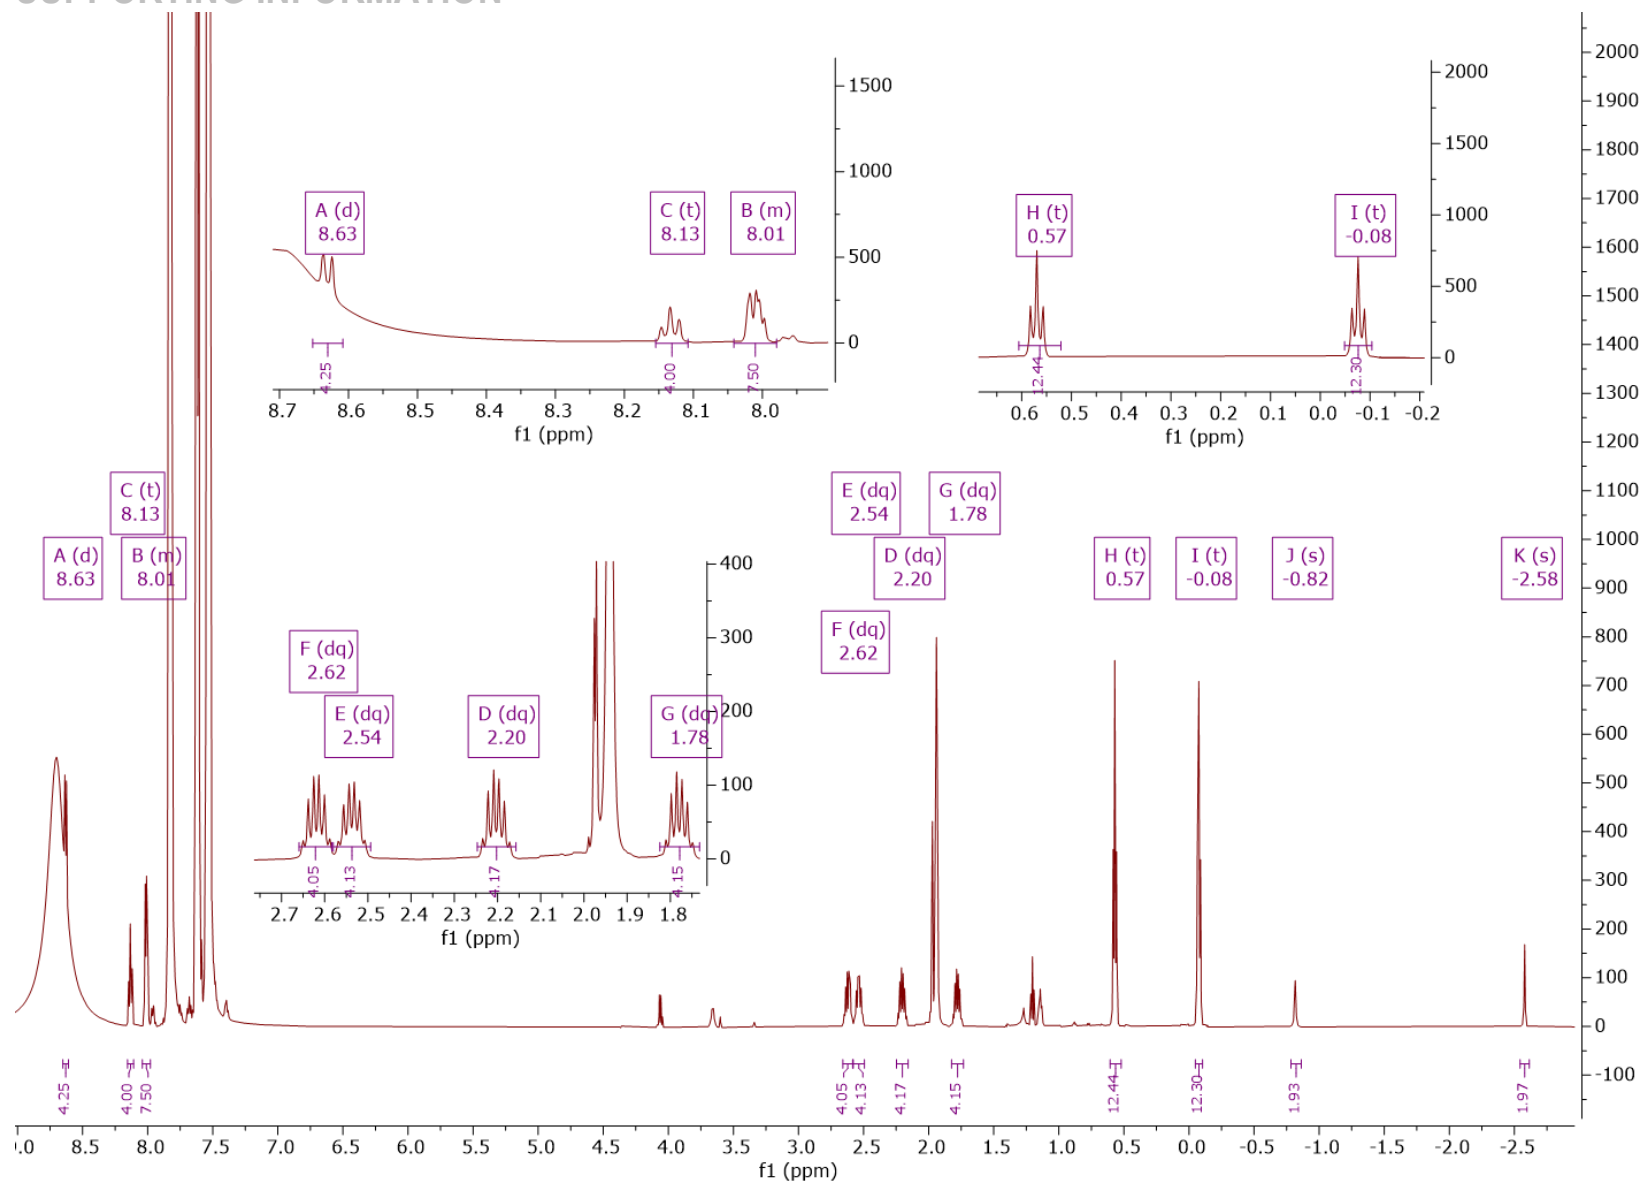

**Figure S32.** <sup>1</sup>H NMR spectrum of  $\alpha_4$ -P1-BSA with expansion of areas of interest (600 MHz, acetonitrile-*d*<sub>3</sub>, 25 °C).

## SUPPORTING INFORMATION

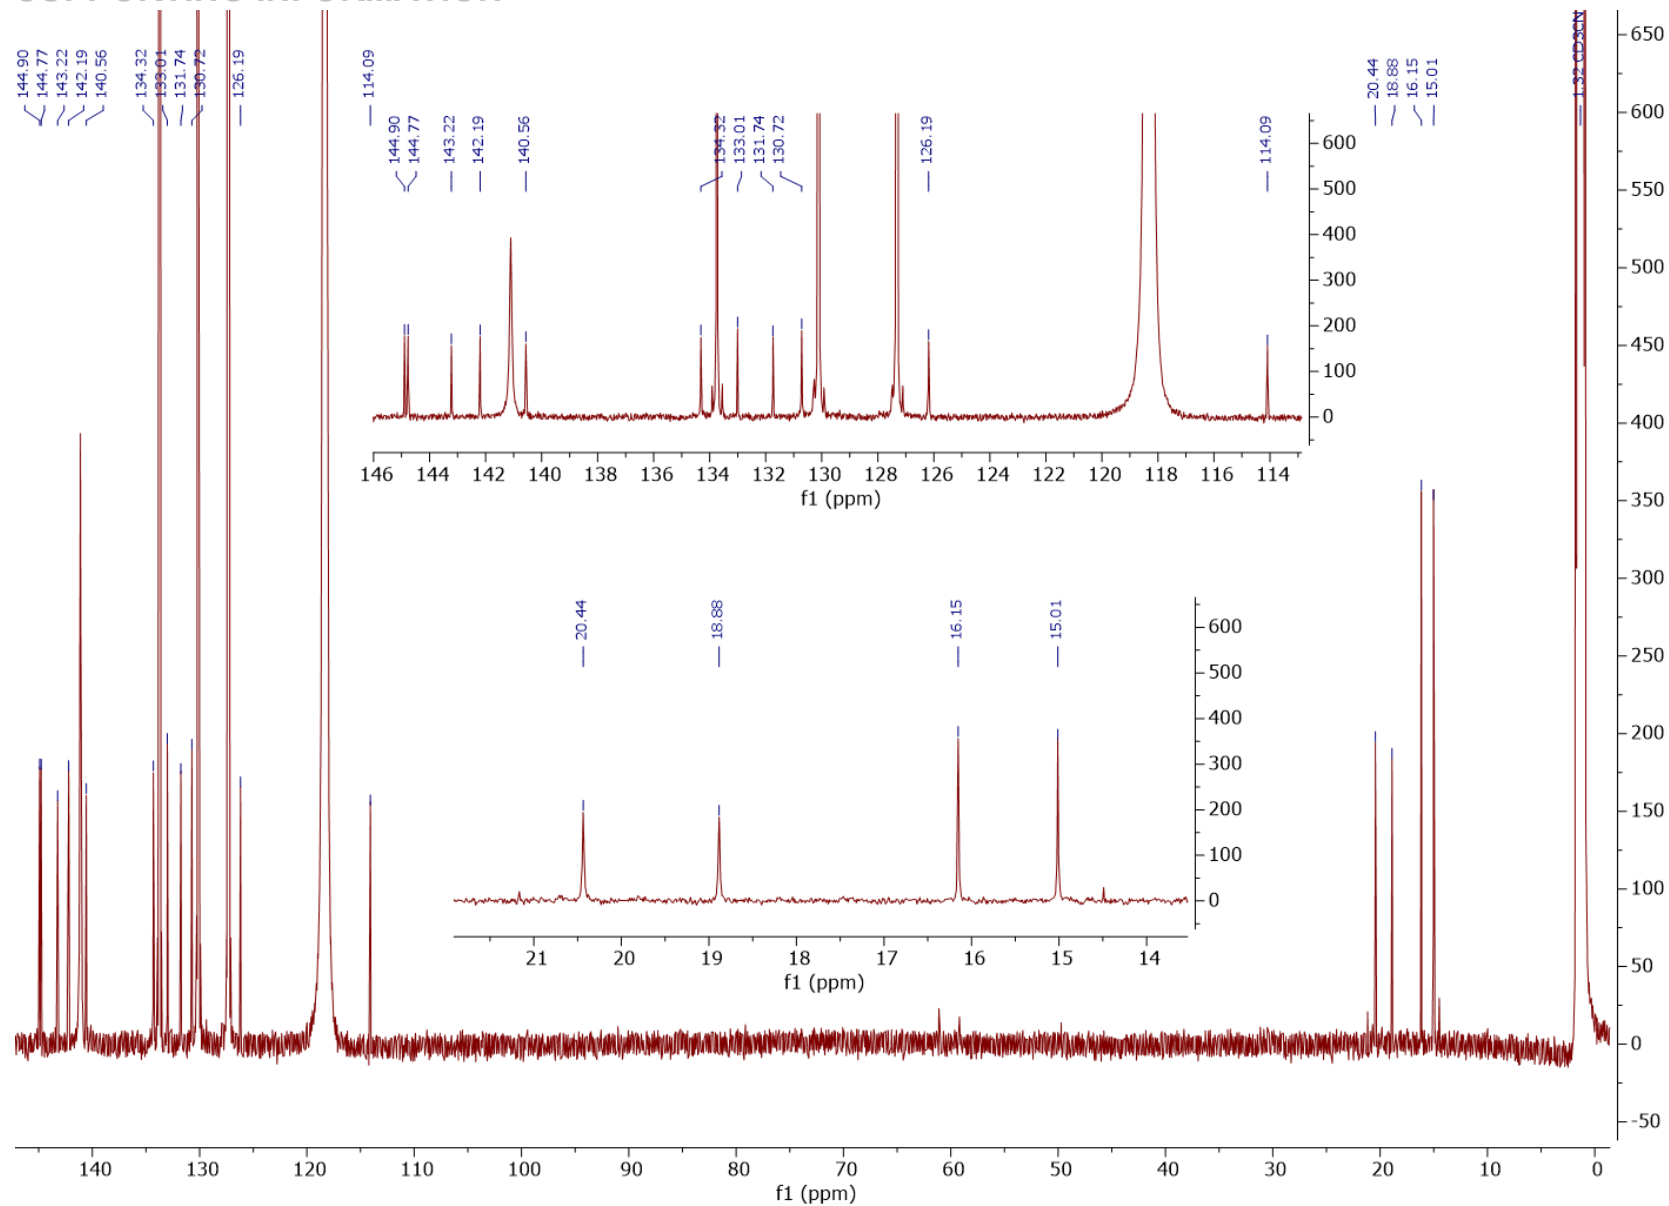

**Figure S33.**  $^{13}\text{C}$  NMR spectrum of  $\alpha_4\text{-P1-BSA}$  with expansion of areas of interest (151 MHz, acetonitrile- $d_3$ , 25 °C).

## SUPPORTING INFORMATION

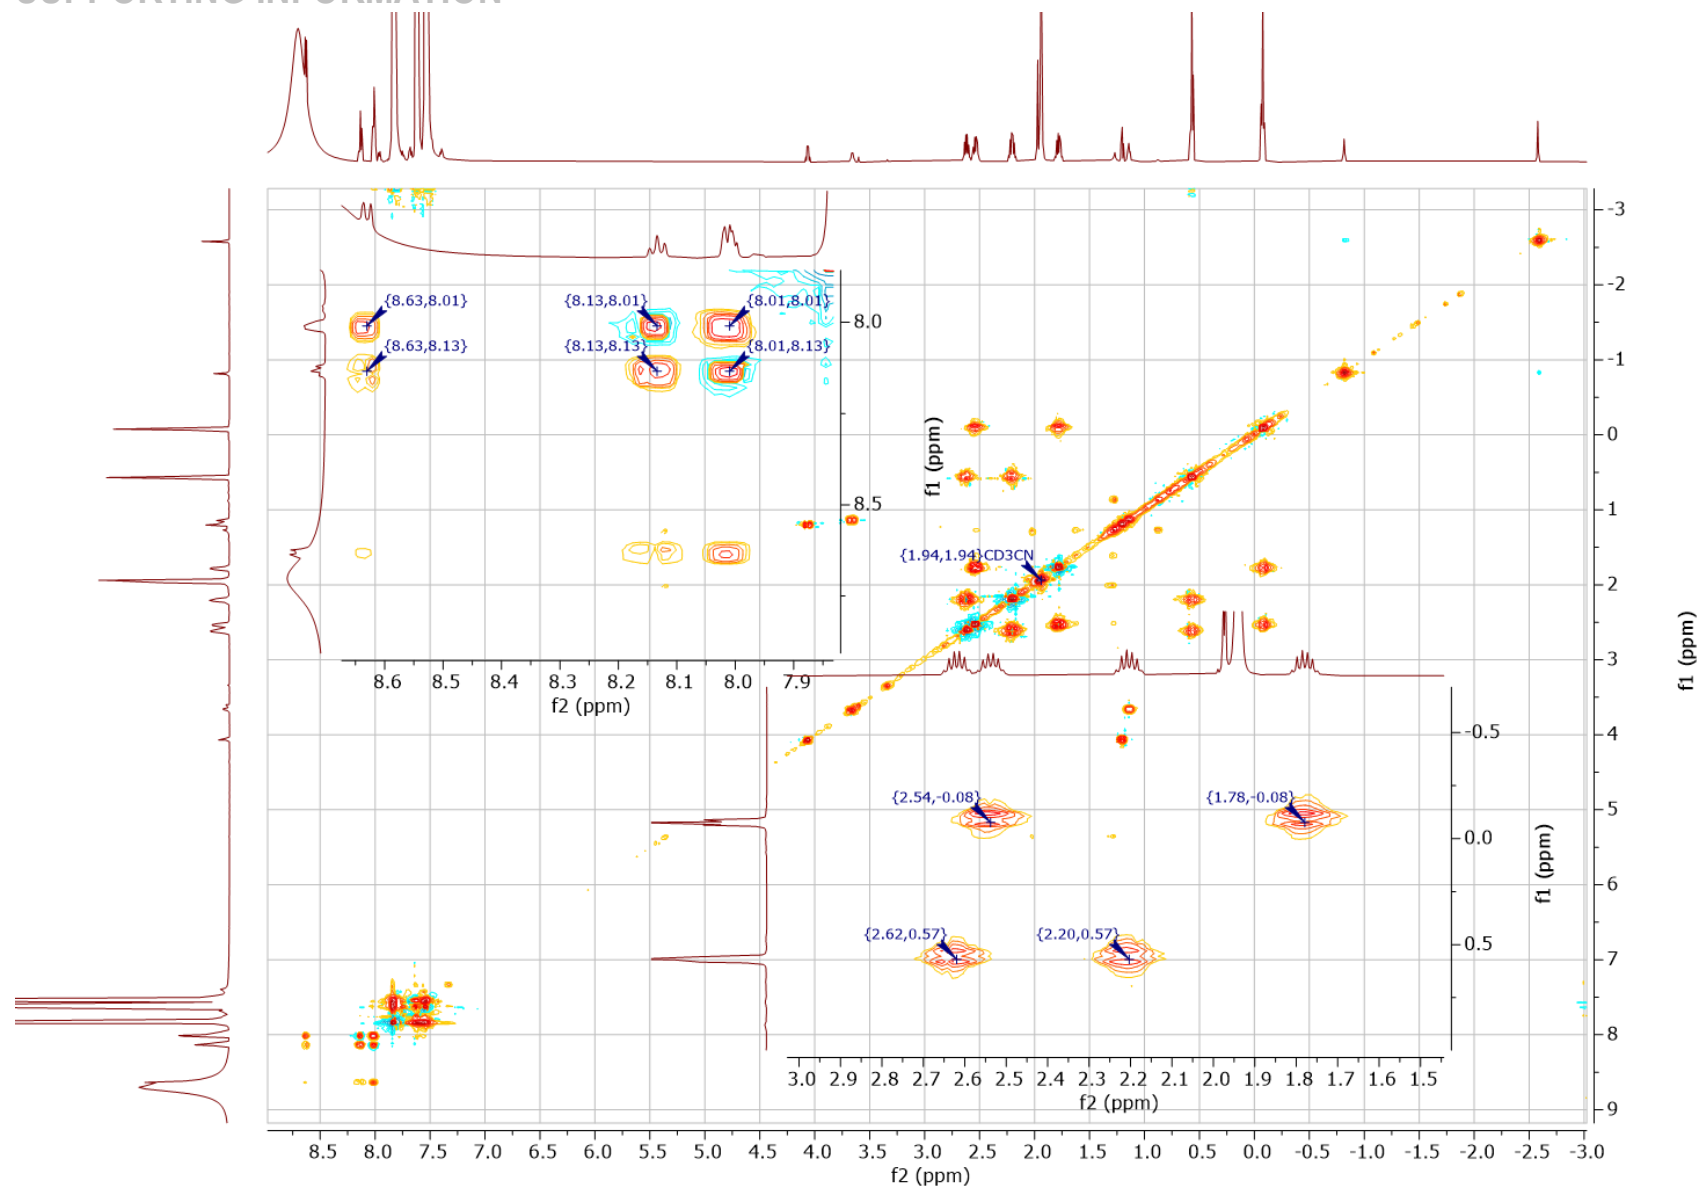

**Figure S34.**  $^1\text{H}$ - $^1\text{H}$  TOCSY spectrum of  $\alpha_4$ -P1-BSA with expansion of areas of interest (acetonitrile- $d_3$ , 25 °C).

## SUPPORTING INFORMATION

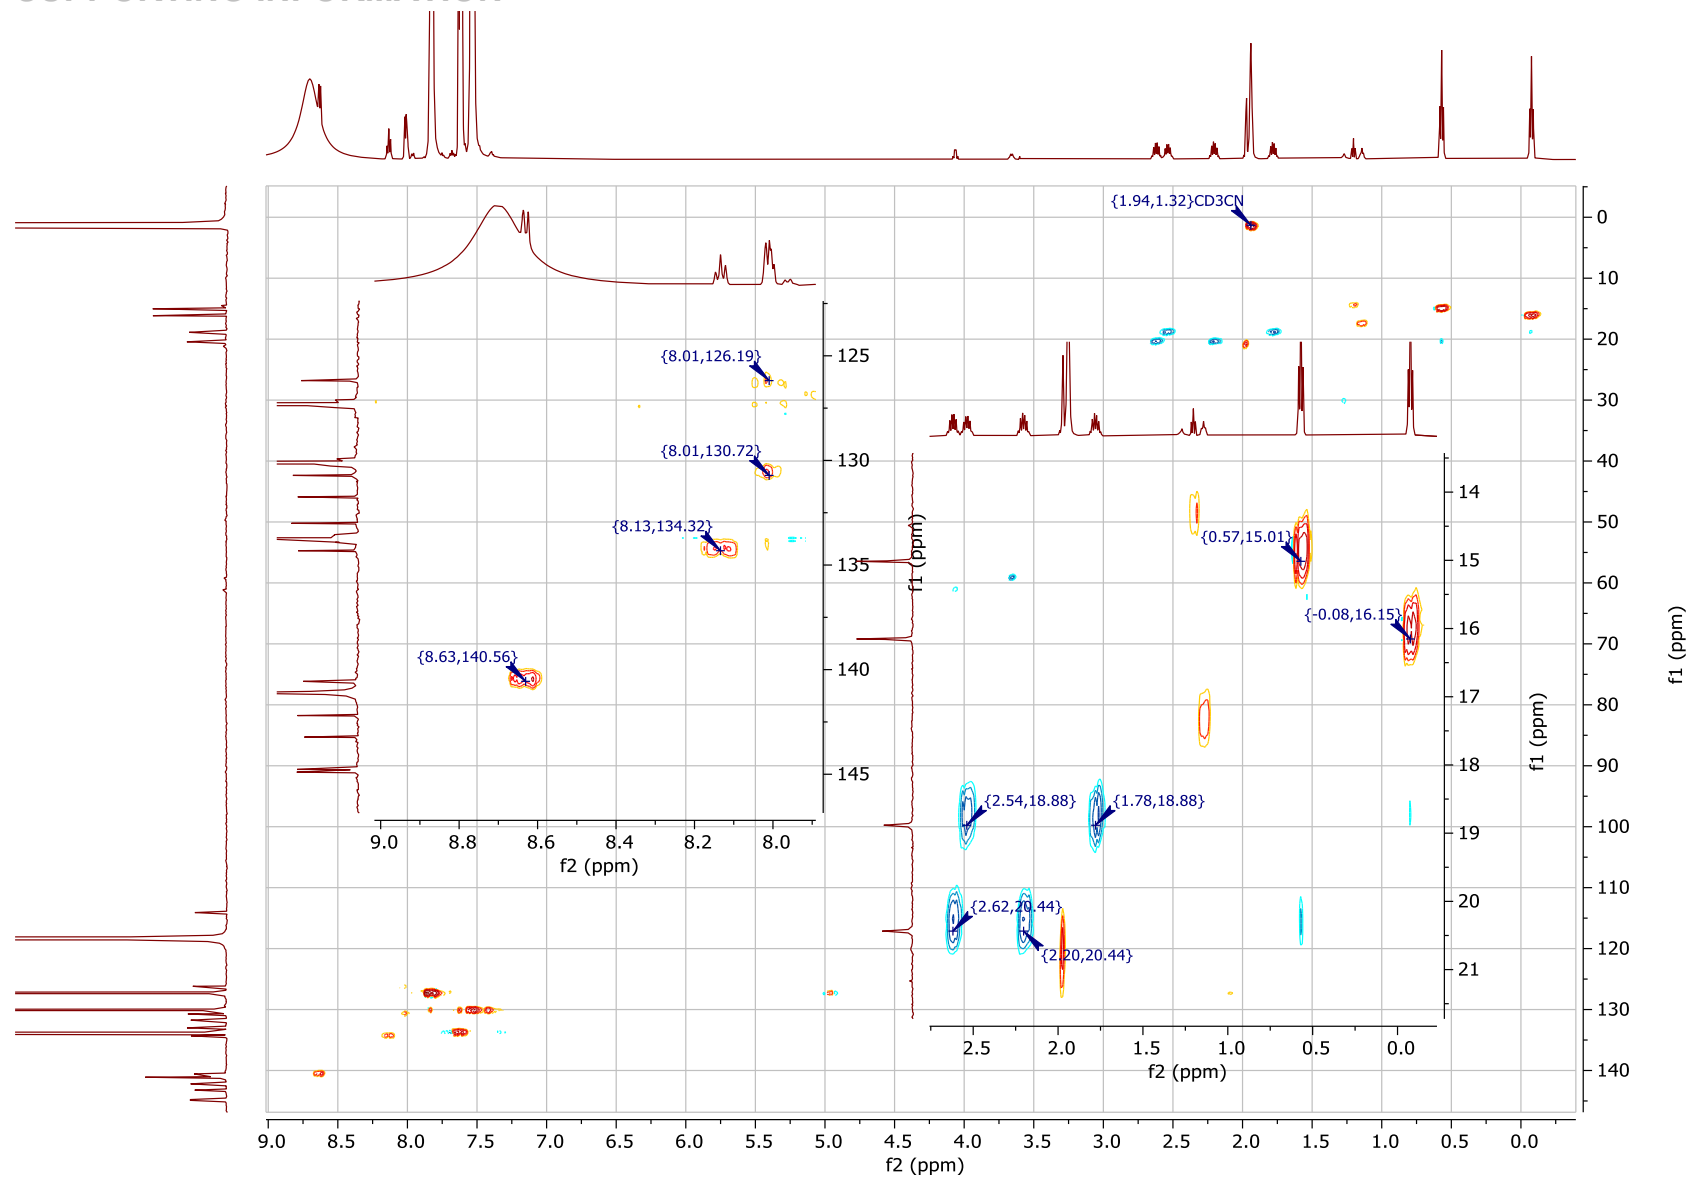

**Figure S35.**  $^1\text{H}$ - $^{13}\text{C}$  HSQC spectrum of  $\alpha_4$ -P1-BSA with expansion of areas of interest (acetonitrile- $d_3$ , 25 °C).

## SUPPORTING INFORMATION

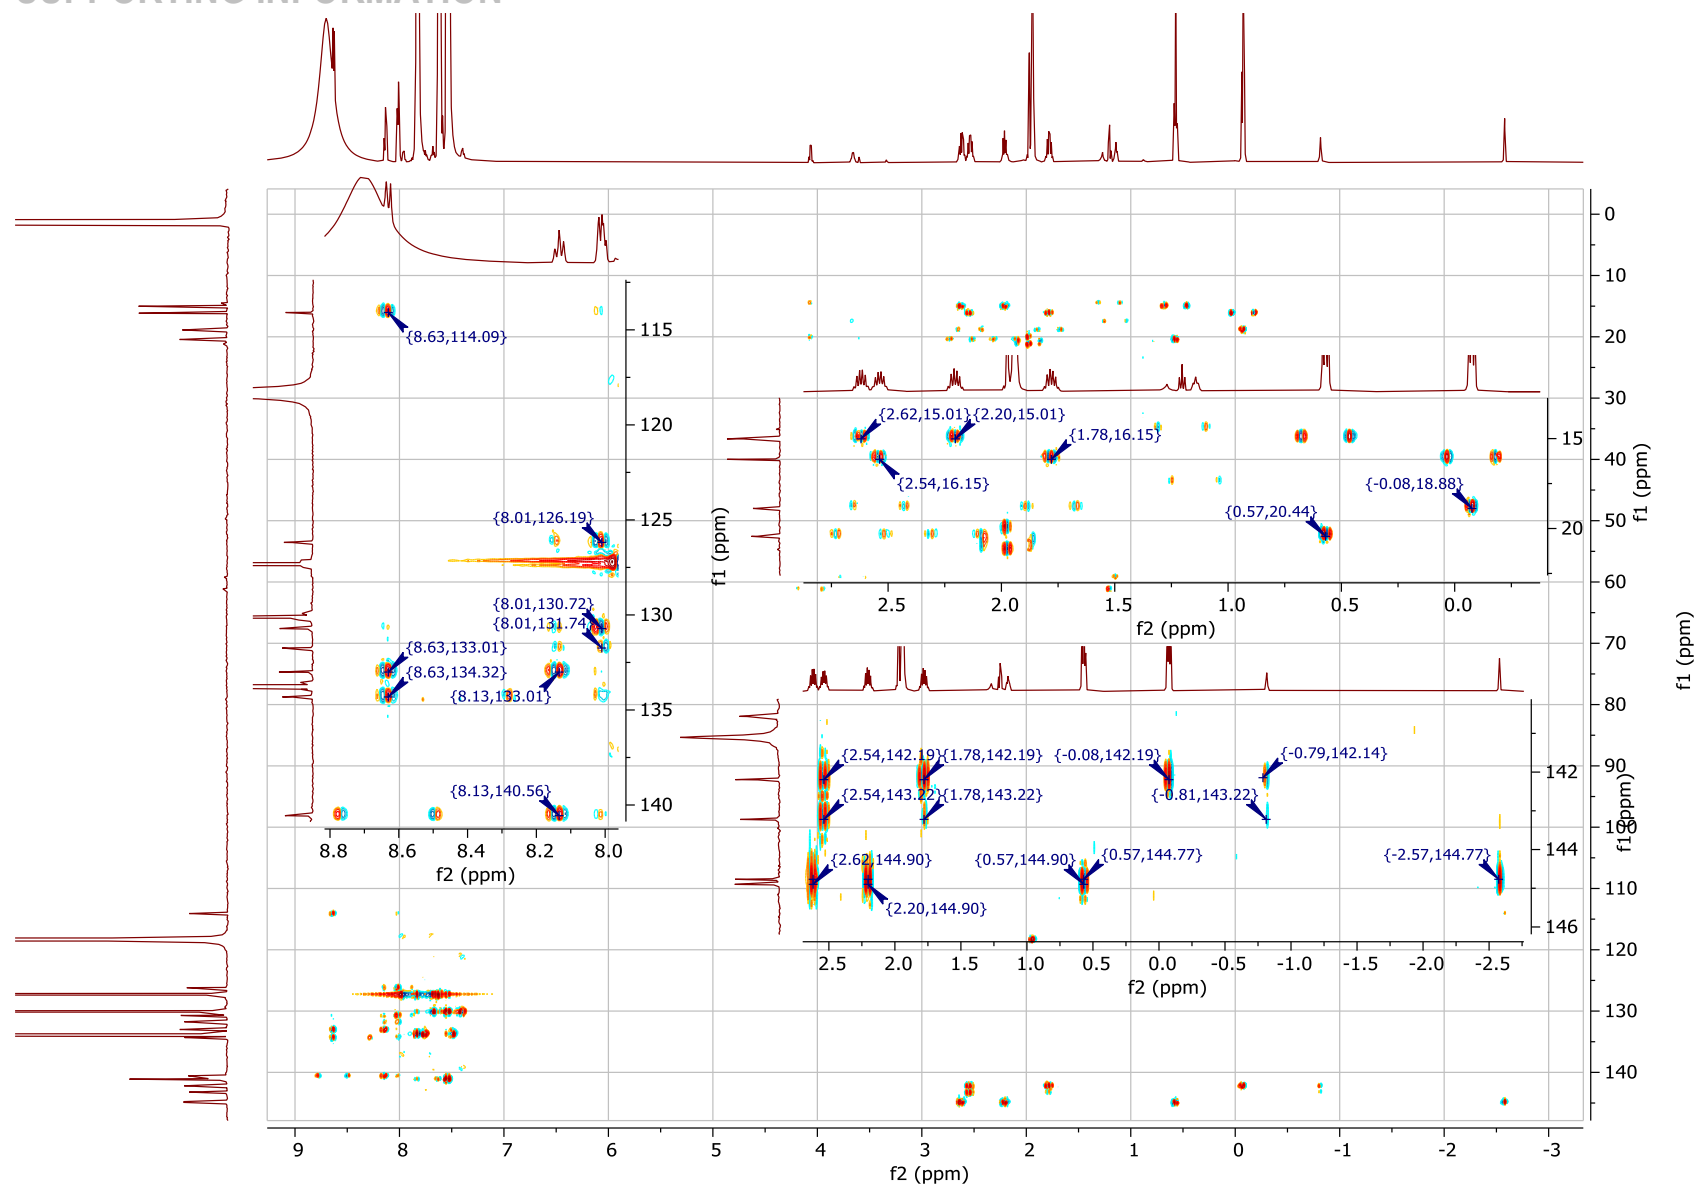

Figure S36.  $^1\text{H}$ - $^{13}\text{C}$  HMBC spectrum of  $\alpha_4$ -P1-BSA with expansion of areas of interest (acetonitrile- $d_3$ , 25  $^\circ\text{C}$ ).

## SUPPORTING INFORMATION

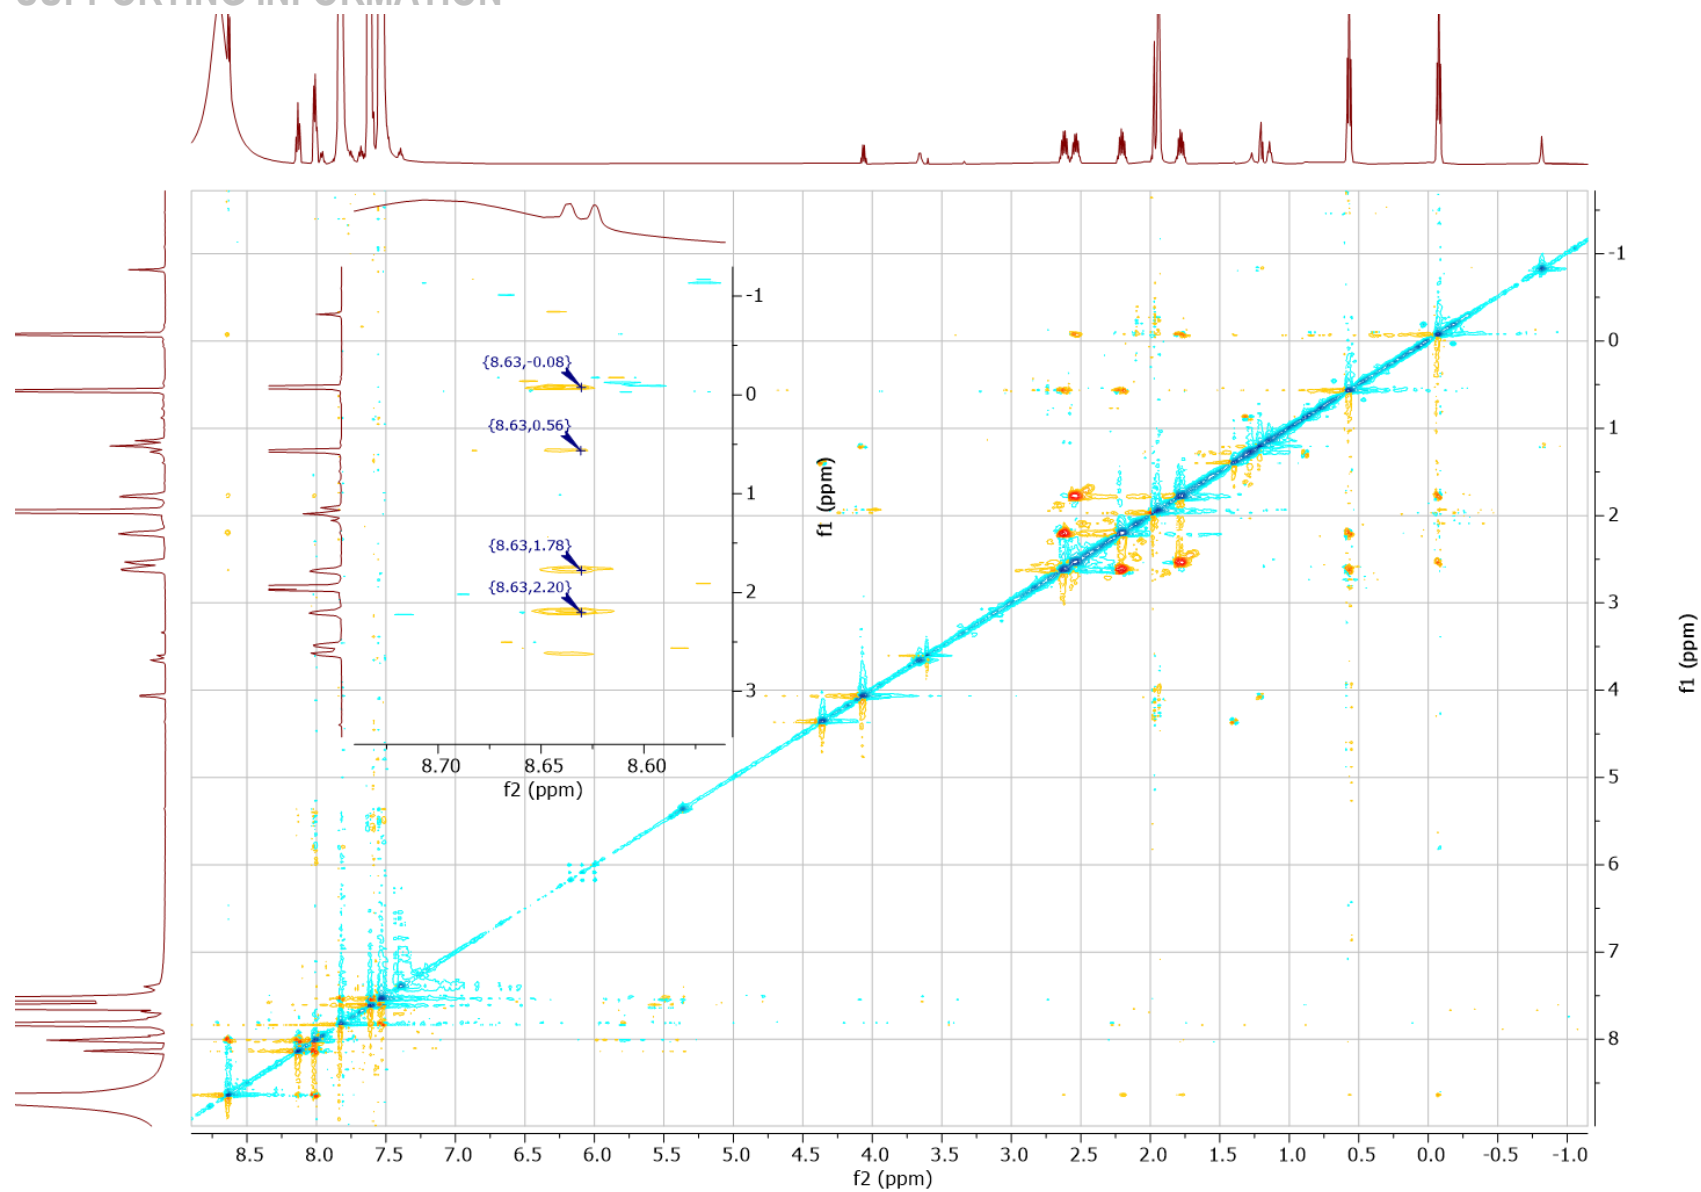

**Figure S37.**  $^1\text{H}$ - $^1\text{H}$  ROESY spectrum of  $\alpha_4$ -P1-BSA with expansion of areas of interest (acetonitrile- $d_3$ , 25 °C).



## SUPPORTING INFORMATION

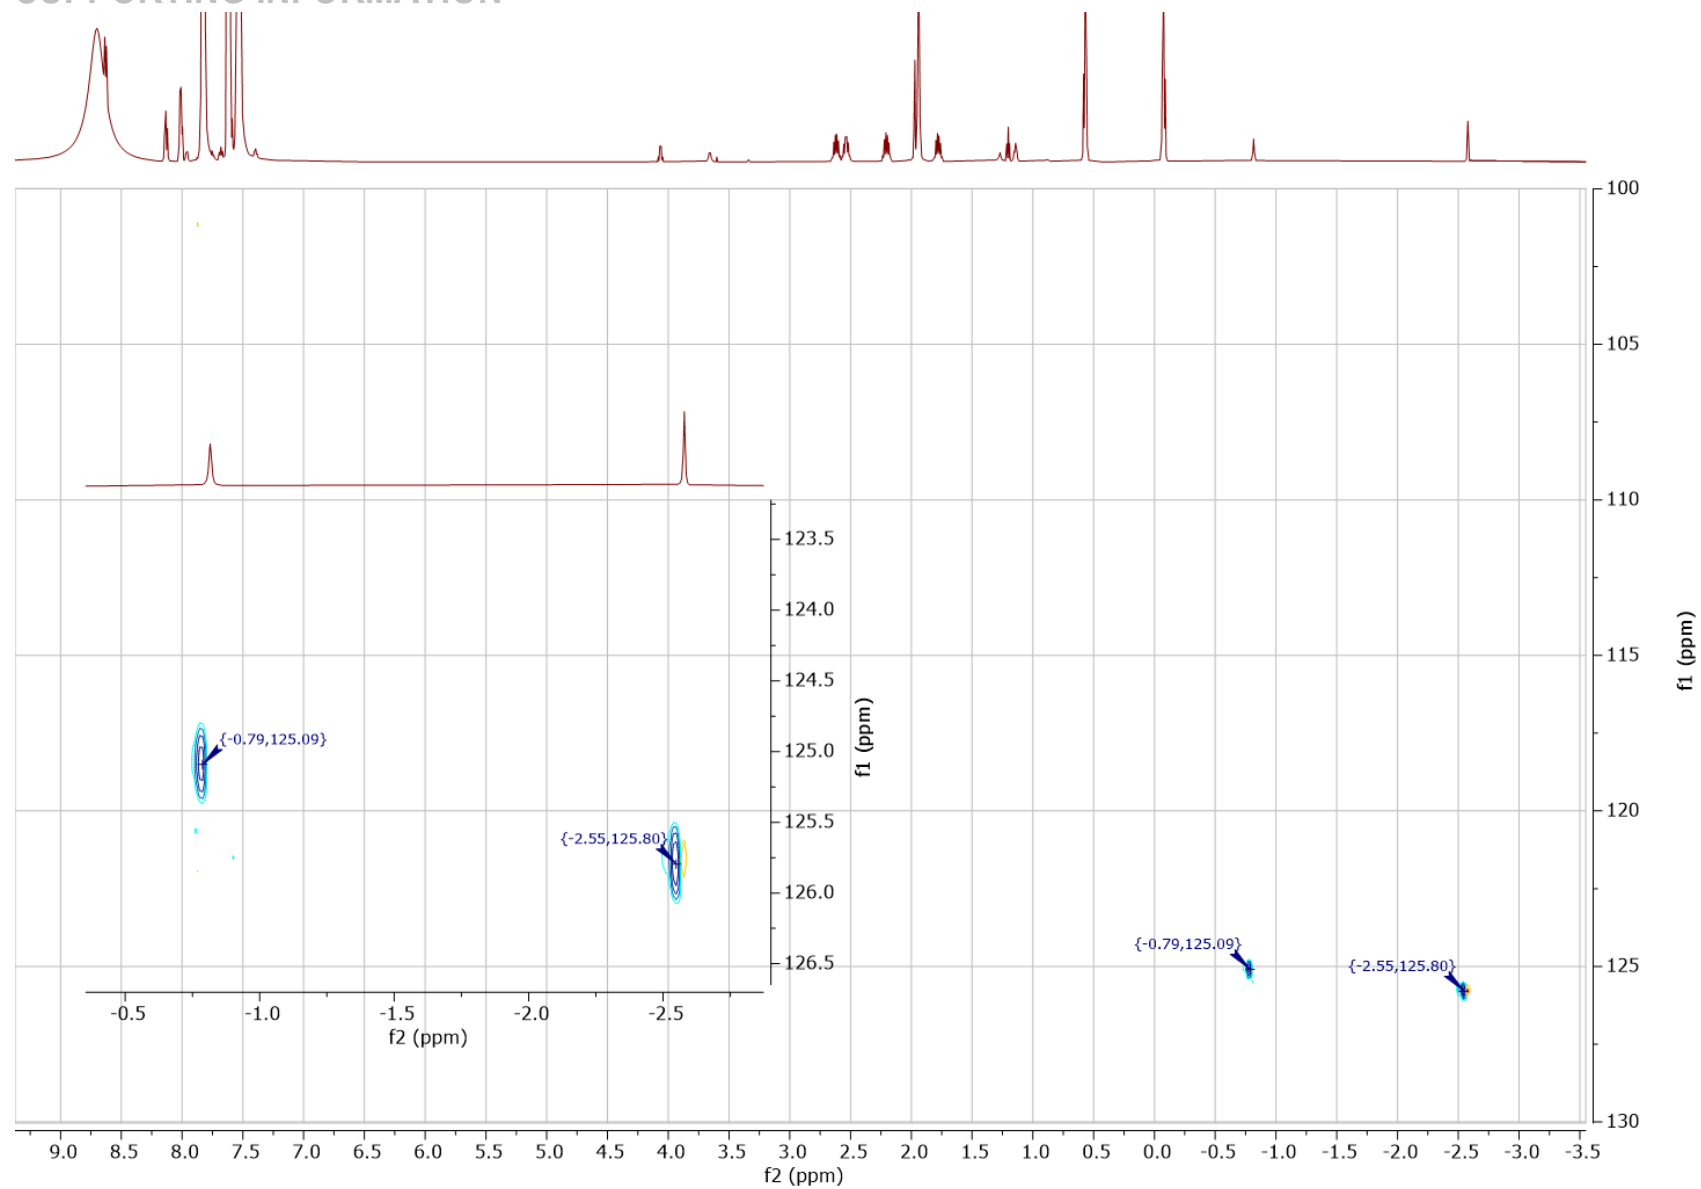

**Figure S38.**  $^1\text{H}$ - $^{15}\text{N}$  HSQC spectrum of  $\alpha_4$ -P1-BSA with expansion of areas of interest (acetonitrile- $d_3$ , 25 °C).

## SUPPORTING INFORMATION

## Determination of Atropisomeric Mixtures by NMR

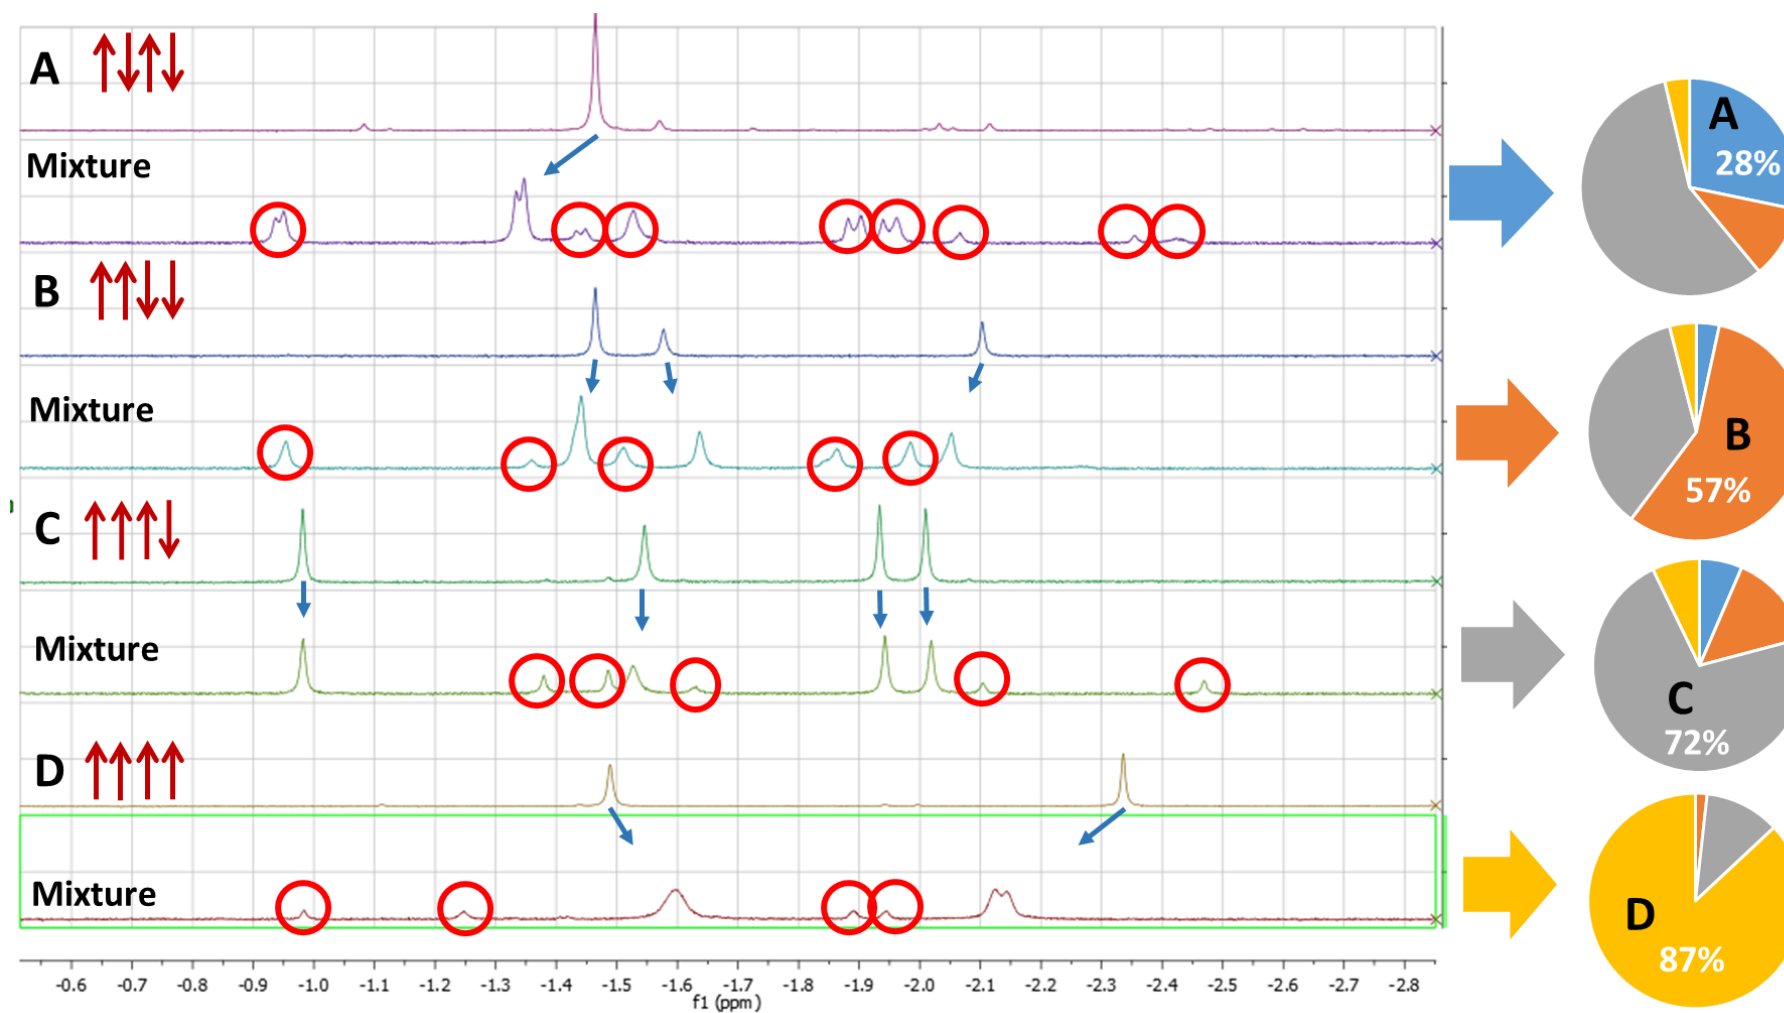

**Figure S39.** An example of atropisomeric mixture determination by <sup>1</sup>H NMR analysis of the porphyrin **P1-MSA** (A:  $\alpha, \beta, \alpha, \beta$ -; B:  $\alpha_2, \beta_2$ -; C:  $\alpha_3, \beta$ -; D:  $\alpha_4$ -) inner core (N–H) signals (acetonitrile-*d*<sub>3</sub>, 25 °C). The mixtures were randomly generated to create comprehensive studies of the unknown samples. The percentage values were obtained by integration of the proton signal

## SUPPORTING INFORMATION

**Table S1.**  $^1\text{H}$ ,  $^{13}\text{C}$  and  $^{15}\text{N}$  NMR signals of **P1-BSA** atropisomers obtained from HSQC and HMBC in  $\text{CD}_3\text{CN}$  ( $\delta$  in ppm). Blue – above and red – below the plane, purple – either above or below the plane depending on the orientation of  $-\text{NH}_3^+$  groups.

| Pos.                    | $\alpha_3\beta$ -P1-BSA |                                            | $\alpha_2\beta_2$ -P1-BSA |                                            | $\alpha,\beta,\alpha,\beta$ -P1-BSA |                                            | $\alpha$ -P1-BSA    |                                            |
|-------------------------|-------------------------|--------------------------------------------|---------------------------|--------------------------------------------|-------------------------------------|--------------------------------------------|---------------------|--------------------------------------------|
|                         | $\delta_{\text{H}}$     | $\delta_{\text{C}}$ or $\delta_{\text{N}}$ | $\delta_{\text{H}}$       | $\delta_{\text{C}}$ or $\delta_{\text{N}}$ | $\delta_{\text{H}}$                 | $\delta_{\text{C}}$ or $\delta_{\text{N}}$ | $\delta_{\text{H}}$ | $\delta_{\text{C}}$ or $\delta_{\text{N}}$ |
| 1                       |                         | 145.1                                      |                           | 144.9                                      |                                     | 143.6                                      |                     | 144.9                                      |
| 2                       |                         | 145.3                                      |                           | 145.6                                      |                                     | 143.8                                      |                     | 144.8                                      |
| 2 <sup>1</sup> (inner)  | 1.91                    | 19.5                                       | 2.48                      | 20.8                                       | 1.86                                | 19.8                                       | 2.62                | 20.4                                       |
| 2 <sup>1</sup> (outer)  | 2.61                    |                                            | 2.19                      |                                            | 2.63                                |                                            | 2.20                |                                            |
| 2 <sup>2</sup>          | 0.02                    | 15.3                                       | 0.71                      | 15.4                                       | 0.05                                | 15.3                                       | 0.57                | 15.0                                       |
| 3                       |                         | 143.3                                      |                           | 145.6                                      |                                     | 144.0                                      |                     | 144.8                                      |
| 3 <sup>1</sup> (inner)  | 2.02                    | 20.7                                       | 2.48                      | 20.8                                       | 2.38                                | 20.6                                       | 2.62                | 20.4                                       |
| 3 <sup>1</sup> (outer)  | 2.24                    |                                            | 2.19                      |                                            | 2.06                                |                                            | 2.20                |                                            |
| 3 <sup>2</sup>          | 0.74                    | 15.6                                       | 0.71                      | 15.4                                       | 0.62                                | 15.6                                       | 0.57                | 15.0                                       |
| 4                       |                         | 144.0                                      |                           | 144.9                                      |                                     | 145.0                                      |                     | 144.9                                      |
| 5                       |                         | 113.4                                      |                           | 112.0                                      |                                     | 113.1                                      |                     | 114.1                                      |
| 5 <sup>1</sup>          |                         | 132.2                                      |                           | 132.0                                      |                                     | 132.1                                      |                     | 131.7                                      |
| 5 <sup>2</sup>          |                         | 133.5                                      |                           | 133.0                                      |                                     | 132.9                                      |                     | 133.0                                      |
| 5 <sup>3</sup>          | 7.96                    | 126.1                                      | 7.90                      | 125.9                                      | 8.02                                | 126.0                                      | 8.01                | 126.2                                      |
| 5 <sup>4</sup>          | 8.03                    | 134.1                                      | 8.08                      | 134.2                                      | 8.11                                | 134.4                                      | 8.13                | 134.3                                      |
| 5 <sup>5</sup>          | 7.89                    | 130.4                                      | 7.94                      | 130.5                                      | 7.99                                | 130.9                                      | 8.01                | 130.7                                      |
| 5 <sup>6</sup>          | 8.85                    | 139.4                                      | 8.74                      | 140.4                                      | 8.92                                | 140.1                                      | 8.63                | 140.6                                      |
| 6                       |                         | 143.7                                      |                           | 144.1                                      |                                     | 143.6                                      |                     | 143.2                                      |
| 7                       |                         | 142.9                                      |                           | 142.0                                      |                                     | 143.8                                      |                     | 142.2                                      |
| 7 <sup>1</sup> (inner)  | 1.85                    | 19.5                                       | 2.63                      | 19.1                                       | 1.86                                | 19.8                                       | 2.54                | 18.2                                       |
| 7 <sup>1</sup> (outer)  | 2.61                    |                                            | 1.85                      |                                            | 2.63                                |                                            | 1.78                |                                            |
| 7 <sup>2</sup>          | 0.10                    | 15.8                                       | -0.04                     | 15.9                                       | 0.05                                | 15.3                                       | 0.08                | 16.2                                       |
| 8                       |                         | 143.4                                      |                           | 143.9                                      |                                     | 144.0                                      |                     | 142.2                                      |
| 8 <sup>1</sup> (inner)  | 2.45                    | 20.2                                       | 2.48                      | 20.5                                       | 2.38                                | 20.6                                       | 2.54                | 18.2                                       |
| 8 <sup>1</sup> (outer)  | 2.05                    |                                            | 2.09                      |                                            | 2.06                                |                                            | 1.78                |                                            |
| 8 <sup>2</sup>          | 0.42                    | 15.3                                       | 0.67                      | 15.2                                       | 0.62                                | 15.6                                       | 0.08                | 16.2                                       |
| 9                       |                         | 144.3                                      |                           | 143.9                                      |                                     | 145.0                                      |                     | 143.2                                      |
| 10                      |                         | 114.9                                      |                           | 114.9                                      |                                     | 113.1                                      |                     | 114.1                                      |
| 10 <sup>1</sup>         |                         | 131.9                                      |                           | 132.1                                      |                                     | 132.1                                      |                     | 131.7                                      |
| 10 <sup>2</sup>         |                         | 133.0                                      |                           | 133.1                                      |                                     | 132.9                                      |                     | 133.0                                      |
| 10 <sup>3</sup>         | 7.94                    | 125.8                                      | 8.06                      | 126.4                                      | 8.02                                | 126.0                                      | 8.01                | 126.2                                      |
| 10 <sup>4</sup>         | 8.04                    | 134.1                                      | 8.12                      | 134.2                                      | 8.11                                | 134.4                                      | 8.13                | 134.3                                      |
| 10 <sup>5</sup>         | 7.85                    | 130.6                                      | 8.03                      | 130.6                                      | 7.99                                | 130.9                                      | 8.01                | 130.7                                      |
| 10 <sup>6</sup>         | 8.83                    | 140.8                                      | 8.66                      | 139.8                                      | 8.92                                | 140.1                                      | 8.63                | 140.6                                      |
| 11                      |                         | 143.4                                      |                           | 142.8                                      |                                     | 143.6                                      |                     | 144.9                                      |
| 12                      |                         | 143.3                                      |                           | 142.9                                      |                                     | 143.8                                      |                     | 144.8                                      |
| 12 <sup>1</sup> (inner) | 2.41                    | 19.3                                       | 2.37                      | 19.1                                       | 1.86                                | 19.8                                       | 2.62                | 20.4                                       |
| 12 <sup>1</sup> (outer) | 1.69                    |                                            | 1.66                      |                                            | 2.63                                |                                            | 2.20                |                                            |
| 12 <sup>2</sup>         | -0.11                   | 15.7                                       | -0.19                     | 15.9                                       | 0.05                                | 15.3                                       | 0.57                | 15.0                                       |
| 13                      |                         | 142.0                                      |                           | 142.9                                      |                                     | 144.0                                      |                     | 144.8                                      |
| 13 <sup>1</sup> (inner) | 2.41                    | 19.0                                       | 2.37                      | 19.1                                       | 2.38                                | 20.6                                       | 2.62                | 20.4                                       |
| 13 <sup>1</sup> (outer) | 1.71                    |                                            | 1.66                      |                                            | 2.06                                |                                            | 2.20                |                                            |
| 13 <sup>2</sup>         | -0.16                   | 16.0                                       | -0.19                     | 15.9                                       | 0.62                                | 15.6                                       | 0.57                | 15.0                                       |
| 14                      |                         | 142.7                                      |                           | 142.8                                      |                                     | 145.0                                      |                     | 144.9                                      |
| 15                      |                         | 113.4                                      |                           | 114.9                                      |                                     | 113.1                                      |                     | 114.1                                      |
| 15 <sup>1</sup>         |                         | 132.2                                      |                           | 132.1                                      |                                     | 132.1                                      |                     | 131.7                                      |
| 15 <sup>2</sup>         |                         | 133.1                                      |                           | 133.1                                      |                                     | 132.9                                      |                     | 133.0                                      |
| 15 <sup>3</sup>         | 8.00                    | 126.1                                      | 8.06                      | 126.4                                      | 8.02                                | 126.0                                      | 8.01                | 126.2                                      |
| 15 <sup>4</sup>         | 8.11                    | 134.2                                      | 8.12                      | 134.2                                      | 8.11                                | 134.4                                      | 8.13                | 134.3                                      |
| 15 <sup>5</sup>         | 8.00                    | 130.5                                      | 8.03                      | 130.6                                      | 7.99                                | 130.9                                      | 8.01                | 130.7                                      |
| 15 <sup>6</sup>         | 8.62                    | 140.4                                      | 8.66                      | 139.8                                      | 8.92                                | 140.1                                      | 8.63                | 140.6                                      |
| 16                      |                         | 145.6                                      |                           | 143.9                                      |                                     | 143.6                                      |                     | 143.2                                      |
| 17                      |                         | 143.8                                      |                           | 143.9                                      |                                     | 143.8                                      |                     | 142.2                                      |
| 17 <sup>1</sup> (inner) | 2.52                    | 20.6                                       | 2.48                      | 20.5                                       | 1.86                                | 19.8                                       | 2.54                | 18.2                                       |
| 17 <sup>1</sup> (outer) | 2.19                    |                                            | 2.09                      |                                            | 2.63                                |                                            | 1.78                |                                            |
| 17 <sup>2</sup>         | 0.71                    | 15.3                                       | 0.67                      | 15.2                                       | 0.05                                | 15.3                                       | 0.08                | 16.2                                       |
| 18                      |                         | 144.7                                      |                           | 142.0                                      |                                     | 144.0                                      |                     | 142.2                                      |
| 18 <sup>1</sup> (inner) | 2.45                    | 20.2                                       | 2.63                      | 19.1                                       | 2.38                                | 20.6                                       | 2.54                | 18.2                                       |
| 18 <sup>1</sup> (outer) | 2.05                    |                                            | 1.85                      |                                            | 2.06                                |                                            | 1.78                |                                            |
| 18 <sup>2</sup>         | 0.45                    | 15.7                                       | -0.04                     | 15.9                                       | 0.62                                | 15.6                                       | 0.08                | 16.2                                       |
| 19                      |                         | 144.9                                      |                           | 144.1                                      |                                     | 145.0                                      |                     | 143.2                                      |
| 20                      |                         | 111.5                                      |                           | 112.0                                      |                                     | 113.1                                      |                     | 114.1                                      |
| 20 <sup>1</sup>         |                         | 131.9                                      |                           | 132.0                                      |                                     | 132.1                                      |                     | 131.7                                      |
| 20 <sup>2</sup>         |                         | 133.2                                      |                           | 133.0                                      |                                     | 132.9                                      |                     | 133.0                                      |
| 20 <sup>3</sup>         | 8.04                    | 126.1                                      | 7.90                      | 125.9                                      | 8.02                                | 126.0                                      | 8.01                | 126.2                                      |
| 20 <sup>4</sup>         | 8.09                    | 134.1                                      | 8.08                      | 134.2                                      | 8.11                                | 134.4                                      | 8.13                | 134.3                                      |
| 20 <sup>5</sup>         | 8.03                    | 130.7                                      | 7.94                      | 130.5                                      | 7.99                                | 130.9                                      | 8.01                | 130.7                                      |
| 20 <sup>6</sup>         | 8.72                    | 140.2                                      | 8.74                      | 140.4                                      | 8.92                                | 140.1                                      | 8.63                | 140.6                                      |
| 21                      | -1.25                   | 127.0                                      | -2.15                     | 125.9                                      | -1.42                               | 126.5                                      | -2.58               | 125.8                                      |
| 22                      | -0.89                   | 127.3                                      | -1.08                     | 127.0                                      | -1.42                               | 126.5                                      | -0.82               | 125.1                                      |
| 23                      | -1.37                   | 125.9                                      | -1.38                     | 126.9                                      | -1.42                               | 126.5                                      | -2.58               | 125.8                                      |
| 24                      | -1.61                   | 126.9                                      | -1.08                     | 127.0                                      | -1.42                               | 126.5                                      | -0.82               | 125.1                                      |

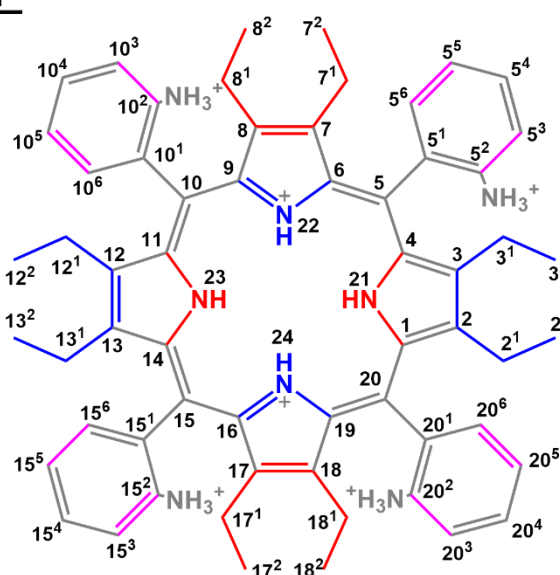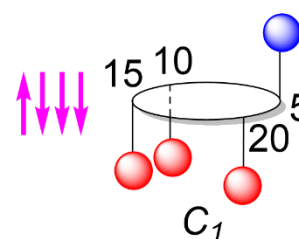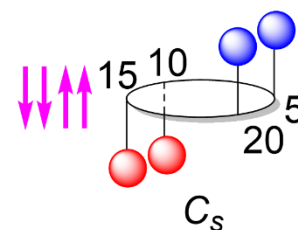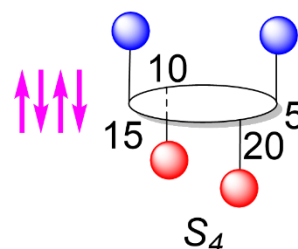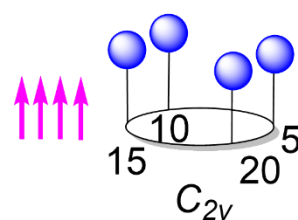

## SUPPORTING INFORMATION

## Structural Determination of Receptor-Substrate Complexes and Atropisomers

In the structure of  $\alpha_3, \beta\text{-P1} \cdot [\text{HSO}_4^-]_6 [\text{H}_2\text{SO}_4] [\text{CH}_3\text{OH}] [\text{H}_2\text{O}]_4$  the counter anion  $\text{HSO}_4^-$  was modeled over two positions S3, S1D using rigid models and SIMU, SADI, ISOR restraints in an 80:20 % occupancy. Another  $\text{HSO}_4^-$  entity was modeled over three positions (S4, S1D, S1C) using rigid models and SIMU restraint in a 50:30:20 % occupancy. Yet another  $\text{HSO}_4^-$  was modeled over four positions (S2D, S2C, S2B, S5) using rigid models and SIMU restraint in a 20:10:20:50 % occupancy. One  $\text{H}_2\text{SO}_4$  was modeled over three positions (S7, S3D, S1A) using rigid models and SIMU restraint in a 30:30:40 % occupancy. One MeOH molecule was modeled over four positions (C2S, C1S, C3S, C4S) using SIMU, ISOR, SADI and DFIX restraint in a 25:25:20:30 % occupancy. One of the solvent  $\text{H}_2\text{O}$  molecules was modeled over two positions (O2CA and O32) using restraint ISOR in a 40:60 % occupancy. All of the phenyl rings of the porphyrin at C5, C10, C15, and C20 were modeled over two positions at 43:57, 50:50, 74:26, 50:50 and fixed using command AFIX 66, SIMU and SADI. Six of the ethyl groups at C2, C3, C8, C12, C13, and C17 were modeled over two positions at 10:90, 24:74, 62:38, 49:51, 26:74 and 10:90 % occupancy, respectively using SIMU and SADI restraints.

In the structure of  $\alpha_4\text{-P1} \cdot [\text{C}_6\text{H}_5\text{SO}_3^-]_6 [\text{H}_2\text{O}] [\text{CD}_3\text{CN}]_2$  two of the acetonitrile solvent molecules were modeled over seven positions (N5, N6, N7, N4A, N3A, N1A, N2A) using rigid models and SIMU restrains in 15:50:50:25:20:25:15 % occupancy. One of the benzenesulfonic acids was modeled over two positions (S1B, S3) using rigid models and SIMU, DFIX restraints in a 55:45 % occupancy. Phenyl rings of three benzenesulfonic acids were modeled over two positions (S1, S2, S5) using AFIX 66, SIMU and DFIX restraints in a 40:60 %, 67:33 %, 75:25 % occupancy, respectively. Moreover, benzenesulfonic acid (S5) oxygen atoms were modeled in 75:25 % occupancy along with the phenyl ring. Three ethyl groups at C7, C8, and C13 were modeled over two positions in 71:29 %, 17:29 %, 55:45 % occupancy, respectively using SIMU and SADI restrains.

In the structure of  $\alpha_3, \beta\text{-P1} \cdot [\text{C}_6\text{H}_5\text{SO}_3^-]_6 [\text{H}_2\text{O}]_2$  three of the benzenesulfonic acid molecules were modeled over 2 positions (S3 and S1A, S5 and S3A, S1 and S1C) using rigid models and SIMU restrains in 53:47%, 36:64% 60:40% occupancy, respectively. Oxygen atoms of two benzenesulfonic acid molecules (S2 and S4) were modeled over 2 positions using SIMU and SADI restrains in 75:25 %, 26:74 % occupancy, respectively. One of the benzenesulfonic acid molecule was modeled over 5 positions (S1D, S1B, S2A, S2C, and S6) using rigid models and SIMU restraints in 20:25:15:25:15 % occupancy. The ethyl group at C13 was modeled over 2 positions in 24:76 % occupancy using SIMU and SADI restraints. Another ethyl group was modeled over two positions (C1A and C2) in 72:28 % occupancy using SIMU and SADI restraints. One of the phenyl rings at C20 was modeled over two positions in 40:60 % occupancy and fixed using command AFIX 66, SIMU and SADI. The structure contains a solvent accessible void that contained a small number of solvent molecules (around 38 electrons), possibly methanol or acetonitrile; however, due to high disorder, these could not be modeled and were omitted using PLATON squeeze.

In the structure of  $\alpha_4\text{-P1} \cdot [(\text{CH}_3)_2\text{SO}]_5$  three of the dimethyl sulfoxide molecules were modeled over 2 positions (S1 and S1A, S4 and S4A, S3 and S3A, S5 and S5A) using SIMU and SUMP restraints in 4:96%, 89:11% 93:7% occupancies, respectively. One of the dimethyl sulfoxide solvent molecules was modeled over 3 positions (S8, S8A, and S5B) using SIMU and SUMP restraints in 56:27:17 % occupancy.

In the structure of  $\text{CP1} \cdot [\text{BF}_4^-]_2$  the collected diffraction pattern was found to have cubic symmetry, and a solution was found in cubic space group  $I\bar{4}3d$ . This compound was disordered over two orientations related by 180-degree rotation of the aryl rings in a refined ratio of 0.50(11) : 0.50(11). One of the ethyl groups was similarly disordered over two positions, between a pseudo-cis and pseudo-trans orientation at a refined ratio of 0.684(15) : 0.316(15). The  $\text{BF}_4^-$  anion was disordered over two overlapping symmetry-equivalent orientations and held to an occupancy of 0.5. In each case, symmetry-related atoms were held to SADI and SIMU restraints to prevent overfitting. A global loose SIMU restraint was also applied, due to weak high angle data. Due to these disordered components, the derived Flack parameter is meaningless, and no direct evidence can be brought to bear on the atropisomeric ratios in this crystal determination. The squeeze routine in PLATON was used to account for highly disordered solvent (6 water molecules per unit formula).

In the structure of  $\alpha_3, \beta\text{-P1}$  the ethyl groups at C2, C3, C7, C8, C12, C13, and C17 were modeled over 2 positions in 68:22 13:87 26:74 30:70 66:34 80:20 3:97 % occupancy, respectively using SIMU and SADI restraints. Four of the phenyl rings at C5, C10, C15, and C20 were modeled over two positions in 35:65 % occupancy and fixed using command AFIX 66, SIMU and SADI. The structure contained a solvent-accessible void with a small number of solvent molecules, possibly methanol and water or dichloromethane; however, due to a high degree of disorder, these could not be modeled and were omitted using PLATON squeeze.

## SUPPORTING INFORMATION

**Table S2.** Details of XRD data refinement of  $\alpha\text{-P1}\cdot[\text{C}_6\text{H}_5\text{SO}_3^-]_6[\text{H}_2\text{O}][\text{CD}_3\text{CN}]_2$ ,  $\alpha\text{-1}\cdot[(\text{CH}_3)_2\text{SO}]_5$  and  $\text{CP1}\cdot[\text{BF}_4^-]_2$ .

| <b>Compound</b>                         | $\alpha\text{-P1}\cdot[\text{C}_6\text{H}_5\text{SO}_3^-]_6[\text{H}_2\text{O}][\text{CD}_3\text{CN}]_2$ | $\alpha\text{-1}\cdot[(\text{CH}_3)_2\text{SO}]_5$         | $\text{CP1}\cdot[\text{BF}_4^-]_2$                         |
|-----------------------------------------|----------------------------------------------------------------------------------------------------------|------------------------------------------------------------|------------------------------------------------------------|
| CCDC #                                  | 2012196                                                                                                  | 2012199                                                    | 2012200                                                    |
| Empirical formula                       | $\text{C}_{100}\text{H}_{104}\text{D}_6\text{N}_{10}\text{O}_{19}\text{S}_6$                             | $\text{C}_{70}\text{H}_{96}\text{N}_8\text{O}_5\text{S}_5$ | $\text{C}_{60}\text{H}_{68}\text{B}_2\text{F}_8\text{N}_8$ |
| Formula weight                          | 1954.73                                                                                                  | 1289.76                                                    | 1074.84                                                    |
| Temperature/K                           | 100(2)                                                                                                   | 100(2)                                                     | 100(2)                                                     |
| Crystal system                          | monoclinic                                                                                               | orthorhombic                                               | cubic                                                      |
| Space group                             | $\text{P}2_1/\text{n}$                                                                                   | Pbca                                                       | $\bar{1}4\ 3\text{d}$                                      |
| $a/\text{\AA}$                          | 14.3842(4)                                                                                               | 21.2713(8)                                                 | 26.404(3)                                                  |
| $b/\text{\AA}$                          | 30.2287(10)                                                                                              | 23.8513(8)                                                 | 26.404(3)                                                  |
| $c/\text{\AA}$                          | 25.0716(8)                                                                                               | 27.7727(9)                                                 | 26.404(3)                                                  |
| $\alpha^\circ$                          | 90                                                                                                       | 90                                                         | 90                                                         |
| $\beta^\circ$                           | 104.894(2)                                                                                               | 90                                                         | 90                                                         |
| $\gamma^\circ$                          | 90                                                                                                       | 90                                                         | 90                                                         |
| Volume/ $\text{\AA}^3$                  | 10535.3(6)                                                                                               | 14090.4(8)                                                 | 18409(6)                                                   |
| Z                                       | 4                                                                                                        | 8                                                          | 12                                                         |
| $D_{\text{calc}}\ \text{g}/\text{cm}^3$ | 1.232                                                                                                    | 1.216                                                      | 1.163                                                      |
| $\mu/\text{mm}^{-1}$                    | 1.761                                                                                                    | 0.218                                                      | 0.086                                                      |
| $F(000)$                                | 4113.0                                                                                                   | 5536.0                                                     | 6792.0                                                     |
| Crystal size/ $\text{mm}^3$             | $0.4 \times 0.25 \times 0.09$                                                                            | $0.27 \times 0.2 \times 0.17$                              | $0.36 \times 0.34 \times 0.17$                             |
| Radiation                               | CuK $\alpha$                                                                                             | MoK $\alpha$                                               | MoK $\alpha$                                               |
| Wavelength/ $\text{\AA}$                | 1.54178                                                                                                  | 0.71073                                                    | 0.71073                                                    |
| $2\theta^\circ$                         | 6.466 to 139.982                                                                                         | 4.824 to 55.244                                            | 3.778 to 50.808                                            |
| Reflections collected                   | 97515                                                                                                    | 209918                                                     | 209989                                                     |
| Independent reflections                 | 19804                                                                                                    | 16280                                                      | 2828                                                       |
| $R_{\text{int}}$                        | 0.0813                                                                                                   | 0.1187                                                     | 0.0559                                                     |
| $R_{\text{sigma}}$                      | 0.0992                                                                                                   | 0.0477                                                     | 0.0122                                                     |
| Restraints                              | 1142                                                                                                     | 595                                                        | 678                                                        |
| Parameters                              | 1631                                                                                                     | 987                                                        | 249                                                        |
| GooF                                    | 1.036                                                                                                    | 1.033                                                      | 1.095                                                      |
| $R_1 [I > 2\sigma(I)]$                  | 0.0924                                                                                                   | 0.0796                                                     | 0.0822                                                     |
| $wR_2 [I > 2\sigma(I)]$                 | 0.2748                                                                                                   | 0.1976                                                     | 0.2286                                                     |
| $R_1 [\text{all data}]$                 | 0.1253                                                                                                   | 0.1340                                                     | 0.0876                                                     |
| $wR_2 [\text{all data}]$                | 0.3087                                                                                                   | 0.2452                                                     | 0.2377                                                     |
| Largest peak/ $e\ \text{\AA}^{-3}$      | 1.32                                                                                                     | 1.02                                                       | 0.35                                                       |
| Deepest hole/ $e\ \text{\AA}^{-3}$      | -0.77                                                                                                    | -0.82                                                      | -0.41                                                      |

## SUPPORTING INFORMATION

**Table S3.** Details of XRD data refinement of  $\alpha_3, \beta-1$ ,  $\alpha_3, \beta-P1 \cdot [C_6H_5SO_3^-]_6[H_2O]_2$  and  $\alpha_3, \beta-P1 \cdot [HSO_4^-]_6[H_2SO_4][CH_3OH][H_2O]_4$ .

| <b>Compound</b>                      | $\alpha_3, \beta-1$                            | $\alpha_3, \beta-P1 \cdot [C_6H_5SO_3^-]_6[H_2O]_2$                            | $\alpha_3, \beta-P1 \cdot [HSO_4^-]_6[H_2SO_4][CH_3OH][H_2O]_4$               |
|--------------------------------------|------------------------------------------------|--------------------------------------------------------------------------------|-------------------------------------------------------------------------------|
| CCDC #                               | 2012198                                        | 2012197                                                                        | 2012195                                                                       |
| Empirical formula                    | C <sub>60</sub> H <sub>66</sub> N <sub>8</sub> | C <sub>96</sub> H <sub>106</sub> N <sub>8</sub> O <sub>20</sub> S <sub>6</sub> | C <sub>61</sub> H <sub>92</sub> N <sub>8</sub> O <sub>33</sub> S <sub>7</sub> |
| Formula weight                       | 899.20                                         | 1884.24                                                                        | 1689.84                                                                       |
| Temperature/K                        | 100(2)                                         | 100(2)                                                                         | 100(2)                                                                        |
| Crystal system                       | triclinic                                      | triclinic                                                                      | triclinic                                                                     |
| Space group                          | P $\bar{1}$                                    | P $\bar{1}$                                                                    | P $\bar{1}$                                                                   |
| a/Å                                  | 13.4646(9)                                     | 13.890(3)                                                                      | 13.2007(5)                                                                    |
| b/Å                                  | 13.7785(9)                                     | 16.457(3)                                                                      | 14.5421(5)                                                                    |
| c/Å                                  | 16.0771(11)                                    | 21.147(3)                                                                      | 23.9326(9)                                                                    |
| $\alpha^\circ$                       | 105.194(2)                                     | 81.292(5)                                                                      | 105.4300(10)                                                                  |
| $\beta^\circ$                        | 96.975(2)                                      | 82.916(4)                                                                      | 90.996(2)                                                                     |
| $\gamma^\circ$                       | 107.247(2)                                     | 80.393(6)                                                                      | 115.7820(10)                                                                  |
| Volume/Å <sup>3</sup>                | 2684.0(3)                                      | 4687.5(14)                                                                     | 3940.6(3)                                                                     |
| Z                                    | 2                                              | 2                                                                              | 2                                                                             |
| D <sub>calc</sub> g/cm <sup>3</sup>  | 1.113                                          | 1.335                                                                          | 1.424                                                                         |
| $\mu$ /mm <sup>-1</sup>              | 0.066                                          | 1.962                                                                          | 0.290                                                                         |
| F(000)                               | 964.0                                          | 1988.0                                                                         | 1780.0                                                                        |
| Crystal size/mm <sup>3</sup>         | 0.34 × 0.09 × 0.06                             | 0.25 × 0.2 × 0.1                                                               | 0.455 × 0.142 × 0.056                                                         |
| Radiation                            | MoK $\alpha$                                   | CuK $\alpha$                                                                   | MoK $\alpha$                                                                  |
| Wavelength/Å                         | 0.71073                                        | 1.54178                                                                        | 0.71073                                                                       |
| 2 $\theta^\circ$                     | 5.134 to 51.088                                | 4.248 to 139.05                                                                | 5.332 to 50.5                                                                 |
| Reflections collected                | 50635                                          | 43476                                                                          | 36013                                                                         |
| Independent reflections              | 9967                                           | 17189                                                                          | 14224                                                                         |
| R <sub>int</sub>                     | 0.1530                                         | 0.0339                                                                         | 0.0522                                                                        |
| R <sub>sigma</sub>                   | 0.1063                                         | 0.0474                                                                         | 0.0760                                                                        |
| Restraints                           | 1034                                           | 2216                                                                           | 2373                                                                          |
| Parameters                           | 925                                            | 1819                                                                           | 1653                                                                          |
| GooF                                 | 1.005                                          | 1.234                                                                          | 1.023                                                                         |
| R <sub>1</sub> [I > 2 $\sigma$ (I)]  | 0.0783                                         | 0.0971                                                                         | 0.0942                                                                        |
| wR <sub>2</sub> [I > 2 $\sigma$ (I)] | 0.1868                                         | 0.2940                                                                         | 0.2657                                                                        |
| R <sub>1</sub> [all data]            | 0.1759                                         | 0.1196                                                                         | 0.1457                                                                        |
| wR <sub>2</sub> [all data]           | 0.2422                                         | 0.3205                                                                         | 0.3088                                                                        |
| Largest peak/e Å <sup>-3</sup>       | 0.38                                           | 0.88                                                                           | 1.10                                                                          |
| Deepest hole/e Å <sup>-3</sup>       | -0.25                                          | -0.78                                                                          | -0.90                                                                         |

## SUPPORTING INFORMATION

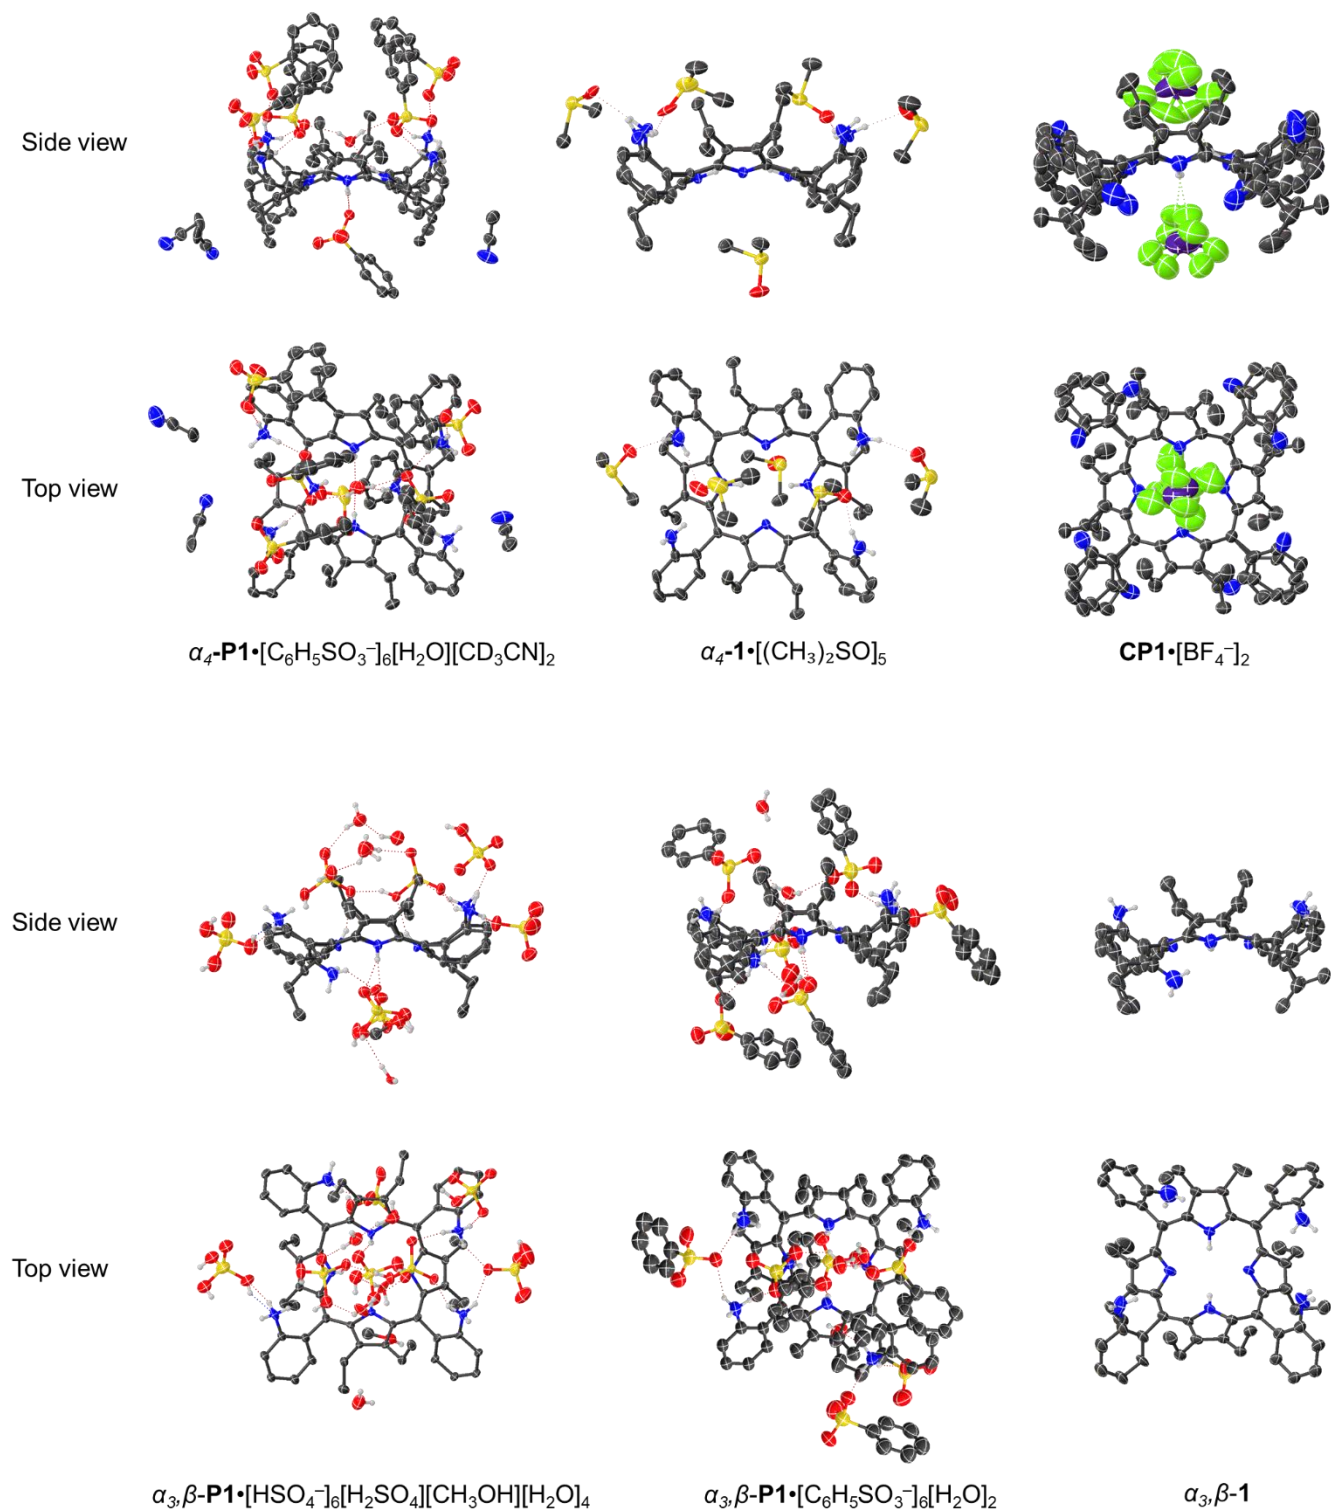

**Figure S40.** Side and top views of the single porphyrin units in the single crystal X-ray structures obtained. Non-essential hydrogen atoms were omitted for clarity and thermal ellipsoids give 50% probability.

## SUPPORTING INFORMATION

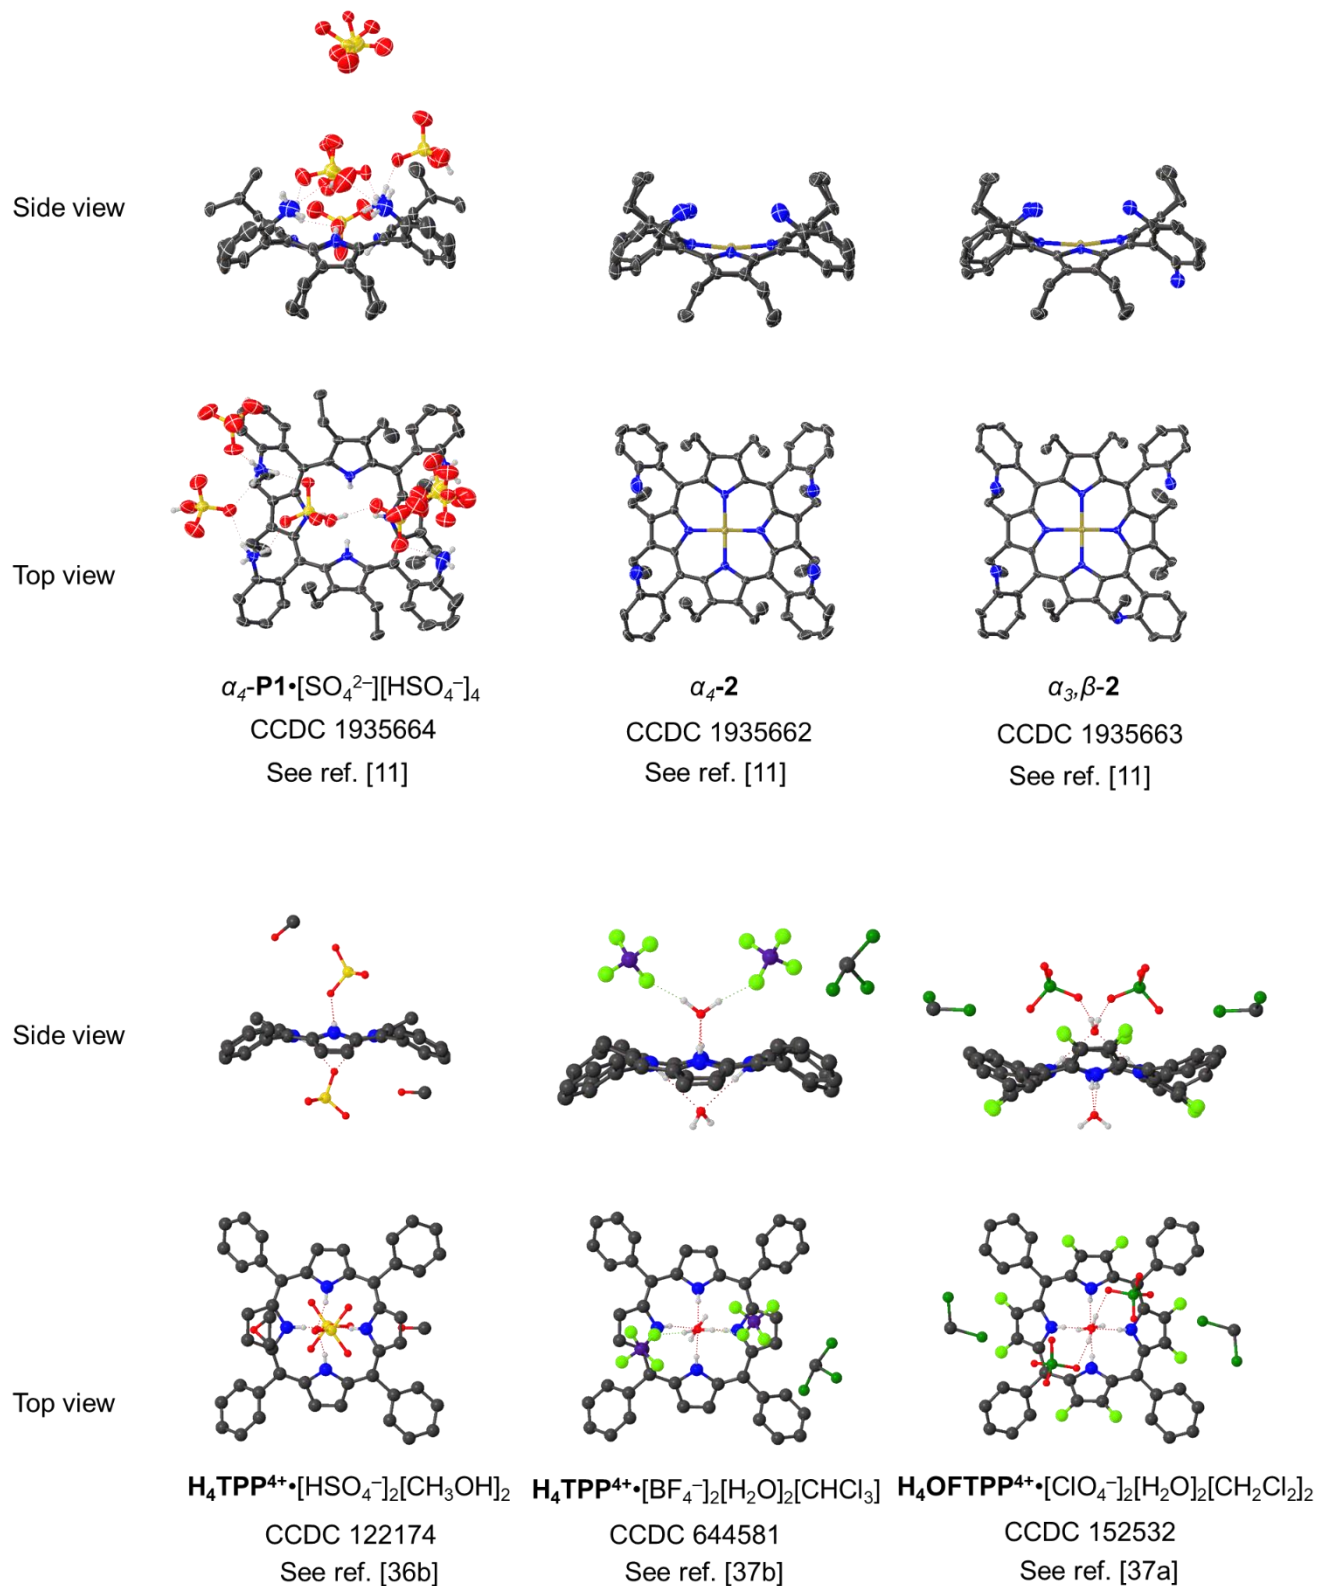

**Figure S41.** Side and top views of the single porphyrin units discussed. Non-essential hydrogen atoms were omitted for clarity and thermal ellipsoids give 50% probability.



## SUPPORTING INFORMATION

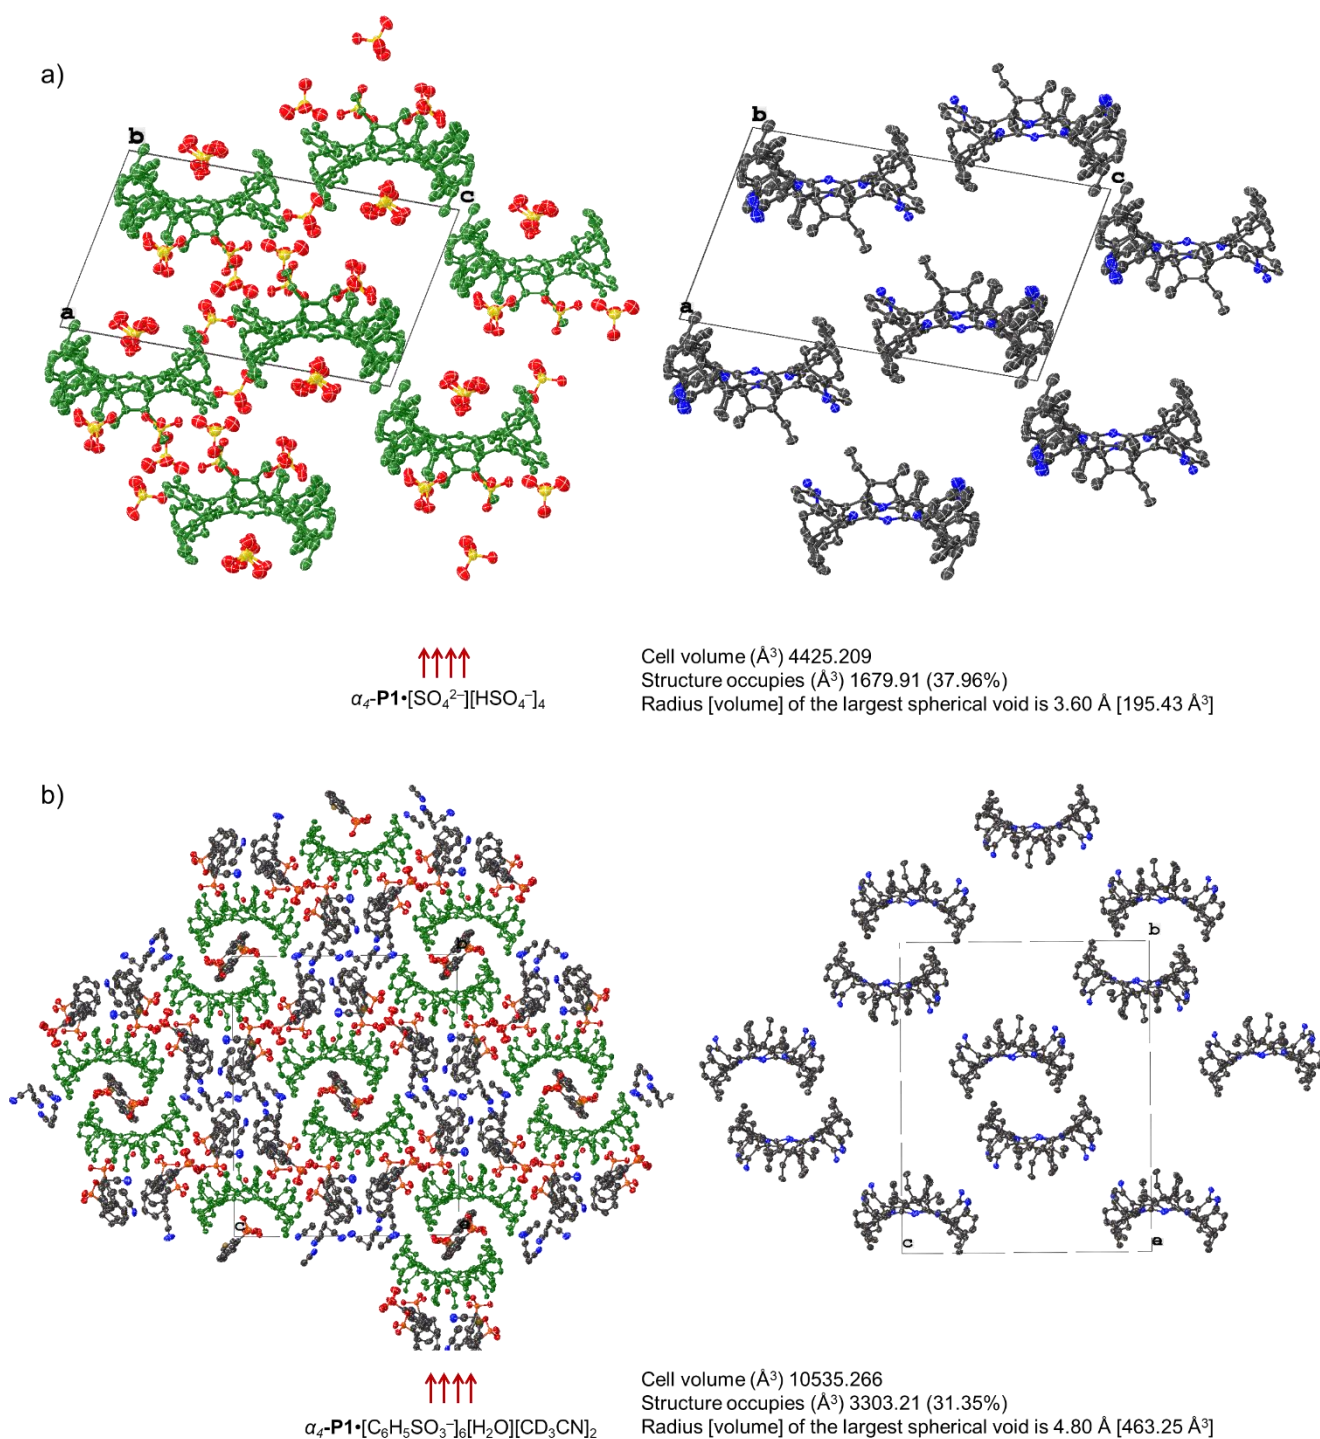

**Figure S42.** Crystal packing illustrations of a)  $\alpha_4\text{-P1}\cdot[\text{SO}_4^{2-}][\text{HSO}_4^-]_4$  and b)  $\alpha_4\text{-P1}\cdot[\text{C}_6\text{H}_5\text{SO}_3^-]_6[\text{H}_2\text{O}][\text{CD}_3\text{CN}]_2$ . On the left, single units are highlighted in green; on the right, representation of single units without counter anions and solvents (non-essential hydrogen atoms omitted for clarity and thermal ellipsoids give 50% probability).

## SUPPORTING INFORMATION

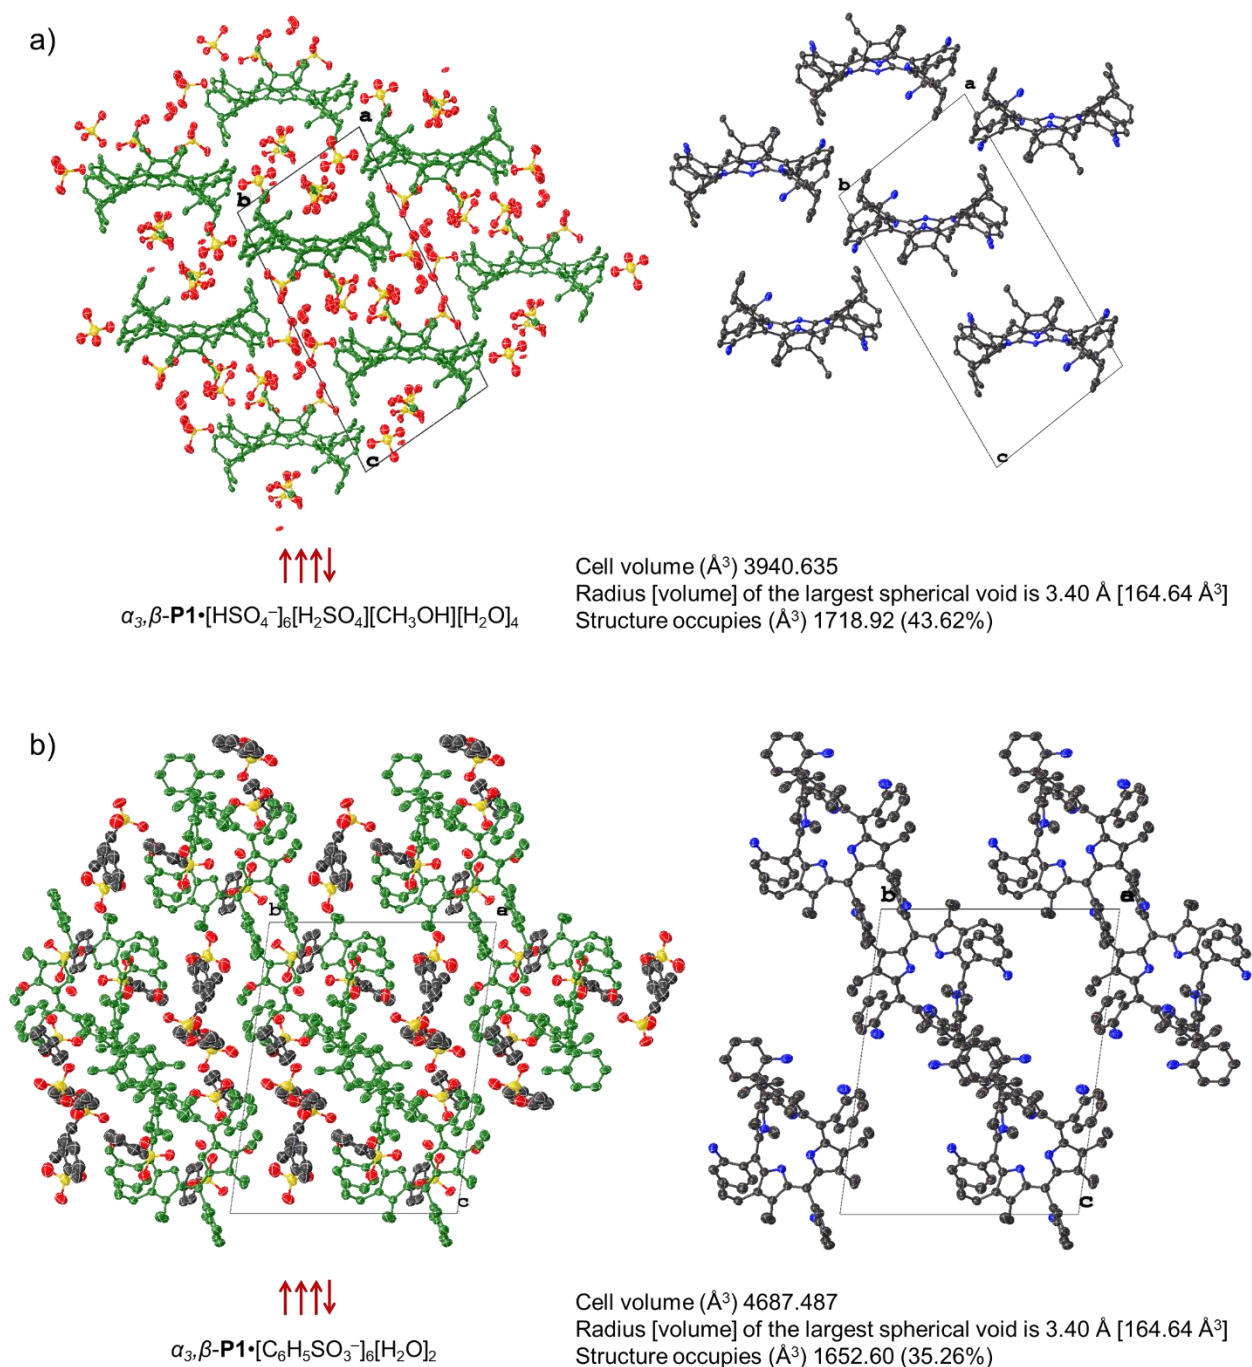

**Figure S43.** Crystal packing illustrations of a)  $\alpha_3, \beta\text{-P1} \cdot [\text{HSO}_4^-]_6 [\text{H}_2\text{SO}_4] [\text{CH}_3\text{OH}] [\text{H}_2\text{O}]_4$  and b)  $\alpha_3, \beta\text{-P1} \cdot [\text{C}_6\text{H}_5\text{SO}_3^-]_6 [\text{H}_2\text{O}]_2$ . On the left, single units are highlighted in green; on the right, representation of single units without counter anions and solvents (non-essential hydrogen atoms omitted for clarity and thermal ellipsoids give 50% probability).

## SUPPORTING INFORMATION

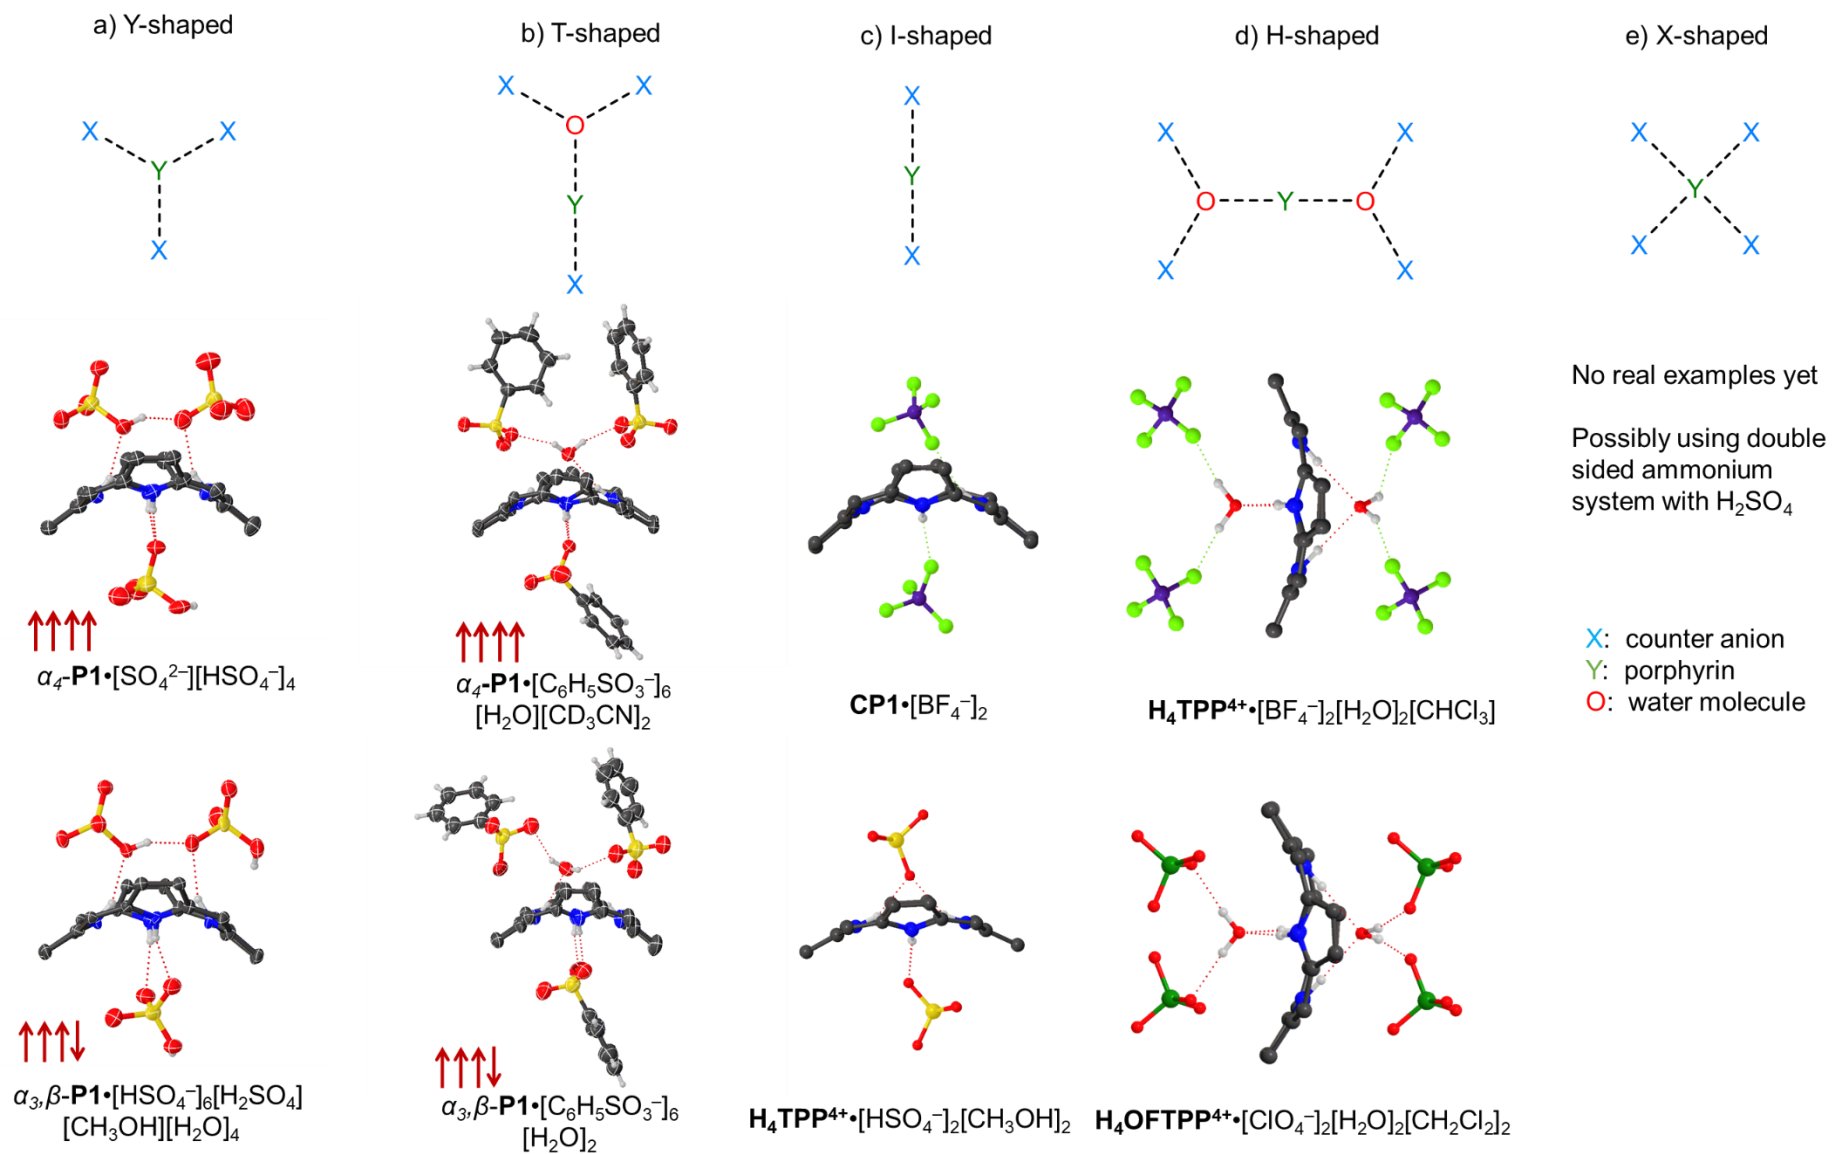

**Figure S44.** Core interactions observed in various protonated porphyrins showing different type complexes: a) T-shaped; b) Y-shaped ; c) I-shaped ; d) H-shaped; e) X-shaped. See figure S40 and S41 for more structural detail. (meso- and  $\beta$ -substituents and non-essential hydrogen atoms omitted for clarity and thermal ellipsoids give 50% probability).

## SUPPORTING INFORMATION

**Table S4.** Summary of protonated porphyrins deposited in the Cambridge Crystallographic Data Centre (CCDC).

| No. | Database Identifier | Deposition Number | Counter anion                                                                | Binding mode | No. | Database Identifier | Deposition Number | Counter anion                                                                | Binding mode |
|-----|---------------------|-------------------|------------------------------------------------------------------------------|--------------|-----|---------------------|-------------------|------------------------------------------------------------------------------|--------------|
| 1   | ANIHIQ              | 1477658           | ClO <sub>4</sub> <sup>-</sup>                                                | I            | 39  | QARCAQ              | 1506817           | CF <sub>3</sub> COO <sup>-</sup>                                             | I            |
| 2   | ASUNAD              | 238703            | Cl <sup>-</sup>                                                              | I            | 40  | QEZKIP              | 159608            | CF <sub>3</sub> COO <sup>-</sup>                                             | I            |
| 3   | BASJUA              | 118284            | CF <sub>3</sub> COO <sup>-</sup>                                             | I            | 41  | QOSYUT              | 718407            | Cl <sup>-</sup>                                                              | I            |
| 4   | BEJDIG              | 1496256           | BiCl <sub>6</sub> <sup>3-</sup>                                              | I            | 42  | QURRAY              | 1058018           | C <sub>6</sub> H <sub>2</sub> (NO <sub>2</sub> ) <sub>3</sub> O <sup>-</sup> | I            |
| 5   | CETPEX              | 614470            | CF <sub>3</sub> COO <sup>-</sup>                                             | I            | 43  | RALVAC              | 257492            | CF <sub>3</sub> COO <sup>-</sup>                                             | I            |
| 6   | COFYAY              | 688606            | C <sub>5</sub> H <sub>4</sub> NCOO <sup>-</sup>                              | I            | 44  | RARQEJ              | 1544022           | Cl <sup>-</sup>                                                              | I*           |
| 7   | FARBEI              | 1431307           | C <sub>6</sub> H <sub>2</sub> (NO <sub>2</sub> ) <sub>3</sub> O <sup>-</sup> | I            | 45  | RATXUI              | 1498506           | CF <sub>3</sub> COO <sup>-</sup>                                             | I            |
| 8   | FATQUP              | 956522            | CF <sub>3</sub> COO <sup>-</sup>                                             | I            | 46  | REVROZ              | 1248861           | ClO <sub>4</sub> <sup>-</sup>                                                | I            |
| 9   | FIMRAV              | 247692            | Cl <sup>-</sup>                                                              | I            | 47  | RUHQAM              | 1252430           | ClO <sub>4</sub> <sup>-</sup>                                                | I            |
| 10  | FOKZUC              | 700701            | Cl <sup>-</sup>                                                              | I            | 48  | RUHQEQ              | 1252431           | ClO <sub>4</sub> <sup>-</sup>                                                | I            |
| 11  | GOBSOF              | 113958            | CF <sub>3</sub> COO <sup>-</sup>                                             | I            | 49  | RUHQIU              | 1252432           | ClO <sub>4</sub> <sup>-</sup>                                                | I            |
| 12  | GOBYIF              | 113963            | CF <sub>3</sub> COO <sup>-</sup>                                             | I            | 50  | SEPVIT              | 272182            | CF <sub>3</sub> COO <sup>-</sup>                                             | I            |
| 13  | GUZMUJ              | 209626            | C <sub>6</sub> H <sub>2</sub> (NO <sub>2</sub> ) <sub>3</sub> O <sup>-</sup> | I            | 51  | TIQLAH              | 626214            | Cl <sup>-</sup>                                                              | I            |
| 14  | KEVDAT              | 1549180           | Cl <sup>-</sup>                                                              | I            | 52  | TIQLEL              | 626215            | Cl <sup>-</sup>                                                              | I            |
| 15  | KIBLIQ              | 140336            | CF <sub>3</sub> COO <sup>-</sup>                                             | I            | 53  | TIQLIP              | 626216            | Cl <sup>-</sup>                                                              | I            |
| 16  | KIBMAJ              | 140337            | CF <sub>3</sub> COO <sup>-</sup>                                             | I            | 54  | TPPFEC              | 1275452           | Cl <sup>-</sup>                                                              | I            |
| 17  | KIBMEN              | 140338            | CF <sub>3</sub> COO <sup>-</sup>                                             | I            | 55  | TPYPRC10            | 1275614           | Cl <sup>-</sup>                                                              | I            |
| 18  | KIBPEQ              | 140340            | CF <sub>3</sub> COO <sup>-</sup>                                             | I            | 56  | VACSIC              | 188053            | Cl <sup>-</sup>                                                              | I            |
| 19  | KIBPEQ01            | 140339            | CF <sub>3</sub> COO <sup>-</sup>                                             | I            | 57  | VOGZAT              | 670105            | Cl <sup>-</sup>                                                              | I            |
| 20  | LEXSIQ              | 122174            | HSO <sub>4</sub> <sup>-</sup>                                                | I            | 58  | WINXEW              | 1294090           | CH <sub>3</sub> COO <sup>-</sup>                                             | I            |
| 21  | LEYFOK              | 122173            | CH <sub>3</sub> SO <sub>4</sub> <sup>-</sup>                                 | I            | 59  | WIXDIT              | 1868761           | CF <sub>3</sub> SO <sub>3</sub> <sup>-</sup>                                 | I            |
| 22  | LEYFUQ              | 122172            | CF <sub>3</sub> COO <sup>-</sup>                                             | I            | 60  | WIXZAF              | 644581            | BF <sub>4</sub> <sup>-</sup>                                                 | H            |
| 23  | LEYHIG              | 122171            | CF <sub>3</sub> COO <sup>-</sup>                                             | I            | 61  | WUKBOT              | 152532            | ClO <sub>4</sub> <sup>-</sup>                                                | H            |
| 24  | LEYPEK              | 122177            | Cl <sup>-</sup>                                                              | I            | 62  | XAQKOR              | 866745            | Cl <sup>-</sup>                                                              | I            |
| 25  | LEYQAH              | 122178            | CF <sub>3</sub> COO <sup>-</sup>                                             | I            | 63  | XARVIW              | 280014            | CF <sub>3</sub> COO <sup>-</sup>                                             | I            |
| 26  | LOGMOJ              | 116299            | CH <sub>3</sub> SO <sub>3</sub> <sup>-</sup>                                 | I            | 64  | XEDFOD              | 866776            | ClO <sub>4</sub> <sup>-</sup>                                                | I            |
| 27  | LOLPOR              | 147305            | C <sub>8</sub> H <sub>7</sub> O <sub>3</sub>                                 | I            | 65  | XEDFUJ              | 866777            | ClO <sub>4</sub> <sup>-</sup>                                                | I            |
| 28  | MANHOZ              | 221910            | CF <sub>3</sub> COO <sup>-</sup>                                             | I            | 66  | XEDGAQ              | 866778            | Cl <sup>-</sup>                                                              | I            |
| 29  | MANHUF              | 237514            | CF <sub>3</sub> COO <sup>-</sup>                                             | I            | 67  | XEDGEU              | 866779            | Cl <sup>-</sup>                                                              | I            |
| 30  | MANJAN              | 238568            | CF <sub>3</sub> COO <sup>-</sup>                                             | I            | 68  | XEKDEZ              | 1563442           | CF <sub>3</sub> COO <sup>-</sup>                                             | I            |
| 31  | MIGNEW              | 654893            | Cl <sup>-</sup>                                                              | I            | 69  | XOSYAI              | 1935664           | HSO <sub>4</sub> <sup>-</sup>                                                | Y            |
| 32  | NICPEV              | 644176            | CHB <sub>11</sub> Cl <sub>11</sub> <sup>-</sup>                              | I            | 70  | YEVJAN              | 1301876           | ClO <sub>4</sub> <sup>-</sup>                                                | I            |
| 33  | NUFTEO              | 727607            | C <sub>10</sub> H <sub>7</sub> COO <sup>-</sup>                              | I            | 71  | YEVKAL              | 122175            | CF <sub>3</sub> COO <sup>-</sup>                                             | I**          |
| 34  | NUHKUW              | 1223952           | Cl <sup>-</sup>                                                              | I            | 72  | YEVKIT              | 1301879           | CF <sub>3</sub> COO <sup>-</sup>                                             | I            |
| 35  | OCAQAN              | 1012816           | HSO <sub>4</sub> <sup>-</sup>                                                | I            | 73  | YEVKIT01            | 122176            | CF <sub>3</sub> COO <sup>-</sup>                                             | I            |
| 36  | OCIQEY              | 825053            | OH <sup>-</sup>                                                              | I            | 74  | YEVKOZ              | 1301880           | CF <sub>3</sub> COO <sup>-</sup>                                             | I*           |
| 37  | PACXEY              | 793068            | C <sub>10</sub> H <sub>9</sub> FeCOO <sup>-</sup>                            | I            | 75  | YEVKUF              | 1301881           | CF <sub>3</sub> COO <sup>-</sup>                                             | I            |
| 38  | PEZXAW              | 1576905           | Cl <sup>-</sup>                                                              | I            |     |                     |                   |                                                                              |              |

\*Binary heterogeneous binding mode. In RARQEJ the secondary counter anion is 4-(1-benzylpyridin-1-ium-4-yl)benzoate; In EVKOZ the secondary counter anion is acetate.

\*\*'cis'-protonated porphyrin

## SUPPORTING INFORMATION

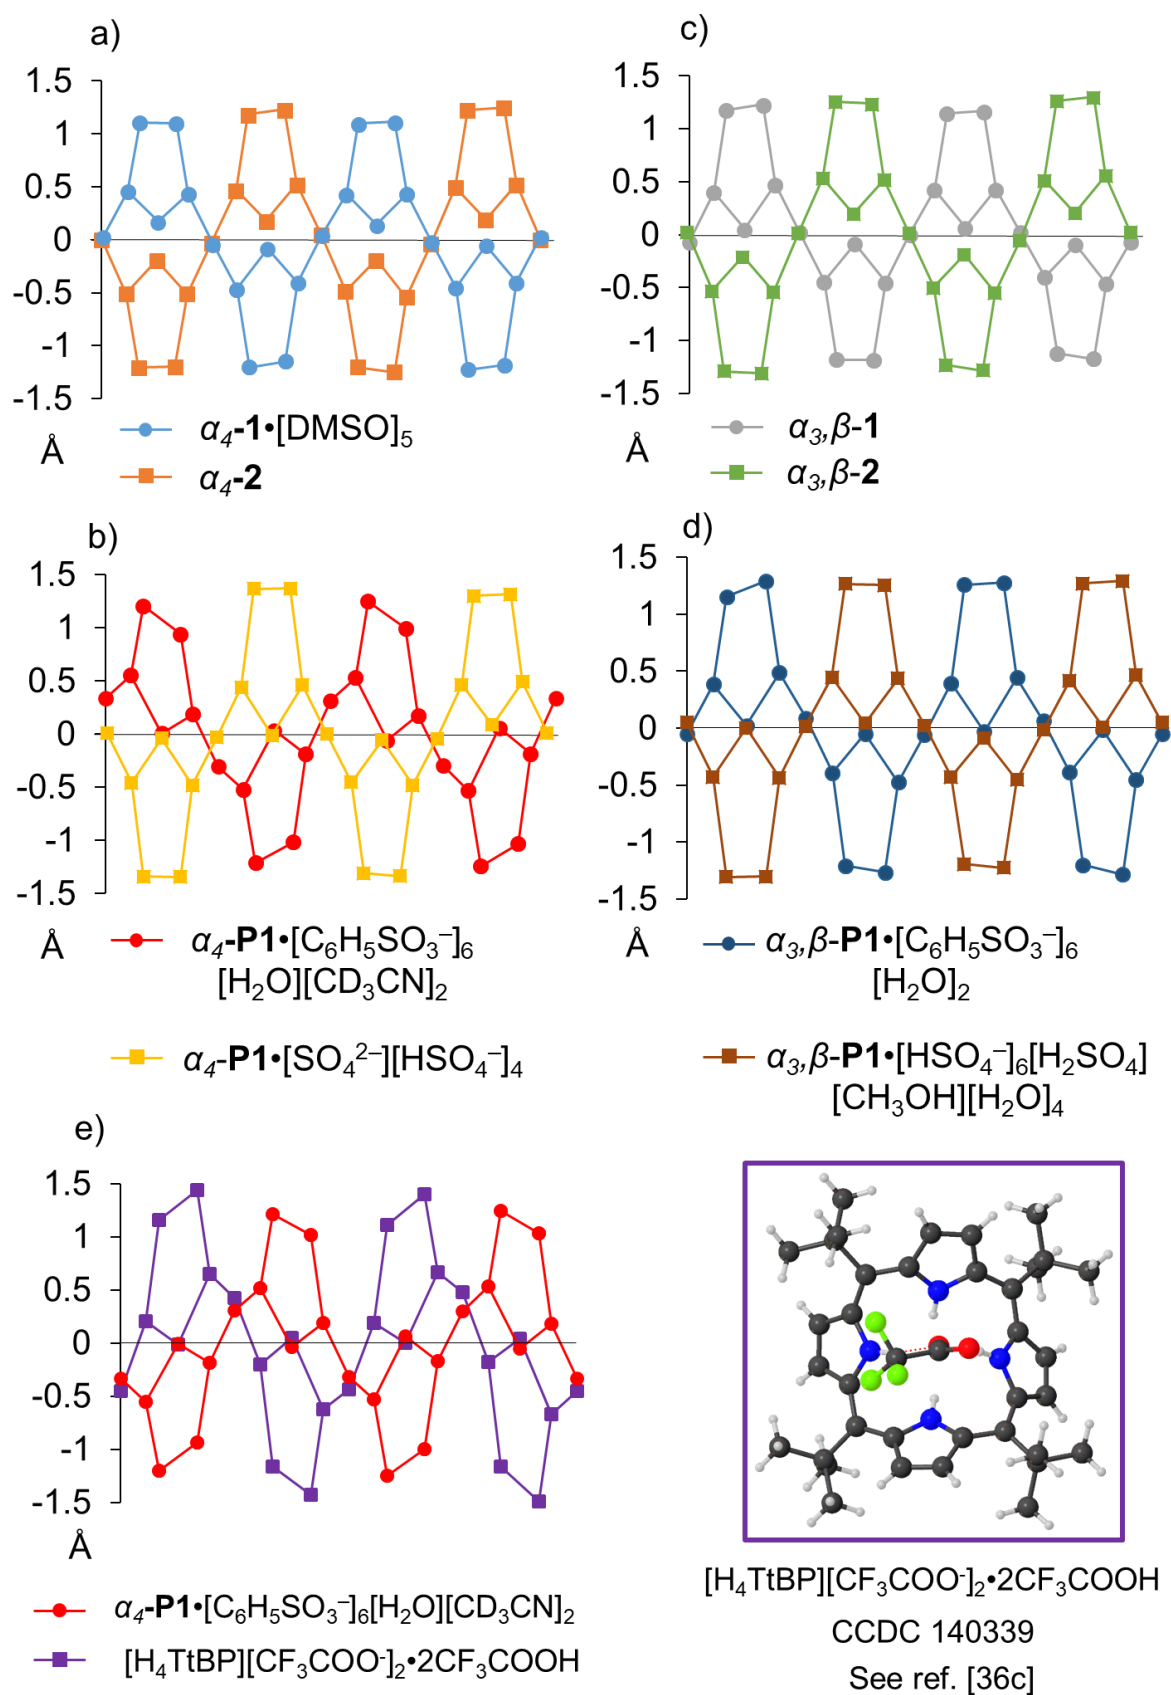

**Figure S45.** Linear display of the skeletal deviations: a) free base  $\uparrow\uparrow\uparrow\uparrow$  1 (light blue) and Ni(II)  $\uparrow\uparrow\uparrow\uparrow$  2 (orange); b)  $\uparrow\uparrow\uparrow\uparrow$  P1 with H<sub>2</sub>SO<sub>4</sub> (yellow) and BSA (red); c) free base  $\uparrow\uparrow\uparrow\downarrow$  1 (grey) and Ni(II)  $\uparrow\uparrow\uparrow\downarrow$  2 (green); d)  $\uparrow\uparrow\uparrow\downarrow$  P1 with H<sub>2</sub>SO<sub>4</sub> (brown) and BSA (dark blue); e)  $\uparrow\uparrow\uparrow\uparrow$  P1 with BSA (red) and H<sub>4</sub>TtBP with TFA.<sup>[36c]</sup>

## SUPPORTING INFORMATION

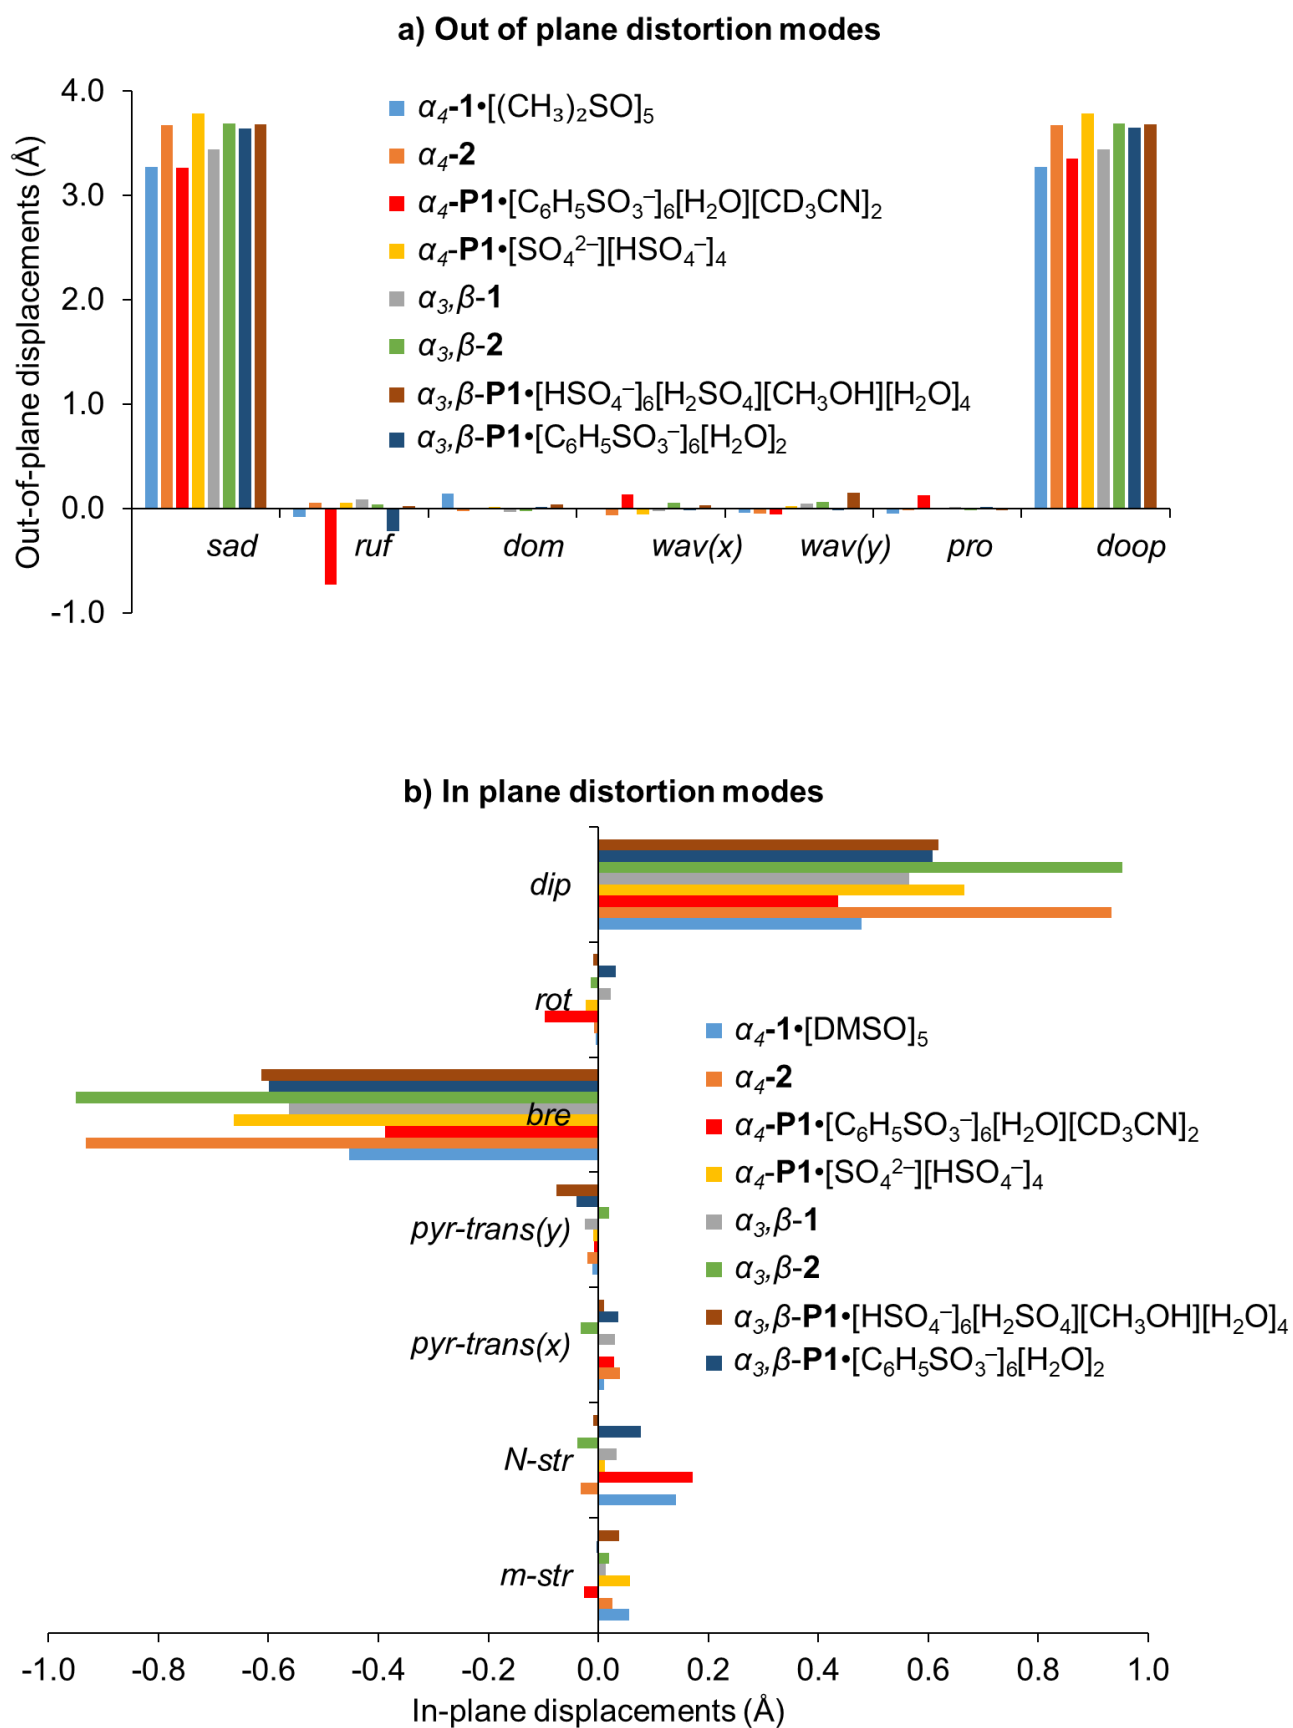

**Figure S46.** Illustration of the a) out-of-plane and b) in-plane normal-coordinate structural decomposition results for  $\uparrow\uparrow\uparrow$  and  $\uparrow\uparrow\downarrow$  atropisomers in free base **1**, Ni(II) **2** and protonated **P1** with  $\text{H}_2\text{SO}_4$  and **BSA** forms.

## SUPPORTING INFORMATION

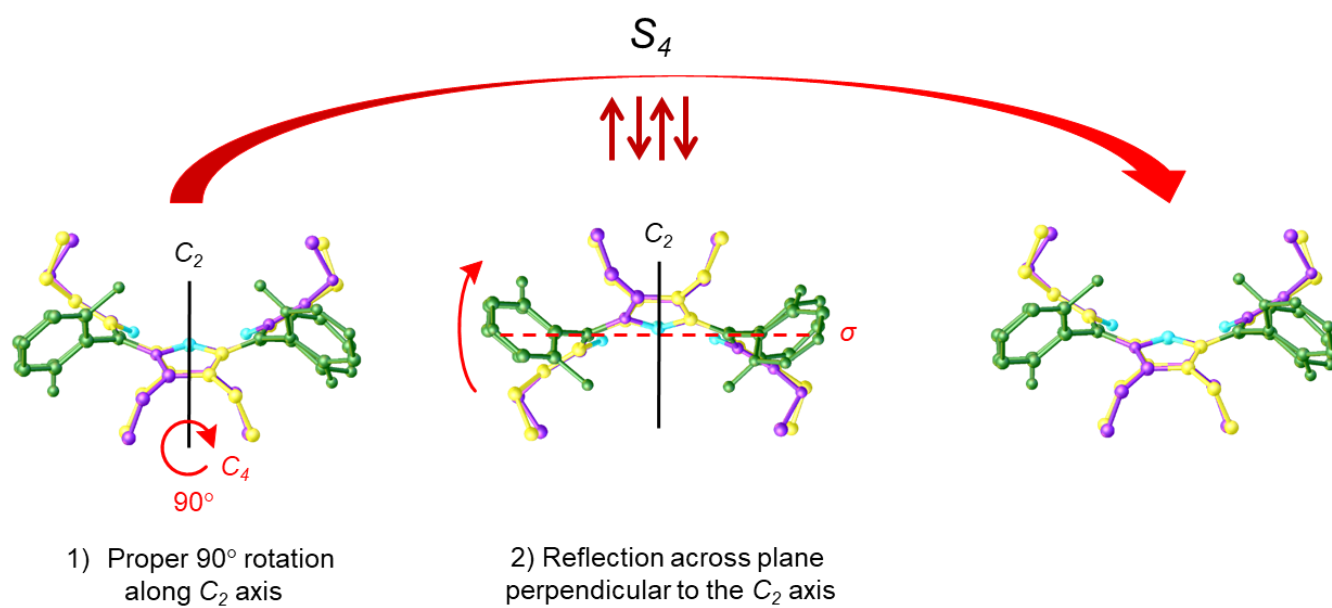

**Figure S47.** Improper rotation represented in the  $\alpha,\beta,\alpha,\beta$ -P1 atropisomer. The X-ray crystal structure of  $\alpha,\beta,\alpha,\beta$ -2 was used to visualize the symmetrical units observed from NMR analysis.

## SUPPORTING INFORMATION

## References

- [S1] APEX3, Version 2016.9-0, Bruker AXS, Inc., Madison, WI, **2016**.
- [S2] SADABS, Version 2016/2, Bruker AXS, Inc., Madison, WI, **2014**.
- [S3] W. Jentzen, X.-Z. Song, J. A. Shelnut, *J. Phys. Chem. B* **1997**, *101*, 1684–1699.
- [S4] L. Sun and J. A. Shelnut, NSDGUI (Version 1.3 Alpha version), Sandia National Laboratory, Albuquerque, USA., **2000–2001**.
- [S5] H. Hope, *Prog. Inorg. Chem.* **2007**, *41*, 1–19.
- [S6] a) O. V. Dolomanov, L. J. Bourhis, R. J. Gildea, J. A. K. Howard, H. Puschmann, *J. Appl. Cryst.* **2009**, *42*, 339–341;  
b) G. Sheldrick, *Acta Crystallogr.* **2015**, *A71*, 3–8.
